# Supplementary material for: LncRNA PCNAP1 modulates hepatitis B virus replication and enhances tumor growth of liver cancer
Source: PubMed Central journal article supplement (PMC6691589; doi:10.7150/thno.34273), 2019-07-09
Supplement: thnov09p5227s1.pdf [file thnov09p5227s1.pdf]

## **Supplementary materials and methods**

### **Analysis of tumorigenicity in nude mice.**

All experimental procedures involving animals were in accordance with the Guide for the Care and Use of Laboratory Animals (NIH publications nos. 80-23, revised 1996) and were performed according to the institutional ethical guidelines for animal experiment [1-3]. HepG2.2.15 and HepG2 cells were transfected *in vitro* with 100 nM (final concentration) siCtrl or siPCNAP1 by using Lipofectamine RNAiMAX (Invitrogen, Carlsbad, CA). At 48 hours after transfection,  $10^7$  viable cells were injected subcutaneously into the right flanks of 4- to 6-week-old male BALB/c athymic nude mice, six mice per group. Tumor growth was measured after 10 days from injection and then every 5 days. At 30 days after injection, mice were sacrificed and tumors were weighed after necropsy. Tumor volume (V) was monitored by measuring the length (L) and width (W) with calipers and calculated with the formula [4] \* 0.5. The Institute Research Ethics Committee at the Nankai University approved the study protocol.

### **Analysis of cell proliferation.**

The protocol was described previously [1, 5-8]. Hepatoma cells were seeded into 96 well plates (2000 cells/well) for 12 hours before transfection and 3-(4,5-dimethylthiazol-2-yl)-2,5-diphenyltetrazolium bromide (MTT) assay was used to assess cell proliferation every day from the first day until the third day after transfection. 5-ethynyl-2'-deoxyuridine [9] incorporation assay was carried out using the Cell-Light™ EdU imaging detecting kit according to the manufacturer's instructions (RiboBio, Guangzhou, China). For colony formation analysis, 48 hours after transfection, 1000 viable transfected cells (HepG2.2.15,

HepG2 and HepG2-X cells) were placed in 6-well plates and maintained in complete medium for 2 weeks. Colonies were fixed with methanol and stained with methylene blue.

#### **Co-immunoprecipitation assays.**

The co-immunoprecipitation (co-IP) protocol was described in detail in previously published articles [10]. The lysates harvested from Hepatoma cells transfected with different regimens as the manufacturer's instructions were then subjected to overnight immunoprecipitation at 4°C using 2–5 µg of antibodies listed in Table S4. Negative controls with IgG were included in each experiment. Immune complexes were incubated with protein A/G agarose beads at 4°C. The precipitates were washed six times with ice-cold lysis buffer, resuspended in the PBS, and resolved by SDS-PAGE followed by Western blot analysis.

#### **Immunohistochemistry.**

The tumor tissue from nude mice were fixed and embedded with paraffin after those mice were sacrificed. Immunohistochemical staining of samples were performed as previously reported [1, 6-8] and the primary antibody of rabbit anti-Ki-67 was used (Table S4).

#### **TCGA database**

Public TCGA (<https://portal.gdc.cancer.gov/>) data repositories for liver hepatocellular carcinoma (LIHC) (Cancer Genome Atlas Network, 2014) were used to analyze the expression of PCNA and miR-154.

#### **References**

1. Gao Y, Feng J, Yang G, Zhang S, Liu Y, Bu Y, et al. HBx-elevated MSL2 modulates HBV cccDNA through inducing degradation of APOBEC3B to enhance hepatocarcinogenesis. *Hepatology*. 2017; 66: 1413-1429.

2. Wang Y, Chen F, Zhao M, Yang Z, Li J, Zhang S, et al. The long noncoding RNA HULC promotes liver cancer by increasing the expression of the HMGA2 oncogene via sequestration of the microRNA-186. *The Journal of biological chemistry*. 2017; 292: 15395-407.
3. Wang Y, Chen F, Yang Z, Zhao M, Zhang S, Gao Y, et al. The fragment HMGA2-sh-3p20 from HMGA2 mRNA 3'UTR promotes the growth of hepatoma cells by upregulating HMGA2. *Scientific reports*. 2017; 7: 2070.
4. Verrier ER, Yim SA, Heydmann L, El Saghire H, Bach C, Turon-Lagot V, et al. Hepatitis B virus evasion from cyclic guanosine monophosphate-adenosine monophosphate synthase sensing in human hepatocytes. *Hepatology*. 2018; 68: 1695-709.
5. Shan C, Xu F, Zhang S, You J, You X, Qiu L, et al. Hepatitis B virus X protein promotes liver cell proliferation via a positive cascade loop involving arachidonic acid metabolism and p-ERK1/2. *Cell research*. 2010; 20: 563-75.
6. Cui M, Xiao Z, Wang Y, Zheng M, Song T, Cai X, et al. Long noncoding RNA HULC modulates abnormal lipid metabolism in hepatoma cells through an miR-9-mediated RXRA signaling pathway. *Cancer Res*. 2015; 75: 846-57.
7. Zhang T, Zhang J, You X, Liu Q, Du Y, Gao Y, et al. Hepatitis B virus X protein modulates oncogene Yes-associated protein by CREB to promote growth of hepatoma cells. *Hepatology*. 2012; 56: 2051-9.
8. Feng GX, Li J, Yang Z, Zhang SQ, Liu YX, Zhang WY, et al. Hepatitis B virus X protein promotes the development of liver fibrosis and hepatoma through downregulation of miR-30e targeting P4HA2 mRNA. *Oncogene*. 2017; 36: 6895-905.

9. Yueduan W, Jinhua Z, Changling D, Yuhong Z, Lifang W, Bing S, et al. [Significance of the expression of proliferating cell nuclear antigen and P53 in the regeneration process of an atrophic parotid gland]. *Hua Xi Kou Qiang Yi Xue Za Zhi*. 2017; 35: 583-7.
10. Lee HW, Kyung T, Yoo J, Kim T, Chung C, Ryu JY, et al. Real-time single-molecule co-immunoprecipitation analyses reveal cancer-specific Ras signalling dynamics. *Nat Commun*. 2013; 4: 1505.

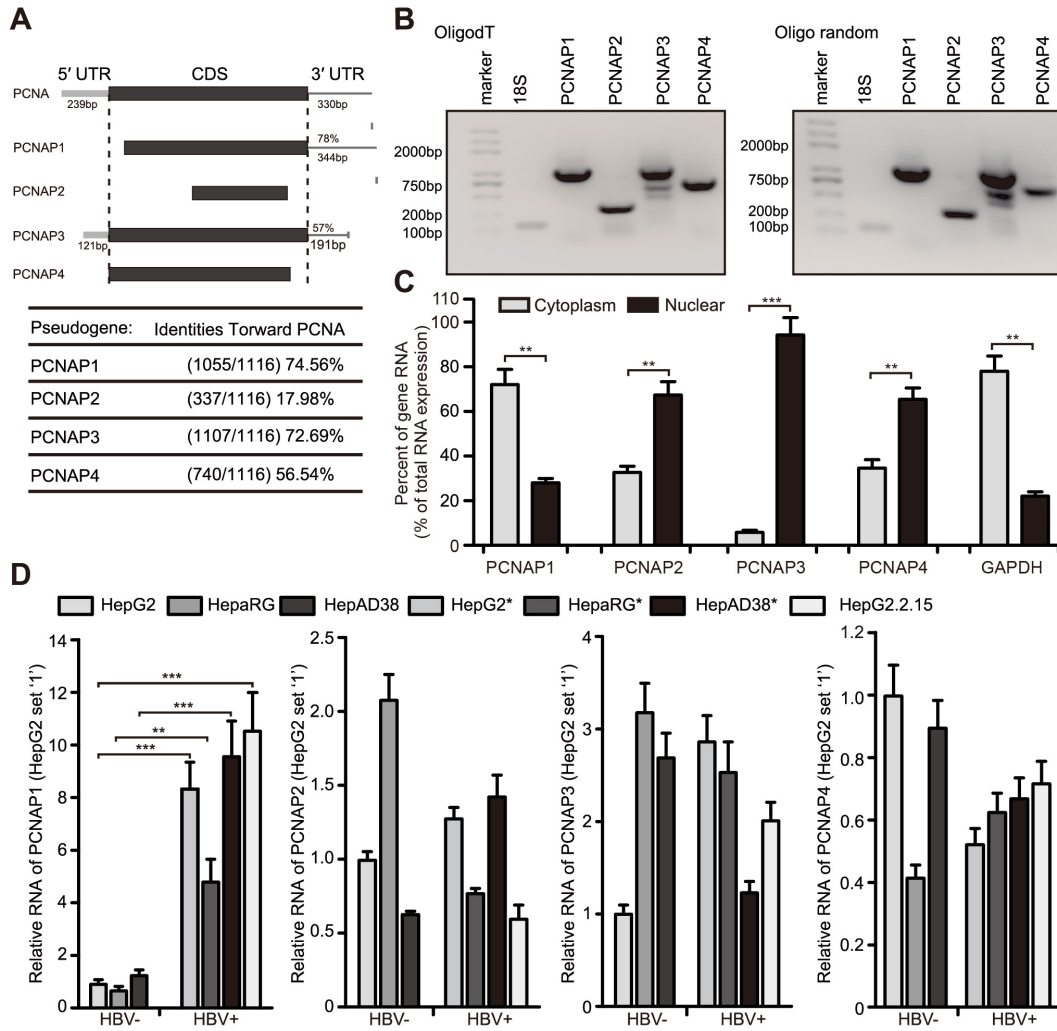

**Figure S1.** Characterization of human PCNA pseudogene PCNAP1. (A) Schematic representation of PCNA and PCNA pseudogenes transcripts. Regions with high homology to the PCNA mRNA 5'UTR or 3'UTR are indicated. (B) Verification of PCNA pseudogene expression in HepG2.2.15 by RT-PCR using oligo-dT primed (left panel) or random primed (right panel) cDNA. (C) Subcellular localization of PCNA pseudogene lncRNA in HepG2.2.15 cells, and the gene RNA of GAPDH were tested as a positive control. Expression values are shown as percentage of total RNA expression. (D) PCNA pseudogenes expression in HBV free or HBV positive hepatoma cells. Error bars represent means  $\pm$  SD (n=3). Statistical significant differences are indicated: \*\* $P$ <0.01; \*\*\* $P$ <0.001; NS, no significance;

Student's *t* test.

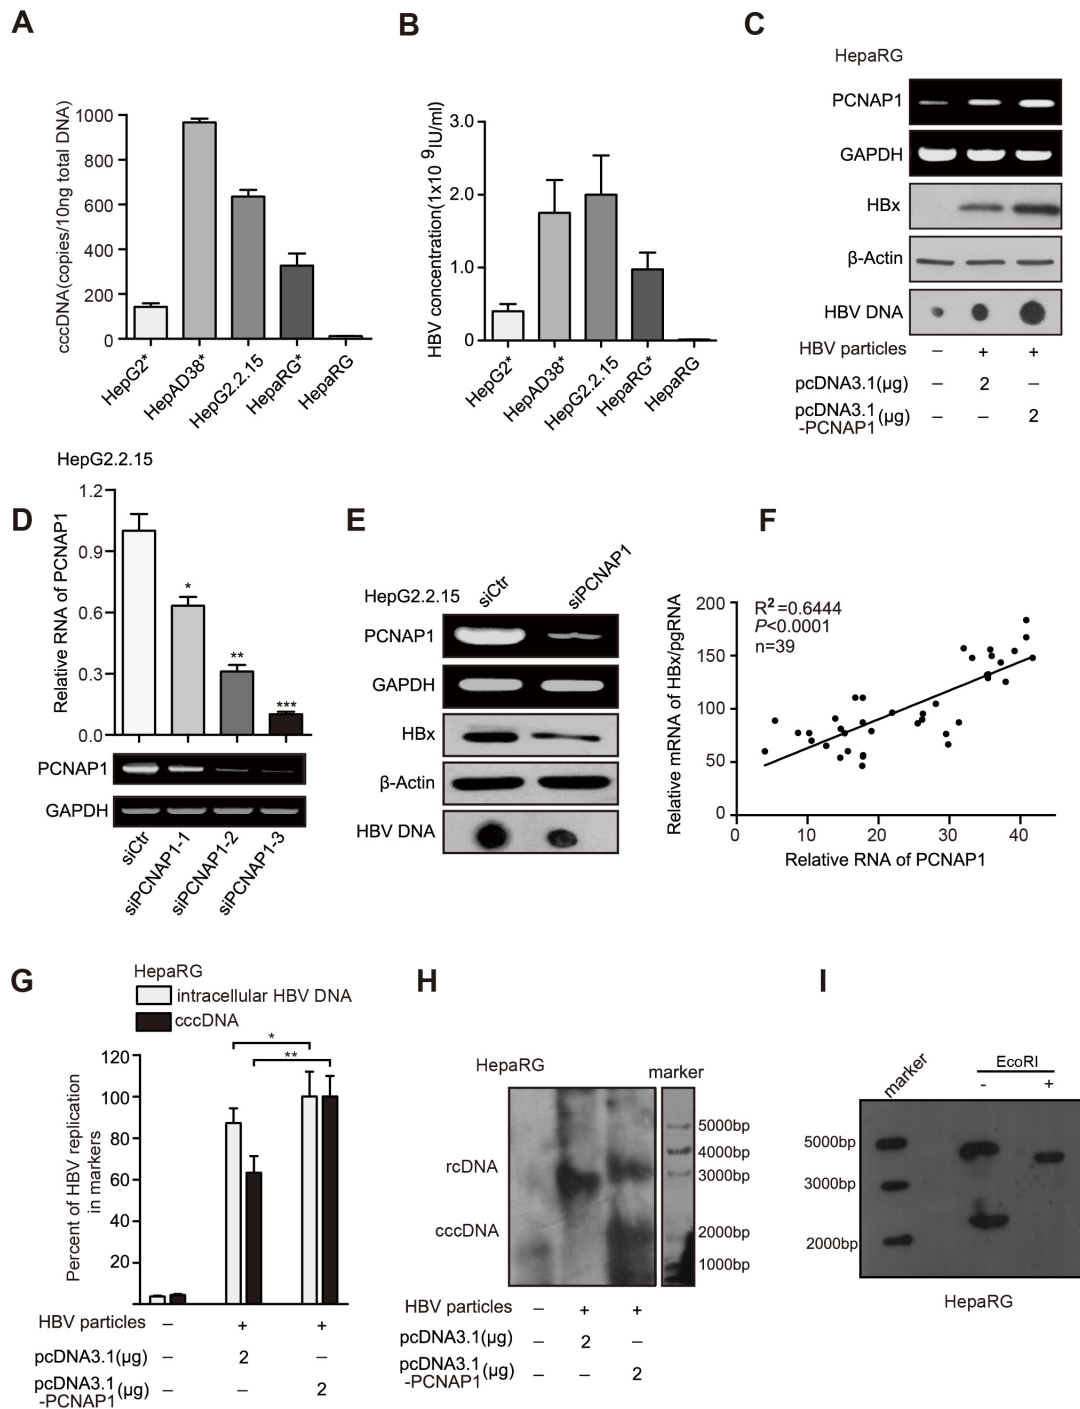

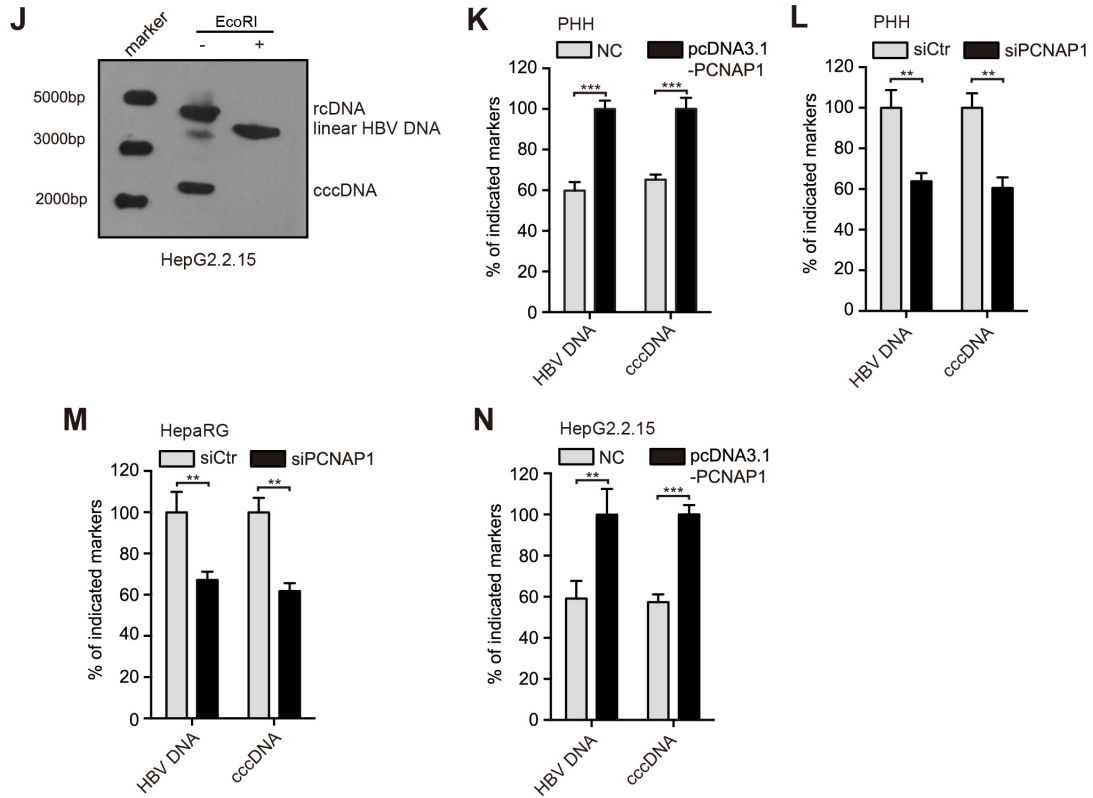

**Figure S2.** Pseudogene PCNAP1 promotes HBV replication and cccDNA accumulation. (A and B) The levels of HBV cccDNA and HBV progeny concentration were measured by qPCR in HBV-expressing cell lines including HepG2\*/HepG2.2.15/HepAD38\*/HepaRG\* as well as HepaRG cells without HBV infection as negative control. (C) The levels of PCNAP1, HBx and HBV progeny DNA were detected by RT-PCR, Western blot analysis and dot blot assays in HepaRG and HBV-infected HepaRG cells treated with pcDNA3.1 or pcDNA3.1-PCNAP1. (D) The silencing efficiency of siPCNAP1s was examined by RT-qPCR and RT-PCR in HepG2.2.15 cells. (E) In HepG2.2.15 cells treated with siCtr or siPCNAP1, the expression of PCNAP1, HBx and HBV progeny DNA were tested by RT-PCR, Western blot analysis and dot blot assays, respectively. (F) Correlation between the PCNAP1 RNA levels and the HBx levels was examined by RT-qPCR in 39 cases of HCC tissues ( $***P < 0.0001$ ,  $R^2 = 0.6444$ , Pearson's correlation coefficient). (G and H) The intracellular HBV DNA and cccDNA were

evaluated by qPCR and Southern blot assays in HepaRG and HBV-infected HepaRG cells treated with pcDNA3.1 or pcDNA3.1-PCNAP1. (I and J) The EcoRI digested-DNA and EcoRI undigested-DNA were examined by Southern blot analysis to verify the cccDNA and rcDNA in the cells. Error bars represent means  $\pm$  SD (n=3). (K) Primary human hepatocytes (PHH) were infected with HBV and transfected with pcDNA3.1 or pcDNA3.1-PCNAP1. The levels of HBV DNA and cccDNA were measured by qPCR in the cells. (L) PHH were infected with HBV and transfected with siRNA targeting PCNAP1 or a negative control siRNA. The levels of HBV DNA and cccDNA were measured by qPCR in the cells. (M) The HepaRG cells were infected with HBV and transfected with siRNA targeting PCNAP1 or a negative control siRNA. The levels of HBV DNA and cccDNA were determined by qPCR in the cells. (N) The levels of HBV DNA and cccDNA were measured by qPCR in the HepG2.2.15 cells transfected with pcDNA3.1 or pcDNA3.1-PCNAP1. Statistical significant differences are indicated: \* $P$ <0.05; \*\* $P$ <0.01; \*\*\* $P$ <0.001; Student's  $t$  test.



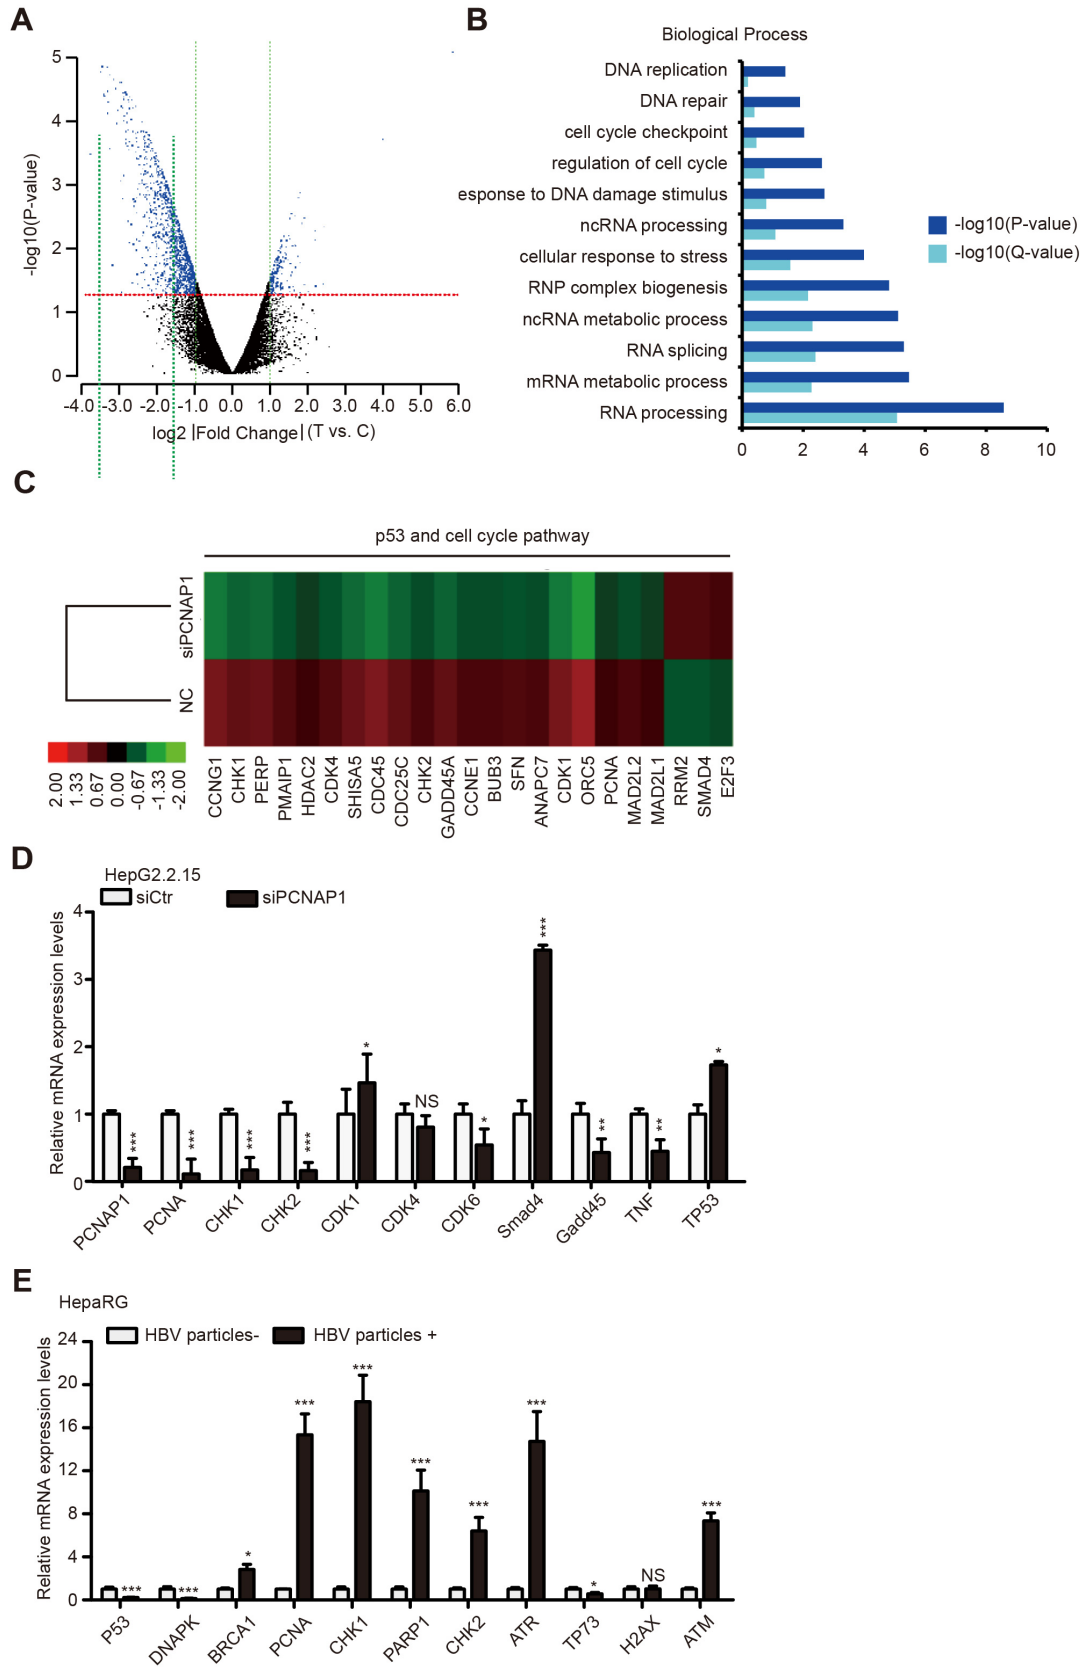

**Figure S3.** The global impact of PCNAP1 on host gene expression profiling in the presence of HBV. (A) Volcano plots depicted the relative fold change of gene expression in the

microarray when HepG2.2.15 cells were treated with siCtr and siPCNAP1. Up- and down-regulated genes were represented, respectively. (B) Gene ontology (GO) biological process analysis of the overlapping genes regulated by PCNAP1. The GO analysis was based on the DE list. (C) Heatmaps demonstrated the relative fold change of gene expression based on the cellular DNA damage repair and p53 pathway related genes by microarray. Red and green indicate increased and decreased expression, respectively. (D) Genes regulated by the microarray in HepG2.2.15 cells treated with siCtr and siPCNAP1 were confirmed by RT-qPCR. (E) The relative mRNA expression level of genes in DNA damage repair signaling were confirmed by RT-qPCR in HepaRG cells infected with or without HBV. Error bars represent means  $\pm$  SD (n=3). Statistical significant differences are indicated: \* $P$ <0.05; \*\* $P$ <0.01; \*\*\* $P$ <0.001; NS, no significance; Student's  $t$  test.

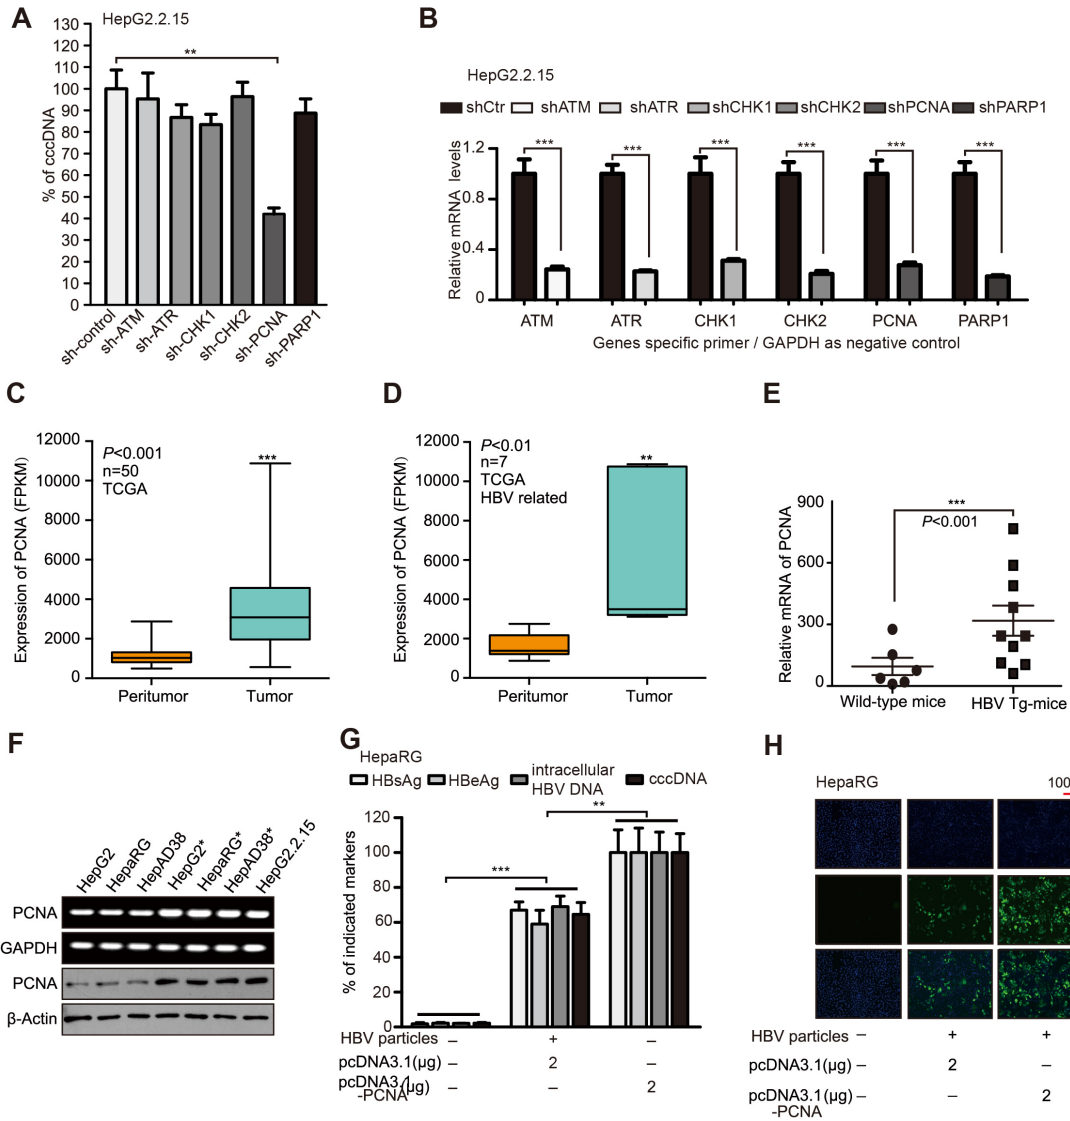

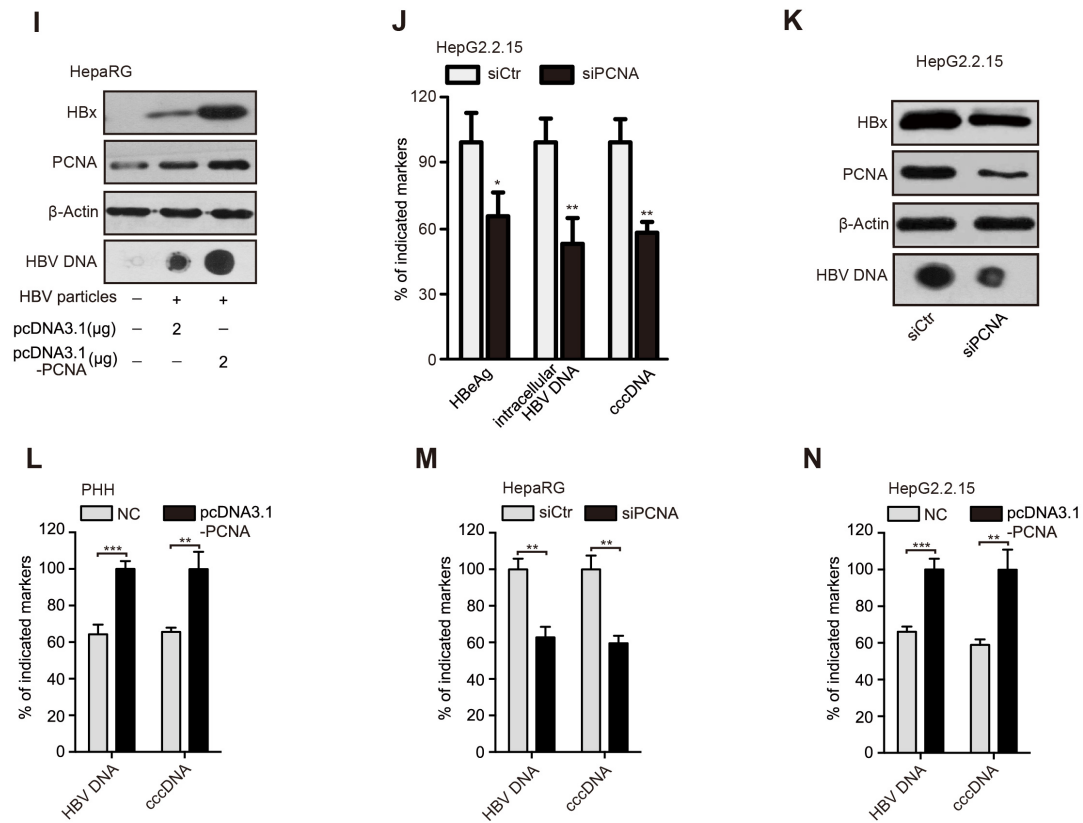

**Figure S4.** PCNAP1 contributes to HBV replicating and cccDNA accumulation through its ancestor PCNA. (A and B) shRNAs targeting different cellular DNA factors were transfected into HepG2.2.15 cells. The levels of HBV cccDNA and the efficiency of the shRNAs were measured by qPCR. (C) Expression of PCNA in 50 paired tumors and their adjacent nontumor parts of HCC patients in TCGA database. (D) Expression of PCNA in 7 paired tumors and their adjacent nontumor parts of HBV-related HCC patients in TCGA database. (E) The relative mRNA levels of PCNA were examined by RT-qPCR in liver tissues of wild type (n=6) and HBV-Tg mice (n=10) (\*\* $P < 0.001$ , Mann-Whitney U test). (F) The expression levels of PCNA in HBV free or HBV positive hepatoma cells were detected by RT-PCR and Western blot assays. The expression of PCNA was normalized to GAPDH and β-Actin. (G-I) In HepaRG and HBV-infected HepaRG cells treated with pcDNA3.1 or pcDNA3.1-PCNA, the levels of PCNA, HBx, HBcAg, HBsAg, HBeAg, HBV progeny DNA, intracellular HBV

DNA and cccDNA were measured by ELISA, qPCR, immunofluorescence staining and Western blot analysis or Dot blot assays. (J and K) The levels of HBeAg, intracellular HBV DNA, cccDNA, PCNA, HBx, and HBV progeny DNA were analysis by ELISA, qPCR, Western blot analysis or Dot blot assays in HepG2.2.15 cells transfected with sicontrol (siCtr) or siPCNA. (L) PHH were infected with HBV and transfected with pcDNA3.1 or pcDNA3.1-PCNA. The levels of HBV DNA and cccDNA were assessed by qPCR in the cells. (M) The HepaRG cells were infected with HBV and transfected with siRNA targeting PCNA or a negative control siRNA. The levels of HBV DNA and cccDNA were measured by qPCR in the cells. (N) The levels of HBV DNA and cccDNA were examined by qPCR in the HepG2.2.15 cells transfected with pcDNA3.1 or pcDNA3.1-PCNA. Error bars represent means  $\pm$  SD (n=3). Statistical significant differences are indicated: \* $P$ <0.05; \*\* $P$ <0.01; \*\*\* $P$ <0.001; Student's  $t$  test.

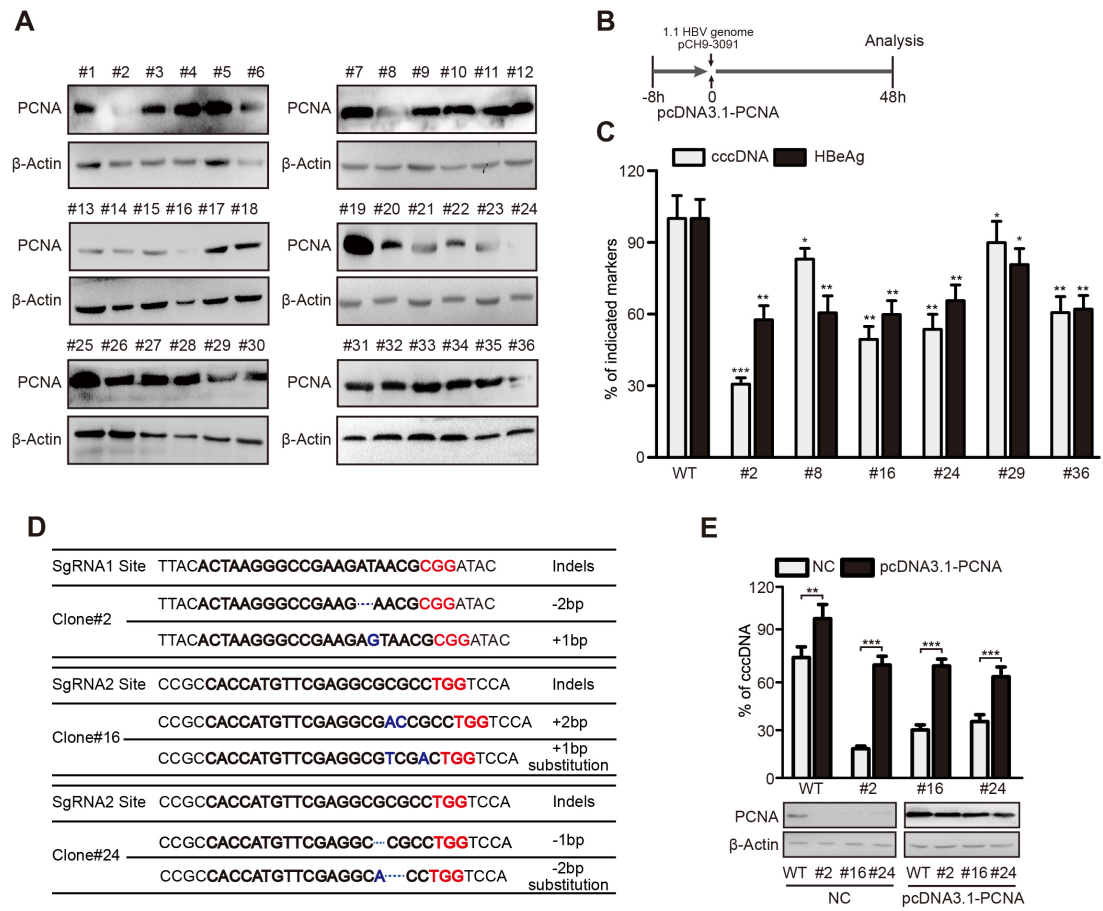

**Figure S5.** Depletion of PCNA impairs accumulation of cccDNA. (A) The expression of PCNA was measured by Western blot analysis in 36 cell clones derived from HepG2 cells (#1-#18 clones came from the sg1-selected cells and #19-#36 clones from the sg2-selected cells). (B) The scheme shows the procedure of treatment in HepG2#2 cells transfected with pcDNA3.1-PCNA. (C) HBV indicated markers including cccDNA and HBeAg were assessed by qPCR and ELISA assays in #2, #8, #16, #24, #29, and #36 cell clones, respectively. (D) Three clones were selected by length polymorphisms of PCR products and validated by Sanger sequencing. Clone 2 and Clone 16, Clone 24 were respectively generated by SgRNA1 and SgRNA2 that produced Clone2 with 2-bp deletion and 1+bp insertion, 2+bp insertion and 1+bp insertion/substitution for Clone 16 and 1-bp deletion and 2-bp deletion/substitution of Clone 24 for two alleles at different positions. (E) The levels of HBV cccDNA were

measured by qPCR in the indicated cells transfected with pcDNA3.1-PCNA. Error bars represent means  $\pm$  SD (n=3). Statistical significant differences are indicated: \* $P$ <0.05; \*\* $P$ <0.01; \*\*\* $P$ <0.001; Student's  $t$  test.

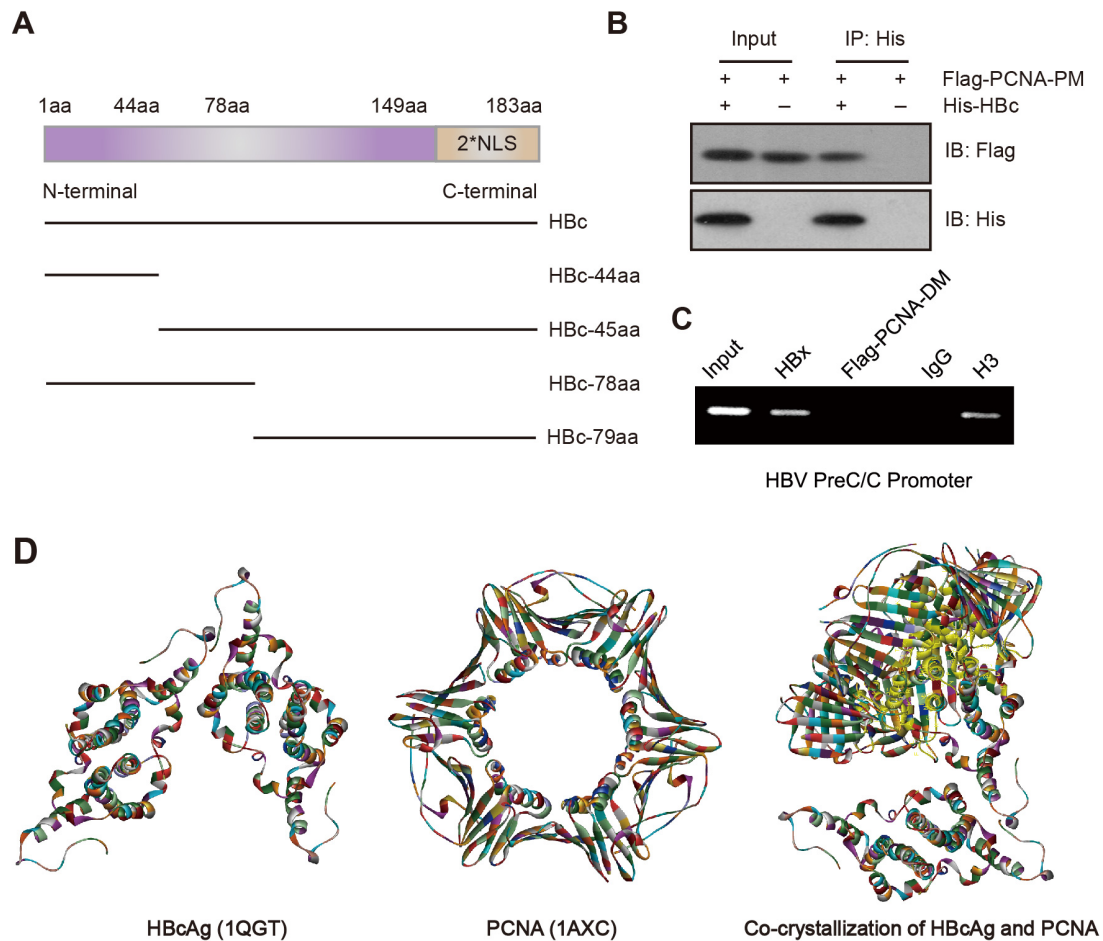

**Figure S6.** PCNA anchors onto cccDNA minichromosome through interacting with HBc. (A) The scheme of serial HBc mutants which were fused to 6xHis at C-terminus. (B) The interaction between serial HBc mutants and PCNA was identified by co-IP assays in HepG2 cells. (C) Cross-linked chromatin from HepAD38 cells transfected with flag-PCNA-DM was exogenously immunoprecipitated with the relevant control IgG or specific anti-HBx, anti-H3, and anti-flag antibodies and analyzed by PCR with HBV cccDNA selective primers. (D) A

three-dimensional co-crystallization structure of HBV core protein with PCNA has been generated by automatic modeling mode. The potential interaction sites (yellow) of modeled PCNA and HBc were depicted, in which the main domain of PCNA interacting with HBc was located in the  $\alpha$ -helix including amino acid 8-11, 13, 14, 17, 20-21, 76-85, 141-146 and the main domain of HBc was located in the  $\alpha$ -helix of C-terminus including amino acid 80-92, 107-130, 133, 142-143.

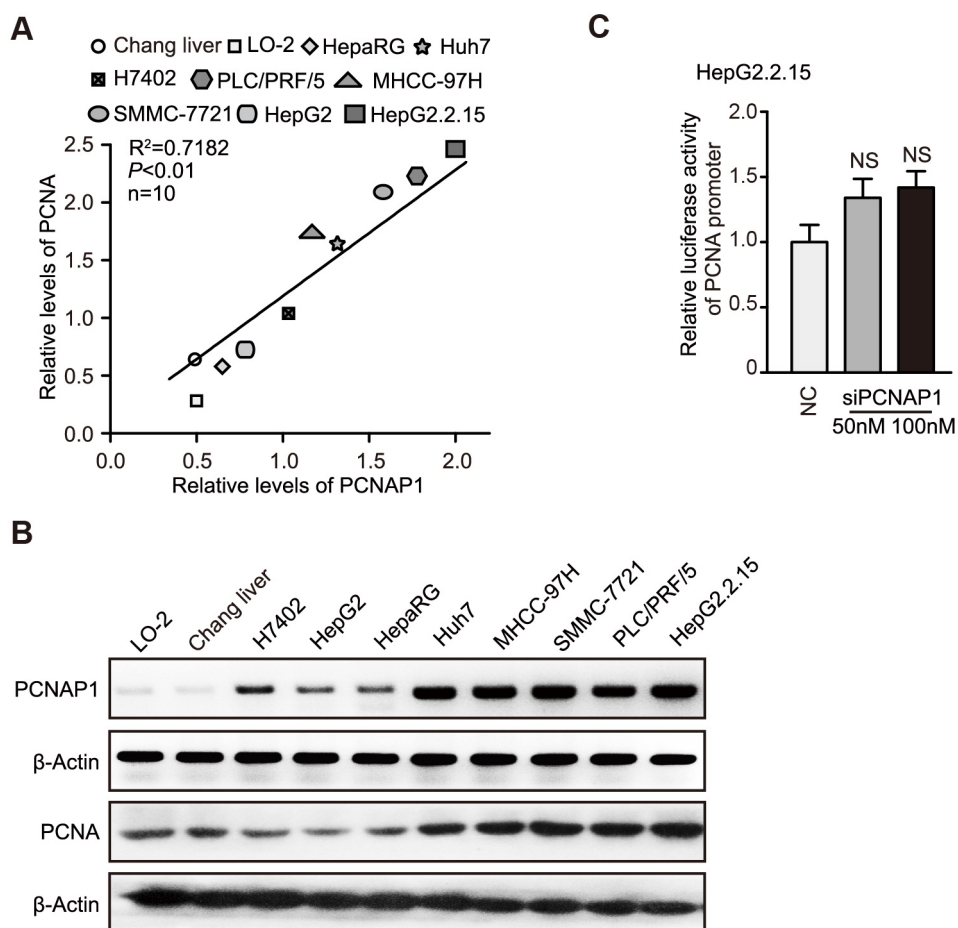

**Figure S7.** PCNAP1 stimulates the expression of PCNA at post-transcriptional level in hepatoma cells. (A) Correlation between the PCNAP1 RNA levels and the PCNA mRNA levels was examined by RT-qPCR in 10 liver cell lines. (B) The expression levels of PCNAP1 and PCNA were detected by RT-qPCR and Western blot analysis in 10 liver cell



lines, respectively. (C) Luciferase activities of PCNA promoter were measured by luciferase reporter gene assays in HepG2.2.15 cells transfected with siPCNAP1. Error bars represent means  $\pm$  SD (n=3). Statistical significant differences are indicated: NS, no significance; Student's *t* test.

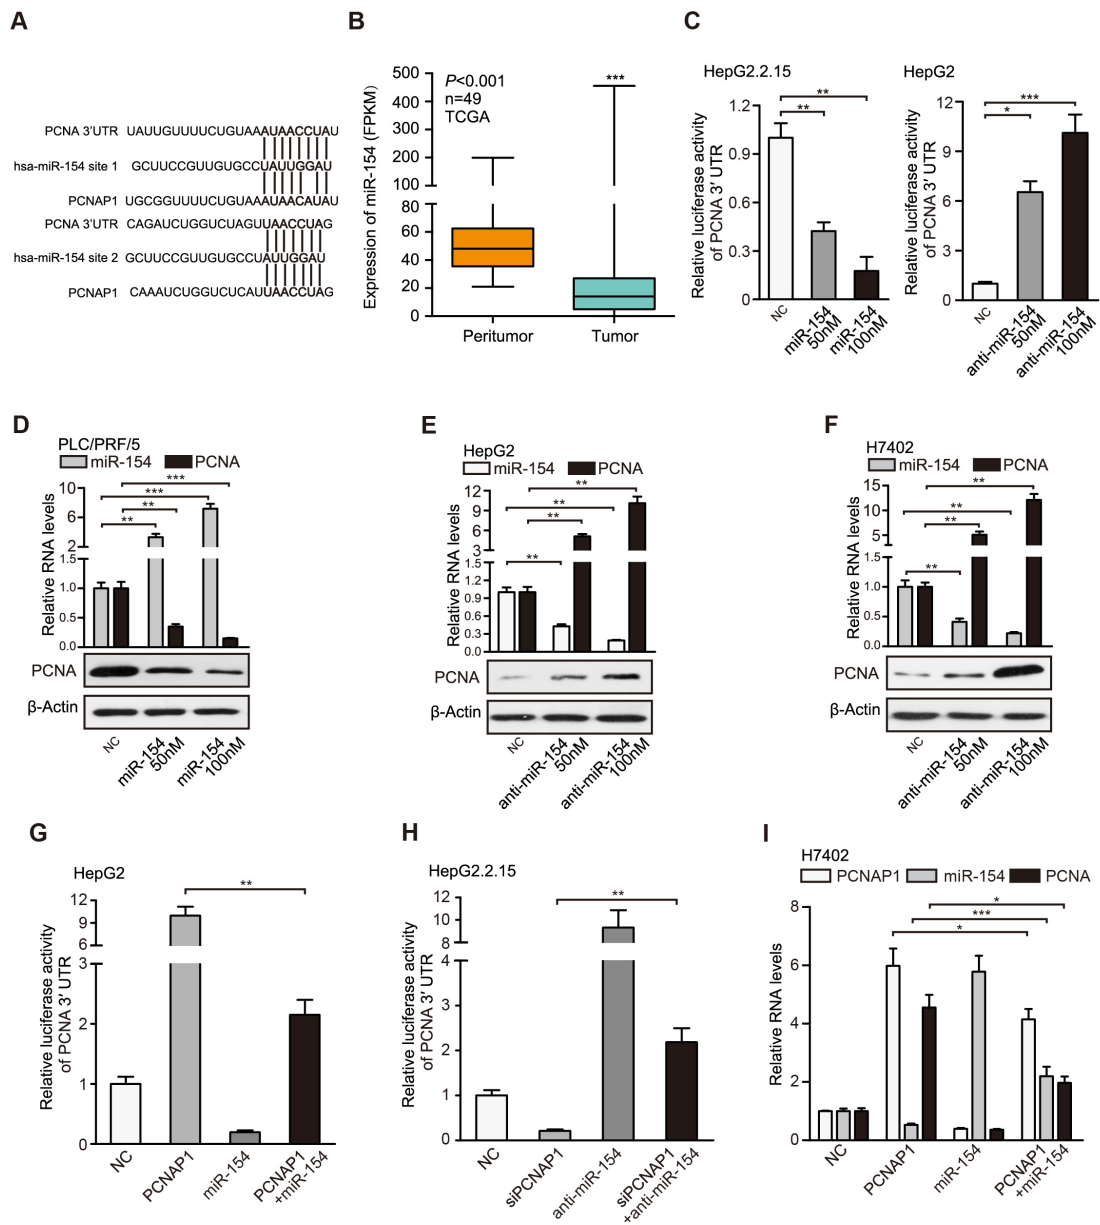

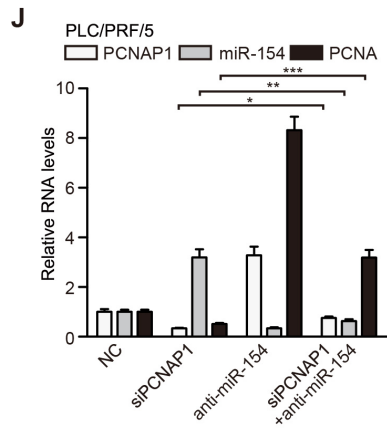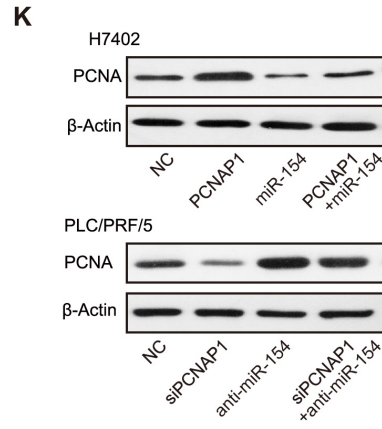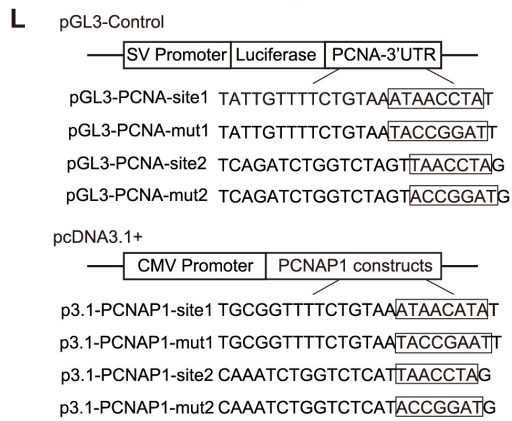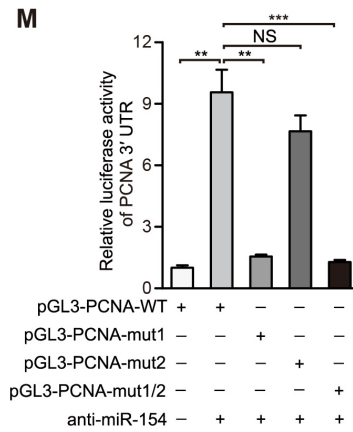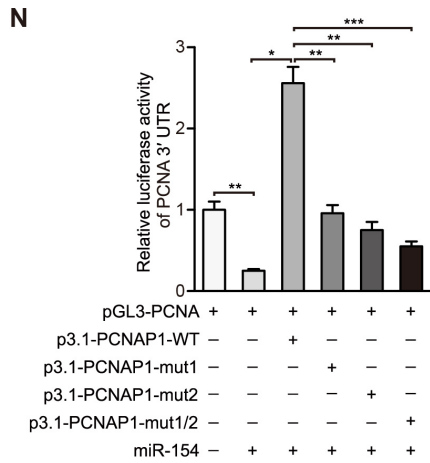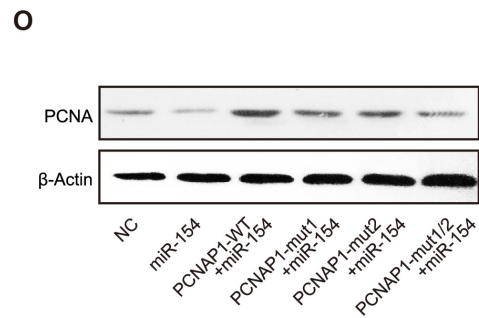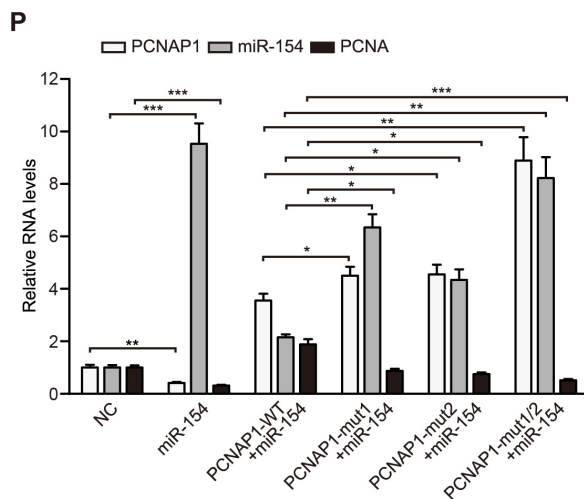

**Figure S8.** PCNAP1 up-regulates PCNA through competing for miR-154. (A) The binding sites of miR-154 in PCNA mRNA 3'UTR and PCNAP1 were shown. (B) Expression of miR-154 in 49 paired tumors and their adjacent nontumor parts of HCC patients was showed in TCGA database. (C) Luciferase activities of PCNA mRNA 3'UTR were tested in HepG2.2.15 cells transfected with miRNA control or miR-154, and in HepG2 cells transfected with control RNA and miR-154 inhibitors. (D-F) The relative levels of miR-154 and PCNA were examined by RT-qPCR and Western blot analysis in PLC/PRF/5 cells transfected with miR-154, and in HepG2 and H7402 cells transfected with miR-154 inhibitors, respectively. (G) Luciferase activities of PCNA mRNA 3'UTR were measured by luciferase reporter gene assays in HepG2 cells with the single treatment of PCNAP1 or miR-154 and the co-transfection with PCNAP1 and miR-154. (H) Luciferase activities of PCNA mRNA 3'UTR were measured as above in HepG2.2.15 cells with the single treatment of siPCNAP1 or anti-miR-154 and the co-transfection with siPCNAP1 and anti-miR-154. (I and J) The RNA levels of PCNAP1, miR-154 and PCNA were measured by RT-qPCR in H7402 and PLC/PRF/5 cells transfected with different regiments. (K) The protein levels of PCNA were detected by Western blot analysis in the cells with different treatments as above. (L) The binding sites of miR-154 in PCNA mRNA 3'UTR and PCNAP1 RNA region were shown and the mutants were generated at the regions as above indicated. The constructs of PCNA mRNA 3'UTR and PCNAP1 sequence were cloned into pGL3-control and pcDNA3.1+ plasmids, respectively. (M) Luciferase activities of mutants in PCNA mRNA 3'UTR were measured by luciferase reporter gene assays in HepG2 cells treated with different regiments. (N) The effect of miR-154 and the different PCNAP1 constructs on the luciferase activities of PCNA mRNA

3'UTR was examined by luciferase reporter gene assays in HepG2.2.15 cells, respectively. (O)

The expression levels of PCNA were tested by Western blot analysis in HepG2.2.15 cells

with different regiments as above. (P) The effect of miR-154 and the different PCNAP1

constructs on the expression levels of PCNA was examined by RT-qPCR in HepG2.2.15 cells.

Error bars represent means  $\pm$  SD (n=3). Statistical significant differences are indicated:

\* $P < 0.05$ ; \*\* $P < 0.01$ ; \*\*\* $P < 0.001$ ; NS, no significance, Student's *t* test.

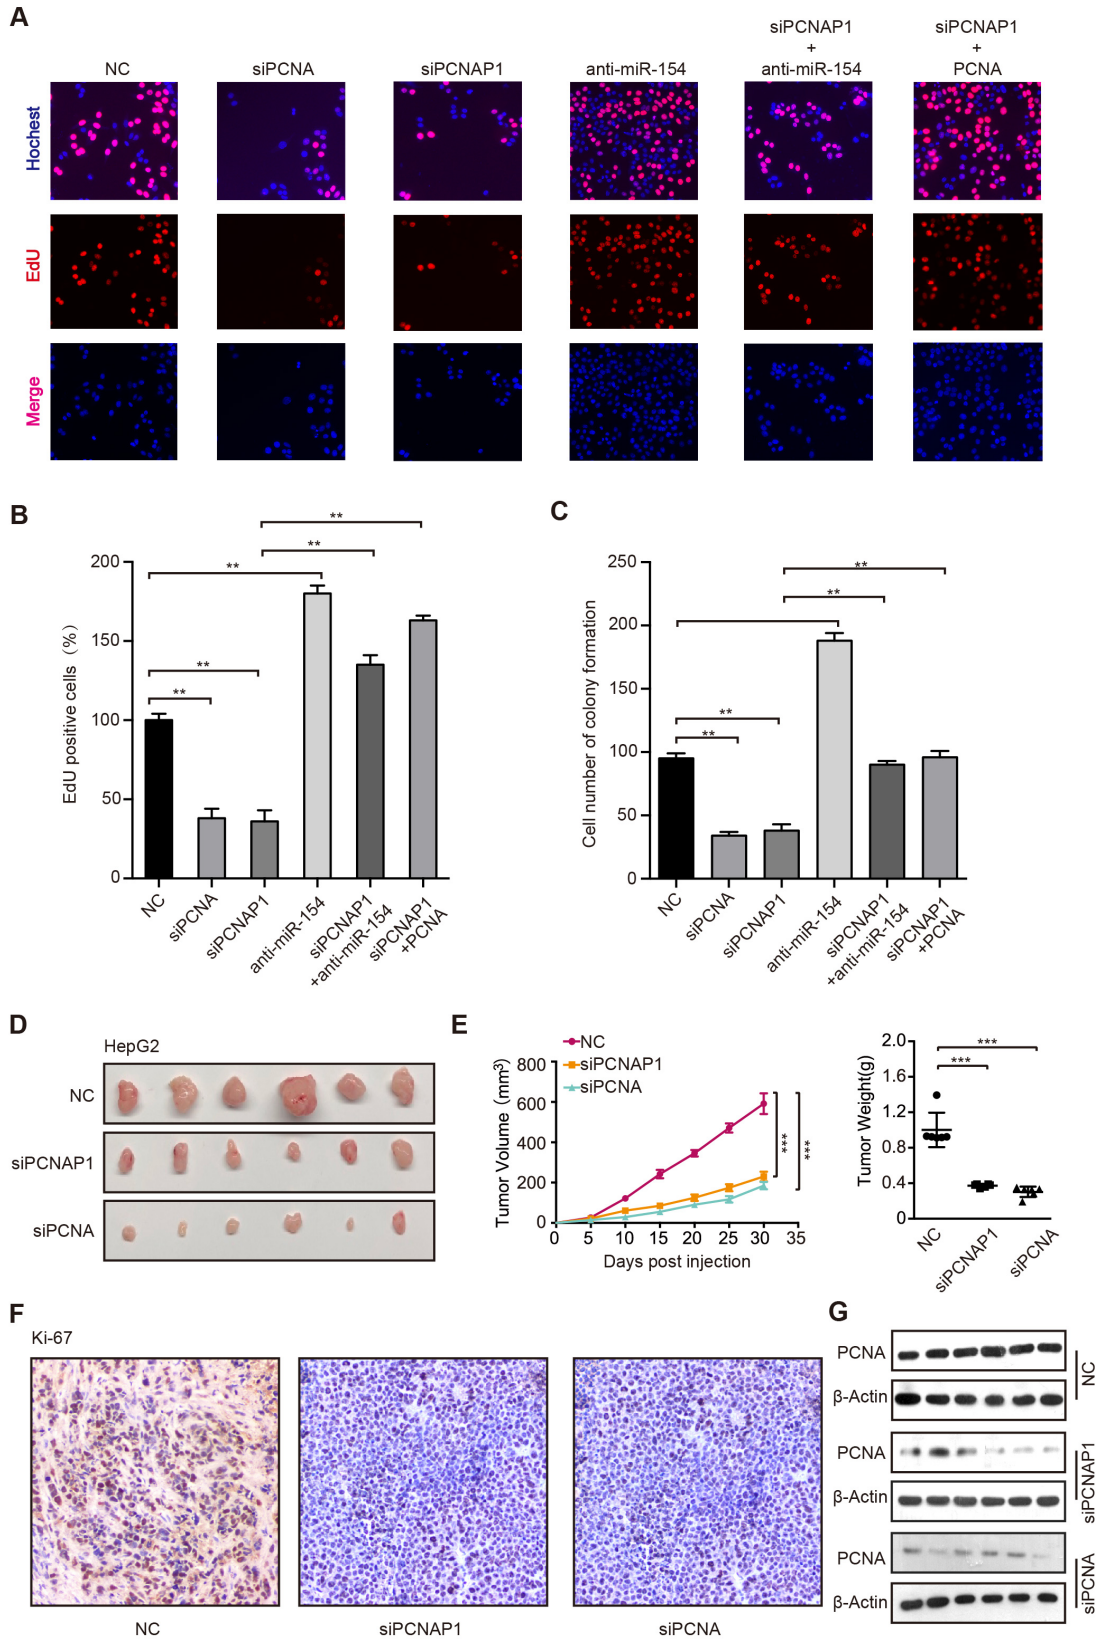

**Figure S9.** PCNAP1 and PCNA promotes the growth of hepatoma cells *in vitro*. (A and B)

EdU incorporation assays were applied to examine the EdU positive cells in HepG2.2.15 cells

transfected with indicated regiments. (C) Colony formation efficiencies were determined in HepG2.2.15 cells treated with different regiments as above. (D) Photographs of dissected tumors from nude mice injected with HepG2 cells treated with siCtr, siPCNAP1 or siPCNA. (E) The average volume and weight of the tumors transplanted with HepG2 cells pre-treated with siCtr, siPCNAP1 or siPCNA in nude mice. (F) Immunohistochemistry assays for Ki-67 were measured in tumor tissues from the nude mice treated as above. (G) The protein expression levels of PCNA were examined by Western blot analysis in the tumor tissues from nude mice, respectively. Error bars represent means  $\pm$  SD (n=3). Statistical significant differences are indicated: \*\* $P$ <0.01; \*\*\* $P$ <0.001, Student's  $t$  test.

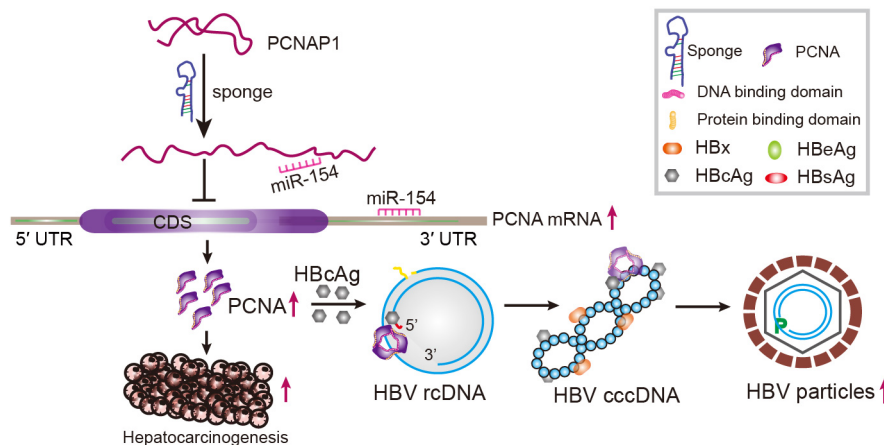

**Figure S10.** A model of PCNAP1 modulating HBV replication and enhancing hepatocarcinogenesis. In this model, PCNAP1/PCNA signaling promotes HBV replication by modulating HBV cccDNA accumulation. PCNAP1 as a natural sponge of miR-154 regulates its ancestral PCNA. HBc-recruited PCNA binds to HBV cccDNA, leading to HBV replication and cccDNA accumulation. Meanwhile, PCNAP1/PCNA signaling promotes hepatocarcinogenesis.

**Table S1. Information of human liver-chimeric mice**

| <b>Group</b>  | <b>Mouse (No.)</b> | <b>Albumin (<math>\mu\text{g/mL}</math>)</b> | <b>HBV (IU/mL)</b> |
|---------------|--------------------|----------------------------------------------|--------------------|
| Control       | 10.16-14           | 1916.18                                      | —                  |
|               | 10.16-15           | 2065.83                                      | —                  |
|               | 10.16-19           | 3242.68                                      | —                  |
| HBV infection | 7.25-13            | 1093.72                                      | 7.81E+05           |
|               | 7.25-15            | 1571.23                                      | 4.20E+06           |
|               | 8.10-15            | 630.57                                       | 5.82E+06           |

**Table S2. The characteristics of patients**

| No. | Age | Gender | Organ | HBV | cccDNA |
|-----|-----|--------|-------|-----|--------|
| 1   | 59  | F      | Liver | +   | +      |
| 2   | 60  | M      | Liver | +   | -      |
| 3   | 65  | M      | Liver | +   | +      |
| 4   | 43  | M      | Liver | +   | +      |
| 5   | 60  | F      | Liver | +   | -      |
| 6   | 41  | M      | Liver | +   | +      |
| 7   | 45  | M      | Liver | +   | +      |
| 8   | 56  | M      | Liver | +   | -      |
| 9   | 70  | M      | Liver | +   | -      |
| 10  | 67  | M      | Liver | +   | +      |
| 11  | 59  | M      | Liver | +   | +      |
| 12  | 57  | M      | Liver | +   | +      |
| 13  | 61  | F      | Liver | +   | -      |
| 14  | 51  | F      | Liver | +   | +      |
| 15  | 56  | M      | Liver | +   | +      |
| 16  | 60  | M      | Liver | +   | -      |
| 17  | 54  | M      | Liver | +   | +      |
| 18  | 36  | M      | Liver | +   | -      |
| 19  | 46  | M      | Liver | +   | +      |
| 20  | 60  | M      | Liver | +   | +      |
| 21  | 59  | M      | Liver | +   | -      |
| 22  | 57  | F      | Liver | +   | +      |
| 23  | 51  | M      | Liver | +   | -      |
| 24  | 38  | M      | Liver | +   | +      |
| 25  | 56  | M      | Liver | +   | -      |
| 26  | 49  | M      | Liver | +   | +      |
| 27  | 58  | F      | Liver | +   | -      |
| 28  | 46  | M      | Liver | +   | +      |
| 29  | 56  | M      | Liver | +   | +      |
| 30  | 54  | M      | Liver | +   | -      |
| 31  | 39  | M      | Liver | +   | -      |
| 32  | 53  | M      | Liver | +   | +      |
| 33  | 60  | M      | Liver | +   | +      |



---

|    |    |   |       |   |   |
|----|----|---|-------|---|---|
| 34 | 66 | M | Liver | + | - |
| 35 | 60 | F | Liver | + | + |
| 36 | 59 | M | Liver | + | - |
| 37 | 69 | M | Liver | + | + |
| 38 | 38 | M | Liver | + | + |
| 39 | 56 | M | Liver | + | + |
| 40 | 53 | F | Liver | - | - |
| 41 | 47 | M | Liver | - | - |
| 42 | 67 | M | Liver | - | - |
| 43 | 49 | M | Liver | - | - |

---

**Table S3. List of primers used in this paper**

| Gene           | Primer  | Sequence(5'-3')             |
|----------------|---------|-----------------------------|
| <b>RT-qPCR</b> |         |                             |
| Mouse PCNA     | forward | ATGTTTGAGGCACGCCTGATCCAG    |
|                | reverse | CTAAGATGCTTCCTCACTCAATC     |
| Mouse GAPDH    | forward | CCTGCCAAGTATGATGACAT        |
|                | reverse | GTTGCTGTAGCCGTATTCA         |
| PCNA           | forward | AACCTCACCAGTATGTCC          |
|                | reverse | CCATTTCCAAGTTCTCCAC         |
| HBx            | forward | ATGGCTGCTAGGCTGTGC          |
|                | reverse | TTAGGCAGAGGGGAAAAAGTTG      |
| PCNAP1         | forward | CACTCCACTCTCTTCC            |
|                | reverse | CAGAAAACCGCATCTACC          |
| ATM            | forward | CAGGGTAGTTTAGTTGAGGTTGACAG  |
|                | reverse | CTATACTGGTGGTCAGTGCCAAAGT   |
| ATR            | forward | TGCTGTACTCTTCACGGCATGTT     |
|                | reverse | AAGAGGTCCACATGTCCGTGTT      |
| CHK1           | forward | GGTGAATATAGTGCTGCTATGTTGACA |
|                | reverse | TTGGATAAACAGGGAAGTGAACAC    |
| CHK2           | forward | CCCAAGGCTCCTCCTCACA         |
|                | reverse | AGTGAGAGGACTGGCTGGAGTT      |
| P53            | forward | GGAGGTTGGCTCTGACTGTACC      |
|                | reverse | TCCGTCCCAGTAGATTACCAC       |
| TP73           | forward | GCACCACGTTTGAGCACCTCTGG     |
|                | reverse | AGATGTAGTCATGCCCTCCAGGTG    |
| H2AX           | forward | ACTCAACTCGGCAATCCAAG        |
|                | reverse | GGGTTAGCTGCAGAATTCCA        |
| DNAPK          | forward | AAAATTGGTACCCCCGACAG        |
|                | reverse | TTCTCATGACCCAGGAGTAGC       |
| PARP1          | forward | GCCCTAAAGGCTCAGAACGACC      |
|                | reverse | TCCAAGATCGCCGACTCCC         |
| BRCA1          | forward | AGCTCGCTGAGACTTCCTGGA       |
|                | reverse | CAATCAATGTAGACAGACGT        |
| Gadd45a        | forward | TGGTGACGAATCCACATTCA        |
|                | reverse | CACTGGAACCCATTGATCC         |
| CDK1           | forward | TCCCTCCTGGTCAGTACATGG       |
|                | reverse | ACAAAACACAATCCCCTGTAGG      |
| Smad4          | forward | TGAAGGAATCATTCCAGTGCTAG     |
|                | reverse | CTTGGTAAAATTAATCACCACACA    |
| CDK4           | forward | ATGGCTACCTCTCGATATGAGC      |
|                | reverse | CATTGGGGACTCTCACACTCT       |
| CDK6           | forward | GCTGACCAGCAGTACGAATG        |
|                | reverse | GCACACATCAAACAACCTGACC      |
| TNF            | forward | CCTCTCTTAATCAGCCCTCTG       |

|                             |         |                                        |
|-----------------------------|---------|----------------------------------------|
|                             | reverse | GAGGACCTGGGAGTAGATGAG                  |
| 18S                         | forward | AACCCGTTGAACCCATT                      |
|                             | reverse | CCATCCAATCGGTAGTAGCG                   |
| GAPDH                       | forward | AACGGATTTGGTCGTATTG                    |
|                             | reverse | GGAAGATGGTGATGGGATT                    |
| miR-154                     | forward | TAGGTTATCCGTGTTGCCTTCG                 |
|                             | reverse | GCGAGCACAGAATTAATACGAC                 |
| U6                          | forward | CTCGCTTCGGCAGCACA                      |
|                             | reverse | AACGCTTACGAATTTGCGT                    |
| <b>Luciferase assay</b>     |         |                                        |
| pGL3-PCNA-3'UTR             | forward | TGCTCTAGAGCATTCTTAAAATTCAAGAAAA        |
|                             | reverse | GGGGGCCGGCCTGATGTTTGAAATTCAAGTAACT     |
| pGL3-PCNA-promoter          | forward | GGGGTACCTAAAACCAATCCCTACCTTCCTTAA      |
|                             | reverse | CCCTCGAGTGGCGCTTCTCGCCCTC              |
| pGL3-PCNA-mut1              | forward | TATTGTTTTCTGTAATACCGGATTTTTTTTCTC      |
|                             | reverse | GAGAAAAAAAATCCGGTATTACAGAAAACAATA      |
| pGL3-PCNA-mut2              | forward | ATCTGGTCTAGTATCGGACGAAGTATTTTTGTC      |
|                             | reverse | GACAAAATACTTCGTCCGATACTAGACCAGAT       |
| <b>CHIP assay</b>           |         |                                        |
| PreC/HBc promoter           | forward | CTGAATCCTGCGGACGACCC                   |
|                             | reverse | CCCAAGGCACAGCTTGGAGG                   |
| <b>Plasmid construction</b> |         |                                        |
| pcDNA3.1-PCNA               | forward | CGGGGTACCATGTTTCGAGGCGCGCCTGGT         |
|                             | reverse | CCGCTCGAGCTAAGATCCTTCTTCATCCTCGATC     |
| pcDNA3.1-PCNAP1             | forward | GGGGTACCAGGCCTGCTGGGACAAC              |
|                             | reverse | CGGAATTCCTTAAAATTCAGATTAAACTTTATT      |
| pcDNA3.1-PCNAP2             | forward | GGGGTACCAGCAGGCTTGTGGAAAACATGAAAACCT   |
|                             | reverse | CGGAATTC AATAGCATT AATTAATTCATGAAGGT   |
| pcDNA3.1-PCNAP3             | forward | CCCATATGGTTGTCATTCTAGGTCTCAGCCT        |
|                             | reverse | CGGGATCCAGATCTGACTGACTTTGGACTTTA       |
| pcDNA3.1-PCNAP4             | forward | GGGGTACCATGTTTCGAGGTACACCTGGTCCAGG     |
|                             | reverse | CGGAATTC AAAAAAAGTCCCATATTAGCAATGTT    |
| pcDNA3.1-PCNAP1-mut1        | forward | TGCGGTTTCTGTAAGCCCAGACT                |
|                             | reverse | AGTCTGGGCTTACAGAAAACCGCA               |
| pcDNA3.1-PCNAP1-mut2        | forward | CAAATCTGGTCTCATT AACCTAG               |
|                             | reverse | CTAGGTTAATGAGACCAGATTTG                |
| pCMV-PCNA-WT                | forward | ATAGGATCCATGTTTCGAGGCGCGCCTGGT         |
|                             | reverse | GCACTCGAGAGATCCTTCTTCATCCTCGATCTTGG    |
| pCMV-PCNA-DM                | forward | TGCCGGCGCAGTAGGTGTGAAGCCCTCAGACCGCA    |
|                             | reverse | CGACACCTACTGCGCCGGAATGAAGATATCATTACAC  |
| pCMV-PCNA-PM                | forward | TCTTTACTACCATTTTCATAGTCTGAACTTTCTCCTG  |
|                             | reverse | CTATGAAATGGTAGTAAAGATGCCTTCTGGTGAATTTG |
| pcDNA4.0-HBc-WT             | forward | ACGGGATCCATGGACATCGACCCTTATAAAGA       |
|                             | reverse | CCGCTCGAGACATTGAGATTCCCAGATTGA         |

|                               |         |                                                                |
|-------------------------------|---------|----------------------------------------------------------------|
| pcDNA4.0-HBc (1-44)           | forward | ACGGGATCCATGGACATCGACCCCTATAAAGA                               |
|                               | reverse | CCGCTCGAGAGACTCTAAGGCTTCCCGATACA                               |
| pcDNA4.0-HBc (1-78)           | forward | ACGGGATCCATGGACATCGACCCCTATAAAGA                               |
|                               | reverse | CCGCTCGAGATCTTCCAAATTAACACCCACCC                               |
| pcDNA4.0-HBc (45-183)         | forward | ACGGGATCCATGCCTGAGCATTGTTACCTCACC                              |
|                               | reverse | CCGCTCGAGACATTGAGATTCCCAGATTGA                                 |
| pcDNA4.0-HBc (79-183)         | forward | ACGGGATCCATGCCAGCGTCTAGAGACCTAGTAG                             |
|                               | reverse | CCGCTCGAGACATTGAGATTCCCAGATTGA                                 |
| PCH9/3091-HBx-mut1            | forward | GCGTCGACGCACCATGCAACTTTTTTCACCTC                               |
|                               | reverse | CAGCCTAGCAGCTGTGGAAACGATGT                                     |
| PCH9/3091-HBx-mut2            | forward | ACATCGTTTCCACAGCTGCTAGGCTG                                     |
|                               | reverse | CGCCCGGGGATCTCGTACTGAAGGAAAGAAG                                |
| pmCherry-C1-PCNA              | forward | GCGTCGACATGTTTCGAGGCGCGCCTG                                    |
|                               | reverse | CGGGATCCCTAAGATCCTTCTTCATCCTCGATC                              |
| pEGFP-n1-HBc                  | forward | CGGCTAGCATGGACATTGACCCGTAT                                     |
|                               | reverse | CCAAGCTTACATTGAGATTCCCAGAT                                     |
| pcDNA3.1-HBx                  | forward | CCCAAGCTTATGGCTGCTAGGCTGTGCT                                   |
|                               | reverse | CCGCTCGAGTTAGGCAGAGGTGAAAAAGTTG                                |
| <b>CRISPR</b>                 |         |                                                                |
| PCNA-sgRNA-1                  | forward | CACCGACTAAGGGCCGAAGATAACG                                      |
|                               | reverse | AAACCGTTATCTTCGGCCCTTAGTC                                      |
| PCNA-sgRNA-2                  | forward | CACCGGCGCGCCTCGAACATGGTGG                                      |
|                               | reverse | AAACCCACCATGTTTCGAGGCGCGCC                                     |
| PCNA-sanger-PCR-1             | forward | GTCTCCTGTCTTCTAGTATGTCC                                        |
|                               | reverse | CTATGACATAACTATCGTGCCTGTG                                      |
| PCNA-sanger-PCR-2             | forward | CATGGACACGATTGGCCCTAAAGTC                                      |
|                               | reverse | GGTTTACACCGCTGGAGCTAATATC                                      |
| <b>HBV cccDNA assay</b>       |         |                                                                |
| cccDNA                        | forward | GCCTATTGATTGGAAAGTATGT                                         |
|                               | reverse | AGCTGAGGCGGTATCTA                                              |
| rcDNA                         | forward | GTTGCCCGTTTGTCTCTAATTC                                         |
|                               | reverse | GGAGGGATACATAGAGGTTCCCTTGA                                     |
| <b>pSilencer-construction</b> |         |                                                                |
| pSilencer-ATM                 | forward | GATCCGAAGGAAGCCAGAGTACAATTCAAGAGATTGTA                         |
|                               | reverse | AGCTTAAAAAGAAGGAAGCCAGAGTACAATCTCTTGA                          |
| pSilencer-ATR                 | forward | GATCCGGTCAGCTGTCTACTGTTATTCAAGAGATAACAGTAGACAGCTGACCTTTTTTA    |
|                               | reverse | AGCTTAAAAAGGTCAGCTGTCTACTGTTATCTCTTGAATAACAGTAGACAGCTGACCG     |
| pSilencer-CHK1                | forward | GATCCAAGGGATAACCTCAAAATCTCTTCAAGAGAGAGATTTGAGGTTATCCCTTTTTTTA  |
|                               | reverse | AGCTTAAAAAAGGGATAACCTCAAAATCTCTCTCTTGAAGAGATTTTGAGGTTATCCCTTG  |
| pSilencer-CHK2                | forward | GATCCGAGGACTGTCTTATAAAGATTTTCAAGAGAAATCTTTATAAGACAGTCCTCTTTTTA |
|                               | reverse | AGCTTAAAAAGAGGACTGTCTTATAAAGATTTCTCTTGA                        |
| pSilencer-PARP1               | forward | GATCCGGAGGCAAGTTGACAGGATCTTCAAGAGAAGATCCTGTCAACTTGCCTCCTTTTTA  |
|                               | reverse | AGCTTAAAAAGGAGGCAAGTTGACAGGATCTTCTCTTGA                        |
| pSilencer-PCNA                | forward | GATCCGATCGAGGATGAAGAAGGATTCAAGAGATCCTTCTTCATCCTCGATCTTTTTA     |

---

reverse

AGCTTAAAAAGATCGAGGATGAAGAAGGATCTTGAATCCTTCTTCATCCTCGATCG

---

**Table S4. List of antibody used in this paper**

| <b>Gene</b>                        | <b>Manufacture</b> | <b>Catalog Number</b> | <b>RRID Number</b> |
|------------------------------------|--------------------|-----------------------|--------------------|
| PCNA Polyclonal Antibody           | Proteintech        | 10205-2-AP            | AB_2160330         |
| HBx Polyclonal Antibody            | Abcam              | ab39716               | AB_880382          |
| HBc Monoclonal Antibody            | Abcam              | ab8638                | AB_306685          |
| IgG Polyclonal Antibody            | Abcam              | ab6789                | AB_955439          |
| Flag tag Monoclonal Antibody       | Sigma-Aldrich      | SAB4200071            | AB_10603396        |
| His tag Monoclonal Antibody        | Abcam              | ab18184               | AB_444306          |
| Anti Digoxigenin AP Conjugate      | Roche              | 11 745 832 910        | N/A                |
| Histone H3 antibody                | Proteintech        | 17168-1-AP            | N/A                |
| Ki-67 Polyclonal Antibody          | Proteintech        | 19972-1-AP            | N/A                |
| $\beta$ -actin Monoclonal Antibody | Sigma-Aldrich      | A2228                 | AB_476697          |

**Table S5-1, related to Figure S3. List of genes regulated by PCNAP1**

| <b>Gene_Symbol</b>          | <b>Normalized Intensity</b> |                      | <b>log2 (Ratio)</b> | <b>P-value</b> |
|-----------------------------|-----------------------------|----------------------|---------------------|----------------|
| <b>Upreg<sup>gene</sup></b> | <b>C<sup>a</sup></b>        | <b>T<sup>b</sup></b> | <b>T/C</b>          | <b>T/C</b>     |
| CLC                         | 576.455078                  | 1689.33325           | 1.552657            | 0.015617166    |
| PSMD1                       | 14113.9111                  | 30434.1543           | 1.015531            | 0.026166514    |
| NETO2                       | 1039.28198                  | 2802.11328           | 1.428792            | 0.012824742    |
| CHAMP1                      | 2692.89502                  | 5769.89014           | 1.067938            | 0.030823622    |
| COPRS                       | 6065.71143                  | 13249.8213           | 1.069367            | 0.023324579    |
| SIAE                        | 4719.72559                  | 14591.4795           | 1.581546            | 0.002349261    |
| DHCR7                       | 1708.11768                  | 4119.79346           | 1.259644            | 0.017256772    |
| ZBED5                       | 3976.9856                   | 8241.7666            | 1.005716            | 0.035061438    |
| ATP6V0A2                    | 559.826538                  | 1375.44421           | 1.300181            | 0.041219       |
| TAF5L                       | 2231.91577                  | 4909.96533           | 1.116275            | 0.027351558    |
| RC3H1                       | 1464.23279                  | 3906.17432           | 1.407222            | 0.01023556     |
| PGR                         | 70.209274                   | 438.136749           | 2.429527            | 0.033116214    |
| HERC3                       | 387.074799                  | 1353.64636           | 1.812656            | 0.015059801    |
| LIMK1                       | 1635.13696                  | 3827.70215           | 1.217828            | 0.021322561    |
| PDGFC                       | 1898.42175                  | 4100.17529           | 1.09771             | 0.032467507    |
| LBH                         | 612.483521                  | 1496.42224           | 1.291802            | 0.038499329    |
| PROS1                       | 12621.9639                  | 26885.4648           | 1.006092            | 0.027702894    |
| TP53INP1                    | 5757.16016                  | 15520.0674           | 1.379741            | 0.005536321    |
| SMAD4                       | 4176.52783                  | 10186.1338           | 1.236573            | 0.011962708    |
| BCLAF1                      | 7040.32715                  | 16661.1855           | 1.188194            | 0.012917436    |
| ACADSB                      | 2622.68579                  | 5382.97852           | 1.00882             | 0.040421493    |
| APPBP2                      | 1860.54565                  | 3947.59033           | 1.073074            | 0.036491249    |
| UBTF                        | 954.291809                  | 2185.23413           | 1.198415            | 0.035524588    |
| SNCB                        | 242.037216                  | 1117.13965           | 2.217303            | 0.006381562    |
| UBE2Q2                      | 5711.89355                  | 12107.6143           | 1.024896            | 0.029058373    |
| LLGL1                       | 399.08429                   | 1207.60071           | 1.603818            | 0.021724021    |
| WDR44                       | 1907.65979                  | 4445.6709            | 1.206349            | 0.020218035    |
| SIX2                        | 3976.06177                  | 10303.8428           | 1.324491            | 0.008109604    |
| TRMT1L                      | 659.597595                  | 2122.02051           | 1.683054            | 0.00782767     |
| P2RY8                       | 367.674866                  | 1183.62317           | 1.696489            | 0.017822659    |
| PANK1                       | 1579.70862                  | 4326.87256           | 1.443346            | 0.008216402    |
| PHTF2                       | 1382.93787                  | 2856.60791           | 1.042552            | 0.04969389     |
| UBE2D1                      | 1039.28198                  | 2641.89917           | 1.345497            | 0.018119512    |
| CALCOCO2                    | 1063.3009                   | 2261.52661           | 1.093051            | 0.049098738    |
| NDUFA2                      | 10676.4277                  | 23577.6426           | 1.064143            | 0.021518955    |
| TEAD2                       | 1372.776                    | 4011.8938            | 1.539123            | 0.006131922    |
| STK3                        | 1265.6145                   | 3073.49658           | 1.275864            | 0.020274013    |
| ARHGAP11A                   | 1010.64398                  | 2273.51562           | 1.172805            | 0.037382033    |
| TBX1                        | 3325.70239                  | 7304.45898           | 1.093639            | 0.02512487     |
| DMXL1                       | 2015.74512                  | 4379.1875            | 1.103736            | 0.030564927    |
| ACR                         | 206.008774                  | 1140.02747           | 2.466735            | 0.003887494    |

|              |            |            |          |             |
|--------------|------------|------------|----------|-------------|
| CCDC167      | 3867.97656 | 8188.36133 | 1.036864 | 0.03074556  |
| FOXQ1        | 13435.8369 | 28622.7539 | 1.003406 | 0.027858576 |
| RETNLB       | 151.504211 | 598.350891 | 1.933814 | 0.035001669 |
| PROSER1      | 6482.34814 | 13705.3965 | 1.021346 | 0.02871665  |
| SYNC         | 2773.26611 | 10097.8525 | 1.81962  | 0.001071791 |
| OR5P3        | 224.484909 | 708.430054 | 1.654198 | 0.043075189 |
| FABP1        | 677.149963 | 2610.29224 | 1.938302 | 0.002745164 |
| GPATCH4      | 10521.2285 | 23171.1113 | 1.061796 | 0.021806203 |
| PTRHD1       | 14744.8711 | 32428.6582 | 1.037804 | 0.023434993 |
| MZB1         | 448.969818 | 1237.02783 | 1.465286 | 0.029967848 |
| EXOSC6       | 1707.19385 | 3514.90283 | 1.033182 | 0.045353331 |
| KCNH6        | 523.798096 | 1332.93835 | 1.350785 | 0.037147928 |
| PRPS2        | 2683.65698 | 6039.09375 | 1.137354 | 0.022667473 |
| NPY6R        | 152.428024 | 555.845093 | 1.819332 | 0.04725837  |
| GIPC2        | 3416.23535 | 7399.2793  | 1.072972 | 0.027298505 |
| RDH11        | 875.76825  | 2199.40283 | 1.329745 | 0.022859724 |
| TRAPPC2L     | 4437.96484 | 9377.43457 | 1.029911 | 0.030386703 |
| SLC27A1      | 710.406982 | 2610.29224 | 1.869833 | 0.00335685  |
| ZIC2         | 1770.93652 | 4216.79346 | 1.240077 | 0.018326966 |
| ENTPD7       | 287.303711 | 1324.21924 | 2.222632 | 0.004459913 |
| SREK1        | 903.482483 | 1983.60413 | 1.139311 | 0.046830792 |
| CBX2         | 314.094116 | 901.341003 | 1.532165 | 0.039075837 |
| FAM13B       | 2548.78125 | 6030.37451 | 1.211148 | 0.016705578 |
| PPM1B        | 2802.82788 | 5857.08154 | 1.030613 | 0.035706308 |
| HERPUD2      | 3133.55054 | 6751.8833  | 1.069069 | 0.028739458 |
| ASB16        | 820.339905 | 2511.11206 | 1.610293 | 0.007898513 |
| RAB4A SPHAR  | 505.321991 | 1281.7135  | 1.346234 | 0.039344627 |
| SAA4 SAA2-SA | 5522.51318 | 13412.2158 | 1.225632 | 0.011511652 |
| A4           |            |            |          |             |
| E2F3         | 2365.86768 | 5241.29248 | 1.122727 | 0.02577517  |
| LMAN2L       | 122.866226 | 611.429626 | 2.232085 | 0.036646321 |
| NDUFB3       | 1751.5365  | 4031.51196 | 1.191971 | 0.022753332 |
| BRCC3        | 4148.81348 | 8716.95898 | 1.024141 | 0.031839866 |
| RLN2         | 106.237709 | 471.923401 | 2.040044 | 0.045330923 |
| PRKAR1A      | 13598.4268 | 28957.3516 | 1.002215 | 0.02797894  |
| NTF4         | 323.332153 | 924.22876  | 1.525904 | 0.0382559   |
| BHLHE22      | 2105.35425 | 4820.59424 | 1.176198 | 0.021725634 |
| LBR          | 8083.3042  | 19976.6367 | 1.244189 | 0.009619867 |
| DPP8         | 3534.48242 | 7562.76318 | 1.054651 | 0.029277664 |
| MMD          | 9782.18359 | 23213.6172 | 1.170583 | 0.013159151 |
| CA13         | 793.5495   | 1767.80542 | 1.160423 | 0.048431173 |
| HIST1H4B     | 1237.90027 | 2629.9104  | 1.086505 | 0.044955108 |
| TMEM238      | 540.426636 | 1292.61243 | 1.26186  | 0.049051218 |
| MAP3K12      | 1164.91956 | 2640.80933 | 1.180618 | 0.032695729 |



|                   |            |            |          |             |
|-------------------|------------|------------|----------|-------------|
| SUPT6H            | 1536.28967 | 3278.39624 | 1.086708 | 0.038741149 |
| SETD8             | 1534.44214 | 3245.69946 | 1.074111 | 0.040847965 |
| KPNA4             | 1770.0127  | 4346.49072 | 1.284198 | 0.015121312 |
| HSPA13            | 1113.1864  | 2404.30249 | 1.11386  | 0.043663781 |
| SYNGAP1           | 413.865173 | 1397.24207 | 1.75896  | 0.011786455 |
| DNASE1            | 88.685394  | 6040.18359 | 5.914078 | 5.08075E-06 |
| SMARCE1           | 7169.65967 | 17978.8652 | 1.273971 | 0.008584241 |
| SERF1A SERF<br>1B | 2637.46655 | 5479.979   | 1.025762 | 0.037452627 |
| VAMP5             | 5606.57959 | 12430.2227 | 1.091138 | 0.021486614 |
| C8orf82           | 4554.36475 | 13725.0146 | 1.543759 | 0.002820645 |
| LAMTOR3           | 1873.479   | 3788.46582 | 1.004004 | 0.048609525 |
| TPTE2P5           | 1157.52917 | 2639.71948 | 1.189278 | 0.031249555 |
| KIF5B             | 14385.5098 | 34050.418  | 1.137092 | 0.014629298 |
| SFPQ              | 10487.0479 | 23999.4297 | 1.11444  | 0.016995633 |
| TIMM10            | 1634.21313 | 4086.00659 | 1.312105 | 0.014184214 |
| GTF3C6            | 1353.3761  | 2910.0127  | 1.100258 | 0.039900973 |
| TTC32             | 1822.66956 | 3893.0957  | 1.083428 | 0.035342142 |
| RPS26             | 13978.1113 | 37395.2969 | 1.301455 | 0.006686572 |
| C9orf135          | 396.312866 | 1174.90405 | 1.574809 | 0.024314327 |
| IPO7              | 3044.86523 | 6859.78271 | 1.133199 | 0.021795092 |
| COX20             | 3781.13867 | 9216.12988 | 1.238502 | 0.012309486 |
| AIMP1             | 873.920654 | 2016.3009  | 1.209779 | 0.036756191 |
| HMGCS1            | 1869.78369 | 6083.7793  | 1.679187 | 0.00256368  |
| LRRC61            | 2158.93506 | 5995.49805 | 1.447089 | 0.006396802 |
| G3BP1             | 1724.74622 | 4227.69238 | 1.282571 | 0.015509374 |
| EEF1A1            | 4853.67773 | 10369.2363 | 1.041301 | 0.028107163 |
| AK4               | 3165.88379 | 6989.47998 | 1.102954 | 0.024574174 |
| ARGLU1            | 6850.94678 | 15613.7988 | 1.132244 | 0.016911503 |
| HPGD              | 269.751404 | 783.632629 | 1.55092  | 0.045729429 |
| ACBD5             | 3606.53931 | 8016.15869 | 1.108329 | 0.022786798 |
| C7orf55           | 4132.18506 | 8806.33008 | 1.044527 | 0.029064504 |
| PPP1CB            | 3218.54077 | 6710.46729 | 1.021466 | 0.035169352 |
| SLC2A5            | 5784.87451 | 12131.5918 | 1.009103 | 0.03115443  |
| C9orf47           | 9264.85254 | 20621.8535 | 1.08844  | 0.019615937 |
| STYX              | 5885.56934 | 13693.4082 | 1.162408 | 0.015217882 |
| TRMT2B            | 2004.65942 | 4951.38135 | 1.286057 | 0.013780399 |
| PWWP2A            | 3189.90283 | 7603.08936 | 1.21141  | 0.014967279 |
| NA                | 1219.42419 | 3299.10425 | 1.431241 | 0.010863111 |
| PTCHD4            | 1786.64111 | 4390.08643 | 1.284729 | 0.014985512 |
| ZFX               | 460.979279 | 1143.29712 | 1.314269 | 0.048924778 |
| ESCO2             | 376.912933 | 1205.42102 | 1.685884 | 0.017786564 |
| DNAJA2            | 7089.28857 | 15854.665  | 1.104846 | 0.019094307 |
| CHDH              | 4564.52637 | 11600.8145 | 1.292299 | 0.00894676  |

|                   |            |            |          |             |
|-------------------|------------|------------|----------|-------------|
| GATM              | 775.073364 | 2189.59375 | 1.497228 | 0.013361247 |
| CYP20A1           | 2456.40063 | 5208.5957  | 1.058669 | 0.033529937 |
| SLC12A2           | 2323.37256 | 4778.08838 | 1.018787 | 0.040934082 |
| CTNS              | 614.331116 | 2003.22217 | 1.703706 | 0.007973934 |
| RECQL             | 2107.2019  | 5089.79736 | 1.251607 | 0.015551018 |
| LOX               | 2965.41797 | 6679.95068 | 1.134153 | 0.021956127 |
| ZSCAN29           | 1511.34692 | 3138.89014 | 1.048252 | 0.045884606 |
| ACLY              | 10713.3809 | 22858.3125 | 1.01685  | 0.026887206 |
| RAPGEF5           | 1725.66992 | 4281.09717 | 1.299758 | 0.014381744 |
| USP9X             | 678.07373  | 1647.91724 | 1.283799 | 0.035572872 |
| NUP50             | 3181.58862 | 6570.96143 | 1.008607 | 0.037396487 |
| ZMYND11           | 10253.3252 | 22467.041  | 1.05736  | 0.022354502 |
| ZC3H4             | 4033.33789 | 8760.55469 | 1.072306 | 0.02581455  |
| ZBTB2             | 2315.98218 | 5243.47217 | 1.154655 | 0.022635674 |
| PYROXD1           | 2411.13428 | 5111.59521 | 1.05949  | 0.033701509 |
| ERI2              | 1212.03369 | 2620.10132 | 1.111891 | 0.041235462 |
| TIMM10B           | 1788.48877 | 4194.99561 | 1.218155 | 0.020029124 |
| ROCK1 ROCK1<br>P1 | 5324.81885 | 11295.6445 | 1.026782 | 0.029305985 |
| SDPR              | 1743.22229 | 5046.20166 | 1.518337 | 0.005465119 |
| SOS2              | 1563.08008 | 4020.61304 | 1.353658 | 0.012245144 |
| DSC2              | 2286.42041 | 5167.17969 | 1.15286  | 0.022977863 |
| C5orf24           | 4774.23047 | 11503.8145 | 1.2137   | 0.012709337 |
| HCCS              | 994.015442 | 2221.20068 | 1.163478 | 0.039326739 |
| ZBTB1             | 1111.33887 | 2913.28247 | 1.388066 | 0.014231594 |
| HNMT              | 1932.60254 | 3946.50024 | 1.016797 | 0.045316577 |
| SREK1IP1          | 1888.25989 | 4053.30981 | 1.089151 | 0.0337836   |
| UTP15             | 1409.72827 | 3224.99146 | 1.188082 | 0.026924627 |
| ARID1B            | 6988.59375 | 16641.5664 | 1.197218 | 0.012399352 |
| RYK               | 5496.64697 | 14028.0049 | 1.298807 | 0.008184554 |
| DCK               | 4349.27979 | 10371.416  | 1.203333 | 0.013759548 |
| RAPH1             | 239.265808 | 3969.38818 | 4.041616 | 0.000140188 |
| AP1G1             | 2261.47754 | 4939.39209 | 1.105358 | 0.028490273 |
| SLC25A32          | 2213.4397  | 5175.89893 | 1.202947 | 0.018741934 |
| QTRTD1            | 1608.34656 | 3385.20581 | 1.066011 | 0.04101146  |
| DLX2              | 2974.65601 | 10465.1465 | 1.76862  | 0.001277351 |
| RRM2              | 12785.4775 | 32185.6113 | 1.228823 | 0.009569701 |
| EIF2S1            | 2203.27783 | 4628.77295 | 1.052028 | 0.036426552 |
| SNX13             | 1574.16577 | 3268.58716 | 1.047043 | 0.044948943 |
| CPSF6             | 1226.81458 | 3061.50781 | 1.315498 | 0.017643163 |
| BRAP              | 659.597595 | 1638.10828 | 1.31494  | 0.03261552  |
| C9orf64           | 2567.25732 | 6160.07178 | 1.23056  | 0.015248463 |
| TMEM57            | 1382.93787 | 2929.63086 | 1.078487 | 0.042962212 |
| DDX5              | 2259.62988 | 5111.59521 | 1.154929 | 0.022915723 |

|                        |            |            |          |             |
|------------------------|------------|------------|----------|-------------|
| ZNF367                 | 1120.5769  | 2502.39282 | 1.160821 | 0.036010664 |
| CHORDC1 LOC<br>727896  | 1037.43433 | 2392.31372 | 1.207634 | 0.031840663 |
| TOP1P2 TOP1 <br>TOP1P1 | 8888.86328 | 20257.8301 | 1.124613 | 0.016648963 |
| TIMM8B                 | 22116.8438 | 54688.6211 | 1.134694 | 0.014203204 |
| SAA4                   | 3370.96875 | 8510.96973 | 1.291978 | 0.010094456 |
| NA                     | 3144.63623 | 6710.46729 | 1.055249 | 0.030540951 |
| ENTPD7                 | 1787.56494 | 4172.10791 | 1.211086 | 0.027827621 |
| NA                     | 3181.58862 | 7144.24463 | 1.126669 | 0.022030663 |
| TSNAXIP1               | 261.437164 | 804.340576 | 1.631754 | 0.037214931 |
| TMX1                   | 4836.12549 | 12538.1221 | 1.321786 | 0.007651076 |
| NA                     | 1939.99304 | 4768.2793  | 1.281095 | 0.014393281 |
| GP1BB SEPT5-<br>GP1BB  | 12095.3945 | 32383.9727 | 1.315148 | 0.006390967 |
| NA                     | 3091.05542 | 7033.07568 | 1.146516 | 0.020386582 |
| EME2                   | 651.283386 | 1639.19812 | 1.33412  | 0.030792639 |
| PTGES3                 | 2296.58228 | 62372.3633 | 4.616188 | 1.20486E-05 |
| CCDC69                 | 2991.28442 | 6258.16211 | 1.029463 | 0.034933392 |
| GMFB                   | 10911.999  | 28438.5625 | 1.287901 | 0.007396296 |
| GPR132                 | 223.561096 | 764.014587 | 1.769947 | 0.03068766  |
| MARCKS                 | 14745.7939 | 32850.4453 | 1.054799 | 0.021615306 |

“a” refers to the group treated with siCtr RNA.

“b” refers to the group treated with siPCNAP1.

“Upreg<sup>gene</sup>” refers to the genes upregulated by siPCNAP1.

**Table S5-2, related to Figure S3. List of genes regulated by PCNAP1**

| Gene_Symbol<br>Downreg <sup>gene</sup> | Normalized Intensity |                | log2 (Ratio) | P-value     |
|----------------------------------------|----------------------|----------------|--------------|-------------|
|                                        | C <sup>a</sup>       | T <sup>b</sup> | T/C          | T/C         |
| AMT                                    | 4934.04883           | 2394.49365     | -1.066497    | 0.03252282  |
| FUCA1                                  | 8589.5498            | 3472.39722     | -1.351593    | 0.007561329 |
| CXCL8                                  | 106923.18            | 15583.2812     | -2.977358    | 1.62331E-05 |
| EPCAM                                  | 57553.125            | 24422.3086     | -1.421372    | 0.003621404 |
| C4BPA                                  | 10523.0762           | 2114.39111     | -2.352709    | 0.000162848 |
| SERPINA6                               | 2765.87573           | 948.20636      | -1.550387    | 0.008067991 |
| BIRC5                                  | 6609.8335            | 1747.09753     | -1.944204    | 0.000866048 |
| CCT5                                   | 68366.2734           | 38412.168      | -1.08002     | 0.018059656 |
| VPS72                                  | 2748.32349           | 1313.32031     | -1.068671    | 0.045170069 |
| PPP4C                                  | 3932.64307           | 578.732849     | -2.781115    | 0.000153926 |
| PRKAG1                                 | 11700.0059           | 5727.38428     | -1.087415    | 0.021817017 |
| CASP6                                  | 15153.1934           | 5987.86865     | -1.389148    | 0.00523984  |
| HDAC2                                  | 10642.2471           | 5307.77588     | -1.059953    | 0.025266152 |
| TMEM98                                 | 7098.52686           | 1390.70264     | -2.37581     | 0.000206988 |
| FKBP10                                 | 2972.80835           | 1237.02783     | -1.268607    | 0.020558426 |
| CCNYL1                                 | 1609.27039           | 677.913086     | -1.245145    | 0.039123621 |
| CCNL1                                  | 9473.63281           | 4531.77246     | -1.113501    | 0.020617718 |
| TSSC1                                  | 19339.8828           | 8177.4624      | -1.303831    | 0.007258385 |
| NUP37                                  | 31113.793            | 16081.3623     | -1.051521    | 0.021883445 |
| PIH1D1                                 | 41636.8672           | 18088.9434     | -1.33337     | 0.005627913 |
| 7-Mar                                  | 3807.00537           | 1681.70398     | -1.188276    | 0.023213718 |
| MMADHC                                 | 42251.1992           | 16703.6914     | -1.47386     | 0.002935509 |
| FBXL5                                  | 3244.40723           | 946.026611     | -1.785819    | 0.003032244 |
| YIPF5                                  | 20180.5469           | 10216.6514     | -1.051093    | 0.023130145 |
| CYB5R4                                 | 1464.23279           | 459.934601     | -1.669875    | 0.012663457 |
| FBXO7                                  | 3128.00781           | 1399.42188     | -1.165875    | 0.028916517 |
| COPS4                                  | 1371.85217           | 298.630524     | -2.181904    | 0.003963116 |
| MPDU1                                  | 3233.32178           | 1261.00549     | -1.363263    | 0.013521042 |
| PCID2                                  | 13228.9043           | 6269.06104     | -1.132966    | 0.017244445 |
| RNF167                                 | 1870.70752           | 849.026184     | -1.13701     | 0.047901422 |
| PEX3                                   | 18923.2461           | 7174.76172     | -1.457063    | 0.003649298 |
| ATG4C                                  | 4610.7168            | 1908.40161     | -1.287611    | 0.013844527 |
| TM2D2                                  | 13886.6543           | 6161.16162     | -1.225862    | 0.011189442 |
| BLOC1S4                                | 2377.8772            | 818.509155     | -1.543337    | 0.00979046  |
| NDUFV1                                 | 14165.6445           | 2652.7981      | -2.452588    | 0.000102006 |
| RHBDD2                                 | 1924.28833           | 427.237823     | -2.172407    | 0.002166653 |
| SLC25A38                               | 4736.35449           | 1971.61536     | -1.281135    | 0.01396366  |
| OMA1                                   | 1869.78369           | 827.228333     | -1.17432     | 0.042476844 |
| FHL2                                   | 27333.5781           | 8532.76758     | -1.769628    | 0.000873471 |
| CYTH2                                  | 3371.89258           | 806.520386     | -2.075187    | 0.001175379 |
| STXBP3                                 | 542.274231           | 148.225372     | -1.931753    | 0.036068302 |

|             |            |            |           |             |
|-------------|------------|------------|-----------|-------------|
| NUP54       | 9067.1582  | 3441.88013 | -1.443195 | 0.005657944 |
| ANGPTL4     | 1501.18506 | 646.306213 | -1.213315 | 0.046175189 |
| LIPC        | 921.958557 | 311.709229 | -1.549461 | 0.033895224 |
| YIPF1       | 1509.49927 | 536.227051 | -1.491795 | 0.02010629  |
| ASGR1       | 47243.4492 | 23718.2383 | -1.158191 | 0.012729442 |
| TMEM128     | 6318.83447 | 2888.21484 | -1.165899 | 0.019182516 |
| AGTRAP      | 3225.93115 | 1605.4115  | -1.013941 | 0.049968537 |
| FAM210A     | 940.434692 | 178.742355 | -2.416887 | 0.005448379 |
| PARL        | 17819.2969 | 6236.36426 | -1.563434 | 0.002325449 |
| HAT1        | 28392.2598 | 12116.334  | -1.326268 | 0.006107373 |
| ZC3HC1      | 1353.3761  | 566.744019 | -1.253039 | 0.045658555 |
| ARHGAP5-AS1 | 2546.93359 | 1022.31903 | -1.319182 | 0.019655269 |
| PPTC7       | 1970.47864 | 891.531982 | -1.141982 | 0.045096863 |
| SH3BGRL     | 2577.41919 | 926.408508 | -1.480749 | 0.011056551 |
| PPAN        | 2314.13452 | 657.205139 | -1.822977 | 0.004171659 |
| DUSP11      | 6083.26367 | 1553.09668 | -1.990495 | 0.0007926   |
| TGOLN2      | 1208.3385  | 492.631348 | -1.291388 | 0.046327196 |
| ZCCHC9      | 5714.66504 | 2735.62988 | -1.094556 | 0.027066778 |
| KCTD14 NDUF | 2694.74268 | 549.305786 | -2.306682 | 0.000853185 |
| C2-KCTD14   |            |            |           |             |
| ENOPH1      | 3596.37744 | 1160.73535 | -1.636744 | 0.004526097 |
| EID2        | 8632.04492 | 4347.58057 | -1.037117 | 0.029641466 |
| MFSD5       | 831.425598 | 170.023209 | -2.322157 | 0.008331377 |
| MRPL45      | 1978.79285 | 599.440796 | -1.72601  | 0.006969413 |
| MAD2L2      | 2086.87817 | 903.520813 | -1.206852 | 0.034642894 |
| CTH         | 1345.06177 | 253.944931 | -2.396063 | 0.00262158  |
| ERI1        | 2874.88477 | 525.328125 | -2.465732 | 0.000517073 |
| RSF1        | 1192.63379 | 414.159119 | -1.519274 | 0.025488503 |
| BCKDK       | 1184.31958 | 322.608154 | -1.859933 | 0.011058006 |
| RBM48       | 822.1875   | 202.719986 | -2.032336 | 0.014549307 |
| APMAP       | 4998.71533 | 1737.28845 | -1.540481 | 0.004824144 |
| TPGS2       | 9901.35449 | 5008.05566 | -1.036686 | 0.028549729 |
| BET1        | 16807.7305 | 7464.67285 | -1.223651 | 0.010802291 |
| FARSA       | 3028.23657 | 1487.70312 | -1.031079 | 0.048679855 |
| ACTR6       | 2366.7915  | 622.328552 | -1.93505  | 0.002894385 |
| DERA        | 59883.8906 | 31858.6445 | -1.123921 | 0.014747894 |
| RAD51AP1    | 6535.92871 | 1875.70483 | -1.82637  | 0.001331242 |
| IFT52       | 6708.68066 | 2674.59595 | -1.362851 | 0.008133653 |
| LRIF1       | 1907.65979 | 850.116089 | -1.1639   | 0.043149259 |
| PRSS23      | 2993.13208 | 1043.02698 | -1.525837 | 0.008084187 |
| FOS         | 8949.83398 | 2728.00073 | -1.755907 | 0.001404194 |
| RASD1       | 7720.24854 | 23.977633  | NA        | NA          |
| TMEM37      | 12368.8408 | 3711.0835  | -1.782377 | 0.0010729   |
| ERGIC2      | 14492.6719 | 7477.75146 | -1.012283 | 0.029378556 |

|         |            |            |           |             |
|---------|------------|------------|-----------|-------------|
| RIOK2   | 5947.46436 | 2759.60742 | -1.141064 | 0.021893261 |
| GMPPA   | 794.473328 | 277.922546 | -1.503391 | 0.046180714 |
| TMCO3   | 976.463135 | 353.125122 | -1.455998 | 0.039163787 |
| ZNF395  | 1879.02185 | 839.217163 | -1.160525 | 0.044208948 |
| SMIM3   | 8788.16797 | 3258.77832 | -1.475819 | 0.004410054 |
| COPS2   | 5949.31201 | 1464.81543 | -2.04153  | 0.000681757 |
| GTF2H3  | 2177.41113 | 762.924683 | -1.516661 | 0.011843391 |
| FN3KRP  | 7955.81885 | 3409.18335 | -1.266037 | 0.011314258 |
| WRAP73  | 2755.71387 | 1053.9259  | -1.390448 | 0.014166337 |
| TBC1D19 | 787.082886 | 138.416336 | -2.575554 | 0.006231106 |
| PITHD1  | 5757.16016 | 1613.04077 | -1.855022 | 0.001331495 |
| METTL18 | 1156.60535 | 289.911377 | -1.975611 | 0.008719206 |
| RFC4    | 19645.6621 | 7260.86328 | -1.497234 | 0.003025203 |
| CCNDBP1 | 4782.54443 | 1473.53455 | -1.711257 | 0.002633653 |
| DKK1    | 31843.5996 | 7746.95508 | -2.146014 | 0.000201772 |
| ZNF277  | 44332.5352 | 15970.1934 | -1.614776 | 0.002583478 |
| CHD6    | 2629.15234 | 1162.91516 | -1.177783 | 0.031707715 |
| MTERF3  | 7720.24854 | 3709.99365 | -1.101162 | 0.023304883 |
| GLMN    | 1760.77466 | 232.147079 | -2.924133 | 0.000545329 |
| SRP54   | 28328.5176 | 13898.3076 | -1.120233 | 0.016014714 |
| TSPAN31 | 2170.94458 | 526.41803  | -2.050464 | 0.002415077 |
| MAT2B   | 4510.9458  | 622.328552 | -2.876157 | 0.000103338 |
| TTF1    | 1647.14648 | 633.227478 | -1.377707 | 0.025414398 |
| OXSM    | 1273.92871 | 503.530273 | -1.336471 | 0.038512472 |
| ZNF622  | 11518.9395 | 5608.58643 | -1.095017 | 0.021171818 |
| PIGU    | 4412.09814 | 1022.31903 | -2.119753 | 0.000725149 |
| CA9     | 10730.9326 | 4735.58252 | -1.233063 | 0.011668596 |
| HACL1   | 4590.39307 | 1552.00671 | -1.57647  | 0.00450371  |
| YIPF4   | 7141.9458  | 2522.01099 | -1.537679 | 0.003819347 |
| VAMP3   | 8253.28418 | 2856.60791 | -1.572493 | 0.003051233 |
| GAR1    | 2991.28442 | 1074.63391 | -1.481281 | 0.009470672 |
| WDR12   | 34729.5703 | 11599.7246 | -1.705571 | 0.001088719 |
| APEX1   | 85646.0703 | 25114.3906 | -1.98106  | 0.000320484 |
| VEGFA   | 939.510925 | 332.417175 | -1.48597  | 0.038345352 |
| OAZ2    | 3569.58716 | 1185.80298 | -1.595255 | 0.005363987 |
| PTPRN2  | 5008.87695 | 2394.49365 | -1.088683 | 0.029504338 |
| RHOG    | 540.426636 | 158.034393 | -1.823601 | 0.043459442 |
| ILF2    | 23573.6855 | 3203.19385 | -2.9367   | 2.38942E-05 |
| LRPAP1  | 5359.92334 | 1228.30872 | -2.140072 | 0.00056601  |
| NDUFA9  | 25279.957  | 13165.9004 | -1.02554  | 0.025268069 |
| ARL6IP1 | 12296.7842 | 4357.38965 | -1.544377 | 0.002853515 |
| PIAS1   | 2106.27808 | 948.20636  | -1.149864 | 0.041548491 |
| CPE     | 7377.51611 | 2490.40405 | -1.60288  | 0.002880483 |
| FGG     | 12377.1553 | 6289.76904 | -1.034512 | 0.027287168 |

|          |            |            |           |             |
|----------|------------|------------|-----------|-------------|
| SCP2     | 93767.25   | 34018.8125 | -1.707902 | 0.000967606 |
| PRSS8    | 749.206848 | 203.809875 | -1.891907 | 0.022462901 |
| PMM1     | 2621.76196 | 1193.43213 | -1.136527 | 0.036610954 |
| LMAN2    | 52217.2227 | 12829.123  | -2.189349 | 0.000158571 |
| PNRC1    | 6055.5498  | 2663.69702 | -1.217654 | 0.01575307  |
| AMBP     | 110503.852 | 56254.7969 | -1.280261 | 0.006777674 |
| ALDH1A1  | 51024.5859 | 19403.3535 | -1.550218 | 0.002035448 |
| IGF2R    | 3237.01685 | 1375.44421 | -1.240455 | 0.021335157 |
| LITAF    | 18825.3223 | 4086.00659 | -2.246051 | 0.000168848 |
| F2       | 5353.45703 | 1700.23218 | -1.672431 | 0.002761738 |
| FBXO8    | 3433.7876  | 1540.01794 | -1.164337 | 0.027259572 |
| RHOA     | 55048.6875 | 24003.7891 | -1.376634 | 0.004476127 |
| SERPINI1 | 5496.64697 | 1334.02832 | -2.058895 | 0.000694539 |
| QPCT     | 39032.6602 | 8566.55371 | -2.320858 | 0.000107721 |
| CCNG1    | 9916.13574 | 2501.30298 | -2.028271 | 0.000483499 |
| PSMC5    | 35227.5    | 18874.7559 | -1.013152 | 0.025898507 |
| POLR2C   | 6166.40625 | 2383.59473 | -1.401579 | 0.007269685 |
| MREG     | 892.39679  | 280.102356 | -1.656895 | 0.027766809 |
| SMNDC1   | 5630.59863 | 2554.70776 | -1.169514 | 0.019967441 |
| GADD45A  | 46005.5469 | 15582.1914 | -1.707952 | 0.001033843 |
| AUH      | 6164.55859 | 2565.60669 | -1.297033 | 0.011204004 |
| PHLDA1   | 47903.9688 | 15602.8994 | -1.768076 | 0.00079853  |
| PRIM1    | 10814.0752 | 4066.38843 | -1.461698 | 0.004273465 |
| VRK2     | 1406.95679 | 525.328125 | -1.419355 | 0.027067836 |
| PPP1R11  | 2885.04663 | 894.801636 | -1.696511 | 0.004686977 |
| CRYZ     | 65508.0195 | 10961.0479 | -2.767364 | 2.79278E-05 |
| MCL1     | 17604.9746 | 4421.69336 | -2.031068 | 0.000362444 |
| SNRPD1   | 8732.74023 | 4476.18799 | -1.012322 | 0.032898556 |
| CLP1     | 8471.30273 | 3645.68994 | -1.261667 | 0.011216391 |
| PAX6     | 16093.6279 | 6430.36523 | -1.373384 | 0.005531385 |
| PGRMC1   | 30472.6719 | 15680.2822 | -1.056247 | 0.021449061 |
| 15-Sep   | 143390.422 | 53685.918  | -1.736473 | 0.00083721  |
| DUSP14   | 6309.59619 | 1616.31042 | -1.987175 | 0.000776418 |
| EXOSC9   | 3334.94043 | 1055.01587 | -1.666381 | 0.004412128 |
| TCEAL1   | 9990.04004 | 3958.48926 | -1.384517 | 0.006155846 |
| CPVL     | 8887.93945 | 2631.00024 | -1.797    | 0.001203936 |
| TRUB2    | 4130.3374  | 1918.21057 | -1.1192   | 0.028932897 |
| STXBP6   | 16608.1875 | 5976.96973 | -1.520943 | 0.002853655 |
| PHACTR2  | 3490.13989 | 1356.91602 | -1.36938  | 0.012388689 |
| TTC5     | 3453.1875  | 1538.9281  | -1.173544 | 0.026220217 |
| FNDC3A   | 2945.09424 | 1432.11865 | -1.045153 | 0.047040146 |
| CCDC115  | 4693.85938 | 2037.00891 | -1.221689 | 0.017831635 |
| KIAA1324 | 1226.81458 | 504.620178 | -1.278601 | 0.048096485 |
| TMEM45A  | 6137.76855 | 1259.91565 | -2.303406 | 0.000292983 |

|          |            |            |           |             |
|----------|------------|------------|-----------|-------------|
| ENC1     | 15641.8867 | 7217.26758 | -1.170313 | 0.014004644 |
| GMD5     | 5948.38818 | 2101.3125  | -1.526848 | 0.004484135 |
| ATP6V0D1 | 2486.88623 | 861.015015 | -1.535217 | 0.009559072 |
| CRYL1    | 7106.84082 | 3118.18213 | -1.229043 | 0.013912309 |
| HOXA10   | 4700.32568 | 1238.1178  | -1.935118 | 0.001222553 |
| DDIT4    | 6319.7583  | 2879.49561 | -1.170392 | 0.018820738 |
| LAPTM4A  | 70382.9453 | 22155.332  | -1.86198  | 0.000570061 |
| HDAC8    | 1635.13696 | 556.934998 | -1.553037 | 0.015145057 |
| ALDH18A1 | 3560.34912 | 1496.42224 | -1.258121 | 0.018585118 |
| MPZL2    | 6084.1875  | 2425.0105  | -1.357424 | 0.00878668  |
| TRIP4    | 3462.42554 | 687.722107 | -2.345996 | 0.000522292 |
| DNASE2   | 1598.18469 | 267.023621 | -2.570096 | 0.001282199 |
| FUBP1    | 2501.66724 | 792.351746 | -1.665469 | 0.006168399 |
| GPC3     | 5822.75049 | 2435.90942 | -1.286343 | 0.01208464  |
| NOP58    | 79877.8281 | 43970.6172 | -1.131777 | 0.013994608 |
| FER      | 4112.78516 | 1712.22095 | -1.274862 | 0.015720313 |
| UGT2A3   | 42315.8672 | 19220.252  | -1.275047 | 0.007388491 |
| TAF2     | 2051.77344 | 935.127686 | -1.131619 | 0.045136459 |
| RAB3B    | 3128.93164 | 1367.81494 | -1.199037 | 0.025544776 |
| RND1     | 1462.38525 | 308.439545 | -2.229345 | 0.003146535 |
| DIMT1    | 1960.31677 | 708.430054 | -1.470237 | 0.015585485 |
| GALK2    | 929.348999 | 321.51825  | -1.517311 | 0.036138788 |
| SH3GLB1  | 4863.83936 | 2104.58228 | -1.227952 | 0.017020633 |
| RFC2     | 16773.5488 | 6516.4668  | -1.412932 | 0.004583573 |
| CHEK2    | 5595.49414 | 2187.41406 | -1.37989  | 0.008429658 |
| SERINC1  | 1977.86902 | 764.014587 | -1.37322  | 0.021041736 |
| TANK     | 12149.8994 | 3169.40698 | -1.983005 | 0.000507001 |
| OXA1L    | 13208.5811 | 3795.00537 | -1.842954 | 0.000823007 |
| GBAS     | 6544.24316 | 2078.4248  | -1.683054 | 0.002276583 |
| PAF1     | 668.835693 | 201.630096 | -1.74638  | 0.03581417  |
| TOM1L1   | 8579.3877  | 2739.9895  | -1.688013 | 0.001877004 |
| UBXN8    | 6400.12939 | 2976.49609 | -1.141661 | 0.021125957 |
| RTN4IP1  | 7719.32471 | 3234.80054 | -1.29714  | 0.010017638 |
| STX6     | 513.63623  | 146.045578 | -1.877663 | 0.042965718 |
| CDC37    | 3072.57935 | 1238.1178  | -1.315352 | 0.016849572 |
| TUBAL3   | 2150.62085 | 913.329834 | -1.235309 | 0.030587889 |
| SRSF5    | 45381.9805 | 23385.8203 | -1.115718 | 0.02444672  |
| FAT1     | 3181.58862 | 1130.21838 | -1.497226 | 0.008420971 |
| PDGFRL   | 749.206848 | 257.2146   | -1.537749 | 0.046362665 |
| DUSP1    | 31645.9043 | 13562.6211 | -1.329453 | 0.005924436 |
| CSTF1    | 13011.8105 | 4302.89502 | -1.642049 | 0.001852287 |
| UQCRC2   | 25597.7461 | 3827.70215 | -2.807148 | 3.12175E-05 |
| TACO1    | 4483.23145 | 1530.20886 | -1.56192  | 0.004855081 |
| MGAT4A   | 1653.61304 | 709.519958 | -1.21862  | 0.041344583 |



|                            |            |            |           |             |
|----------------------------|------------|------------|-----------|-------------|
| CTNNBL1                    | 2974.65601 | 1088.80249 | -1.454019 | 0.010498778 |
| DEPDC7                     | 2341.84863 | 863.194763 | -1.443148 | 0.013921201 |
| GRN                        | 1454.07092 | 482.822327 | -1.589414 | 0.016040653 |
| PEX2                       | 2828.69458 | 923.138855 | -1.622229 | 0.006156132 |
| IFNGR1                     | 67406.4453 | 21592.9473 | -1.831912 | 0.000590781 |
| MED4                       | 4756.67822 | 2219.021   | -1.120205 | 0.026655007 |
| TMEM9                      | 7757.20068 | 3364.4978  | -1.248024 | 0.012342281 |
| ARL4D                      | 2067.47827 | 419.608582 | -2.303264 | 0.001363221 |
| ATP6AP2                    | 7053.26025 | 3614.08325 | -1.006783 | 0.036025278 |
| PMPCB                      | 14150.8633 | 6463.06201 | -1.184906 | 0.013407693 |
| EIF3I                      | 56196.0547 | 13693.4082 | -2.205868 | 0.00014832  |
| CNN3                       | 13038.6006 | 4088.18628 | -1.718201 | 0.001354896 |
| SLC38A5                    | 1019.88202 | 364.024048 | -1.475216 | 0.035275184 |
| WRB                        | 8915.65332 | 3333.98071 | -1.464187 | 0.004599951 |
| BPGM                       | 2955.2561  | 794.531555 | -1.905286 | 0.002318768 |
| SCAMP3                     | 2441.61987 | 871.91394  | -1.489806 | 0.011366005 |
| HMOX1                      | 13001.6484 | 4712.69482 | -1.511319 | 0.003352619 |
| AGPAT2                     | 4809.33496 | 1227.21887 | -1.98158  | 0.001023135 |
| PSMC4                      | 5105.87695 | 2500.21313 | -1.055831 | 0.033420473 |
| RAB1A                      | 101081.023 | 47898.5898 | -1.365288 | 0.004543283 |
| HMGNA4                     | 1889.18372 | 406.529846 | -2.215103 | 0.001991899 |
| RMND1                      | 15143.0312 | 5079.98828 | -1.62028  | 0.001919347 |
| ANKRA2                     | 9185.40527 | 4564.46924 | -1.058123 | 0.026546303 |
| PEF1                       | 2232.8396  | 870.824036 | -1.360178 | 0.019356679 |
| TNF                        | 1762.62219 | 656.115234 | -1.425024 | 0.020315474 |
| SERPINH1                   | 6164.55859 | 2391.22388 | -1.396617 | 0.007420558 |
| CD68                       | 1579.70862 | 598.350891 | -1.399046 | 0.024998525 |
| HES1                       | 2458.24829 | 999.431335 | -1.300173 | 0.021817155 |
| NARF                       | 11320.3213 | 4088.18628 | -1.519028 | 0.003283266 |
| NSMCE4A                    | 20541.7539 | 8728.94824 | -1.302511 | 0.007212088 |
| COPG2                      | 911.796692 | 342.226196 | -1.402523 | 0.04865795  |
| NRAS                       | 2204.20166 | 709.519958 | -1.640457 | 0.007840305 |
| NAAA                       | 577.378845 | 170.023209 | -1.800817 | 0.040719368 |
| DSN1                       | 1058.68188 | 256.124725 | -2.036222 | 0.008963224 |
| RNF146                     | 1328.43335 | 547.125977 | -1.277048 | 0.043463703 |
| TMA16                      | 2195.88721 | 816.329407 | -1.430141 | 0.015605955 |
| FBXO5                      | 2051.77344 | 750.935852 | -1.452421 | 0.015626049 |
| SERINC3                    | 13319.4375 | 6127.375   | -1.174844 | 0.014243685 |
| HNRNPH2 RPL<br>36A-HNRNPH2 | 1544.604   | 643.036499 | -1.262077 | 0.038744949 |
| GLOD4                      | 9799.73633 | 3470.21729 | -1.544848 | 0.003788145 |
| MSRB1                      | 2722.45679 | 1290.43262 | -1.079983 | 0.043645632 |
| LMCD1                      | 2623.60962 | 1099.70142 | -1.256096 | 0.023881512 |
| EIF2B3                     | 5127.12451 | 1583.61365 | -1.710572 | 0.002483842 |

|                          |            |            |           |             |
|--------------------------|------------|------------|-----------|-------------|
| C8orf4                   | 14666.3467 | 3268.58716 | -2.204211 | 0.000215391 |
| DDX47                    | 13786.8838 | 3386.29565 | -2.066424 | 0.000354163 |
| TOMM22                   | 5703.57959 | 2726.91064 | -1.09621  | 0.026905384 |
| SLC35B3                  | 5722.97949 | 2447.89819 | -1.253922 | 0.013952233 |
| SCOC                     | 28689.7246 | 9787.2334  | -1.649575 | 0.001431289 |
| MED21                    | 8390.00781 | 1077.90356 | -2.986752 | 4.0268E-05  |
| ZNF556                   | 2584.80981 | 481.732422 | -2.435567 | 0.000665992 |
| TRAPPC3                  | 9248.22363 | 4336.68164 | -1.141332 | 0.018381352 |
| OPA3                     | 812.949463 | 265.933746 | -1.603208 | 0.035890464 |
| RDH14 NT5C1<br>B-RDH14   | 5766.39844 | 1581.43384 | -1.88574  | 0.001192689 |
| TM2D3                    | 10633.0088 | 4485.99707 | -1.296513 | 0.008837934 |
| NUBPL                    | 5141.90527 | 2457.70728 | -1.090454 | 0.028925354 |
| PPM1K                    | 1338.59521 | 514.429199 | -1.377375 | 0.032388009 |
| C11orf49                 | 1628.67029 | 481.732422 | -1.7574   | 0.008588346 |
| SLC36A4                  | 2394.50562 | 580.912659 | -2.051925 | 0.002036189 |
| SIL1                     | 1399.56641 | 406.529846 | -1.777787 | 0.010172688 |
| NAA35                    | 3867.97656 | 1746.00757 | -1.157616 | 0.025888104 |
| RBM3                     | 21809.2168 | 8619.95898 | -1.411541 | 0.004332881 |
| HABP4                    | 5749.76953 | 2814.10205 | -1.063571 | 0.030699445 |
| PROSC                    | 6227.37744 | 881.722961 | -2.844054 | 7.3511E-05  |
| PLEKHB2                  | 22252.6426 | 8165.47363 | -1.519413 | 0.002662775 |
| TMEM243                  | 12159.1367 | 4593.89648 | -1.45293  | 0.004245258 |
| YIPF2                    | 4057.35669 | 1950.90735 | -1.069362 | 0.037571095 |
| IP6K2                    | 9565.08887 | 2456.61743 | -2.001174 | 0.000543758 |
| ADD3                     | 15433.1064 | 5920.29541 | -1.430965 | 0.004328927 |
| AHSG                     | 8381.69336 | 2403.21265 | -1.839532 | 0.00106352  |
| GJB1                     | 14475.1191 | 1938.91858 | -2.926549 | 3.06588E-05 |
| CAPZB                    | 69724.2734 | 23980.9023 | -1.740115 | 0.00086251  |
| WIBG                     | 7177.97412 | 3514.90283 | -1.072184 | 0.027102033 |
| CDK1                     | 21310.3613 | 5586.78857 | -1.990943 | 0.000392918 |
| FIP1L1                   | 3696.14868 | 643.036499 | -2.538306 | 0.000292393 |
| ZHX1-C8orf76 <br>C8orf76 | 4899.86816 | 2480.59497 | -1.006272 | 0.041622747 |
| ADIPOR2                  | 4304.93701 | 1821.21021 | -1.252845 | 0.016627457 |
| AMN1                     | 2586.65723 | 1044.11694 | -1.311088 | 0.019904215 |
| MRPL10                   | 7685.14355 | 2296.40332 | -1.777235 | 0.001422715 |
| RALB                     | 2377.8772  | 839.217163 | -1.506798 | 0.01105536  |
| DHRS1                    | 4500.78369 | 577.642944 | -2.980764 | 0.046516683 |
| TOP1MT                   | 1562.15625 | 329.147491 | -2.233955 | 0.002731875 |
| AS3MT C10orf<br>32-ASMT  | 4438.88867 | 1571.62488 | -1.509003 | 0.005985338 |
| TM4SF1                   | 20360.6875 | 5597.6875  | -1.918818 | 0.000522941 |
| BPHL                     | 5803.35059 | 2672.41602 | -1.150329 | 0.021307958 |

|             |            |            |           |             |
|-------------|------------|------------|-----------|-------------|
| LIN52       | 2349.23926 | 924.22876  | -1.34787  | 0.019182295 |
| C2orf15     | 2386.19141 | 754.205505 | -1.668125 | 0.006488077 |
| SPTSSA      | 36385.0312 | 19643.1309 | -1.009286 | 0.026299752 |
| WDR66       | 4148.81348 | 1355.82617 | -1.621948 | 0.004157097 |
| UFM1        | 523.798096 | 137.326447 | -2.004999 | 0.034034878 |
| UFSP2       | 1328.43335 | 501.350494 | -1.403608 | 0.030355221 |
| CCT4        | 55401.582  | 28871.25   | -1.134673 | 0.014078243 |
| NOP56       | 7168.73584 | 2403.21265 | -1.611405 | 0.002834332 |
| CMTM6       | 6012.13086 | 1313.32031 | -2.213438 | 0.000391066 |
| TCEAL8      | 4619.95459 | 2337.81909 | -1.003435 | 0.043232877 |
| CAT         | 3136.32202 | 862.104858 | -1.872396 | 0.002382847 |
| PAIP2       | 17749.0879 | 6872.86133 | -1.420259 | 0.0043712   |
| CDK8        | 1445.75671 | 624.508362 | -1.208364 | 0.048646279 |
| EFNA1       | 1157.52917 | 428.327698 | -1.428638 | 0.0336693   |
| IGFBP1      | 64595.3008 | 29107.7559 | -1.359579 | 0.004788298 |
| ATP5B       | 155859.031 | 84933.1328 | -1.233951 | 0.008371862 |
| IER3IP1     | 5920.67383 | 3017.91211 | -1.007112 | 0.038341723 |
| SGCE        | 5522.51318 | 2616.83154 | -1.106953 | 0.026120611 |
| STX5        | 3885.52881 | 1366.7251  | -1.515128 | 0.00654768  |
| CXCR4       | 1672.08923 | 696.441223 | -1.261708 | 0.035773106 |
| RWDD2A      | 3452.26367 | 1606.50134 | -1.111581 | 0.033202421 |
| NR0B2       | 24748.7676 | 11523.4326 | -1.189892 | 0.011766219 |
| SCPEP1      | 1372.776   | 579.822754 | -1.240666 | 0.046617597 |
| ASB8        | 4167.28955 | 1130.21838 | -1.889714 | 0.001616751 |
| INTS12      | 1112.2627  | 343.316101 | -1.681387 | 0.018684603 |
| ARPC1B      | 106642.336 | 58626.4023 | -1.171589 | 0.011428859 |
| AFMID       | 1562.15625 | 417.428772 | -1.900272 | 0.006165421 |
| CLK1        | 7948.42822 | 2273.51562 | -1.840564 | 0.001097    |
| VCAN        | 1716.43188 | 720.418884 | -1.250696 | 0.036054011 |
| UBXN6       | 1969.55481 | 750.935852 | -1.392276 | 0.019871978 |
| OARD1       | 12025.1855 | 5901.76709 | -1.08372  | 0.022033373 |
| UTP18       | 9918.90723 | 3084.39551 | -1.731161 | 0.002117423 |
| DTD1        | 44276.1836 | 21779.3203 | -1.174892 | 0.01182046  |
| TMEM237     | 2097.96387 | 461.024475 | -2.19231  | 0.001744265 |
| AGT         | 14212.7578 | 5209.68555 | -1.495339 | 0.003346838 |
| CHEK1       | 6735.4707  | 2187.41406 | -1.6532   | 0.002504821 |
| UCHL5       | 4997.7915  | 2294.22339 | -1.145936 | 0.023392428 |
| TMEM161A    | 2847.17065 | 1228.30872 | -1.215945 | 0.025809584 |
| DARS        | 39594.332  | 13112.4951 | -1.729598 | 0.000963307 |
| SAE1        | 23870.2285 | 3611.90332 | -2.783866 | 3.38164E-05 |
| LTV1        | 6020.44482 | 1809.22131 | -1.756475 | 0.001836393 |
| DHRS7       | 34774.8359 | 18464.957  | -1.022864 | 0.031349748 |
| PICALM      | 2829.61841 | 970.004211 | -1.550284 | 0.007877951 |
| ASB3 GPR75- | 3406.99731 | 1581.43384 | -1.114921 | 0.033058077 |

|          |            |            |           |             |
|----------|------------|------------|-----------|-------------|
| ASB3     |            |            |           |             |
| PRKAA1   | 3064.26514 | 785.812439 | -1.974101 | 0.001787118 |
| MRPL19   | 44818.457  | 21002.2266 | -1.243126 | 0.008543731 |
| EIF3M    | 16382.7793 | 5899.5874  | -1.520075 | 0.002875917 |
| HEXB     | 10669.9619 | 2685.49487 | -2.034675 | 0.000452508 |
| STK17B   | 14548.0996 | 3514.90283 | -2.088825 | 0.000319482 |
| ALKBH1   | 3571.43481 | 1064.82483 | -1.752483 | 0.003043247 |
| HNRNPA0  | 4060.12817 | 473.013306 | -3.119697 | 7.64322E-05 |
| ZNF207   | 15052.498  | 5079.98828 | -1.611828 | 0.001993166 |
| HELZ     | 1798.65063 | 817.419312 | -1.134724 | 0.0498969   |
| ANKMY2   | 1889.18372 | 816.329407 | -1.208896 | 0.037594393 |
| ASCC1    | 4194.08008 | 814.149597 | -2.378741 | 0.000367434 |
| CDR2     | 867.454041 | 307.34964  | -1.482529 | 0.043035332 |
| HGD      | 11299.9971 | 4379.1875  | -1.41809  | 0.005073165 |
| ANKRD13A | 1896.5741  | 668.104004 | -1.506515 | 0.014436597 |
| LPAR6    | 8848.21582 | 2737.80957 | -1.734165 | 0.001538225 |
| MRPS30   | 3488.29224 | 1186.89282 | -1.560435 | 0.006131237 |
| LRMP     | 1019.88202 | 374.922974 | -1.433787 | 0.039423373 |
| ARPC5    | 6851.87061 | 1777.6145  | -1.9724   | 0.000762719 |
| CTSC     | 8851.91113 | 2210.30176 | -2.037571 | 0.000503811 |
| TCP11L2  | 755.673462 | 265.933746 | -1.499247 | 0.04995155  |
| ELP4     | 1464.23279 | 330.237396 | -2.135282 | 0.00388499  |
| METAP2   | 19446.1211 | 8177.4624  | -1.312167 | 0.006978564 |
| GPCPD1   | 1671.16541 | 547.125977 | -1.610434 | 0.012421705 |
| ANXA5    | 39024.3438 | 15678.1016 | -1.443175 | 0.00340978  |
| MRS2P2   | 1535.36584 | 566.744019 | -1.4363   | 0.023212778 |
| FAM114A1 | 3381.13062 | 1626.11938 | -1.063912 | 0.040294923 |
| SH3YL1   | 1092.86267 | 289.911377 | -1.893269 | 0.011644482 |
| DPYSL3   | 1796.8031  | 438.136749 | -2.036223 | 0.003411998 |
| COMMD10  | 3010.68433 | 1389.61279 | -1.120358 | 0.0351546   |
| TMEM177  | 1212.03369 | 286.641693 | -2.060483 | 0.006735293 |
| METTL14  | 2142.30664 | 515.519104 | -2.061239 | 0.002719681 |
| ERP27    | 14846.4893 | 3882.19678 | -1.975204 | 0.000475444 |
| PON2     | 30522.5566 | 13541.9131 | -1.275202 | 0.007666891 |
| CNOT7    | 4375.146   | 1918.21057 | -1.203059 | 0.020053811 |
| ECHDC2   | 2548.78125 | 1021.22919 | -1.321808 | 0.019422783 |
| LCOR     | 1330.28088 | 538.40686  | -1.302336 | 0.04037714  |
| SFXN4    | 6318.83447 | 2672.41602 | -1.275762 | 0.0121097   |
| CCT2     | 21780.5781 | 6527.36572 | -1.804538 | 0.000802179 |
| SLTM     | 6111.90186 | 2091.50342 | -1.573438 | 0.003660169 |
| SLC38A6  | 1310.88098 | 514.429199 | -1.346986 | 0.036192697 |
| WDR45B   | 640.197693 | 191.82106  | -1.759394 | 0.037404906 |
| DNAJC22  | 3696.14868 | 815.239502 | -2.192989 | 0.000726687 |
| SMIM14   | 26274.8965 | 8039.04639 | -1.794511 | 0.000796204 |

|              |            |            |           |             |
|--------------|------------|------------|-----------|-------------|
| TIMMDC1      | 3634.25366 | 1259.91565 | -1.534498 | 0.006478272 |
| TDP2         | 17105.1953 | 2651.70825 | -2.718935 | 6.60252E-05 |
| TMEM156      | 2050.84985 | 719.328979 | -1.514519 | 0.012801224 |
| PDIA6        | 4256.89893 | 762.924683 | -2.495397 | 0.000266163 |
| C7orf25      | 2069.32593 | 407.619751 | -2.345286 | 0.001232287 |
| SEC22B       | 1790.33643 | 494.811157 | -1.856675 | 0.005554139 |
| CPB2         | 2424.06738 | 449.035675 | -2.442083 | 0.00073491  |
| REV3L        | 1778.3269  | 674.643372 | -1.397731 | 0.021891488 |
| CLRN3        | 6716.0708  | 1918.21057 | -1.834743 | 0.001264393 |
| SPG21        | 1292.40491 | 502.440399 | -1.360525 | 0.0354033   |
| CCNE1        | 4385.30811 | 1831.01917 | -1.272292 | 0.015208643 |
| ACTR10       | 3398.68286 | 1044.11694 | -1.709101 | 0.003728544 |
| PLRG1        | 3344.17847 | 1270.81458 | -1.401186 | 0.011414046 |
| MAEA         | 503.474365 | 127.51741  | -2.067544 | 0.033369593 |
| DCP1B        | 495.160126 | 103.53978  | -2.387533 | 0.021812398 |
| PRKAA2       | 957.063232 | 232.147079 | -2.042213 | 0.010689063 |
| FEZ2         | 7882.83838 | 3958.48926 | -1.038795 | 0.030278618 |
| CHIC2        | 1091.93896 | 409.79953  | -1.406017 | 0.038914196 |
| TSPAN3       | 4789.93506 | 1625.02954 | -1.57331  | 0.004400332 |
| GLO1         | 57895.8594 | 16187.082  | -2.004694 | 0.000304614 |
| LRRRC75A-AS1 | 49188.9844 | 21833.8145 | -1.333039 | 0.005544299 |
| SUCLG1       | 10830.7041 | 4391.17627 | -1.353971 | 0.006818552 |
| DAP3         | 8952.60547 | 4271.28809 | -1.115667 | 0.02079436  |
| FAM118B      | 2830.54224 | 871.91394  | -1.706667 | 0.004635627 |
| SMPDL3A      | 5515.12305 | 1572.71472 | -1.827991 | 0.001521828 |
| WDFY2        | 1834.67908 | 568.923828 | -1.690489 | 0.008620525 |
| TRMT11       | 6555.32861 | 1888.78345 | -1.820908 | 0.001354925 |
| BAAT         | 6139.61572 | 1237.02783 | -2.330118 | 0.000271075 |
| ARF1         | 13688.0361 | 1193.43213 | -3.541999 | 1.0907E-05  |
| SC5D         | 7919.79053 | 3979.19702 | -1.038153 | 0.030316224 |
| SLC25A3      | 174927.328 | 77590.5312 | -1.534703 | 0.002026693 |
| C11orf80     | 593.083557 | 125.337624 | -2.330692 | 0.016464114 |
| DUSP6        | 12524.04   | 6355.1626  | -1.036541 | 0.026969342 |
| DEGS1        | 1516.88977 | 397.81073  | -1.925162 | 0.006078099 |
| STARD10      | 5778.40771 | 2523.10083 | -1.22532  | 0.015628804 |
| DDOST        | 127718.977 | 59770.7891 | -1.416882 | 0.003531011 |
| EVA1A        | 4716.95459 | 1195.61194 | -1.990379 | 0.001014368 |
| PRPF18       | 5069.84814 | 726.958252 | -2.823204 | 9.85207E-05 |
| RAB28        | 2910.91333 | 589.631775 | -2.316579 | 0.000750439 |
| DYNC2LI1     | 8923.04395 | 2628.82056 | -1.803926 | 0.001169937 |
| PAK1IP1      | 832.349365 | 233.236969 | -1.836415 | 0.02099807  |
| AATF         | 3625.01538 | 1205.42102 | -1.594152 | 0.005229418 |
| CMAS         | 9782.18359 | 2942.70947 | -1.778203 | 0.001224929 |
| CFI          | 47614.8203 | 18657.8672 | -1.497451 | 0.002601651 |

|          |            |            |           |             |
|----------|------------|------------|-----------|-------------|
| LAYN     | 1454.99475 | 362.934174 | -1.993505 | 0.005509923 |
| RPAP3    | 8363.21777 | 1853.90698 | -2.203454 | 0.000303308 |
| PTCD3    | 5541.91357 | 2142.72852 | -1.394908 | 0.007980024 |
| ASAH1    | 8825.12012 | 2933.99023 | -1.632194 | 0.002308898 |
| PDHX     | 10051.9355 | 3548.6897  | -1.549928 | 0.003033624 |
| CHRNB1   | 1092.86267 | 355.304932 | -1.607625 | 0.023023795 |
| MRPL42   | 24685.0254 | 12495.6162 | -1.066422 | 0.020950779 |
| TSEN2    | 2258.70605 | 1022.31903 | -1.14256  | 0.040256675 |
| DR1      | 2178.33496 | 527.507935 | -2.052466 | 0.002364336 |
| BAMBI    | 96488.7891 | 31037.9551 | -1.871407 | 0.00048885  |
| RMDN1    | 9820.05957 | 5039.6626  | -1.015774 | 0.031368133 |
| LRRC58   | 1861.46948 | 722.598633 | -1.365462 | 0.023058742 |
| ATP5SL   | 3182.51221 | 612.519531 | -2.391144 | 0.000527676 |
| CFLAR    | 2030.526   | 935.127686 | -1.11631  | 0.047899243 |
| MAP1LC3B | 11302.7686 | 2362.88672 | -2.298108 | 0.000183652 |
| SNRPD3   | 3300.75952 | 1508.41101 | -1.13659  | 0.031091046 |
| SOX4     | 48221.7578 | 25211.3906 | -1.106409 | 0.016260101 |
| TSPAN13  | 9702.73633 | 2933.99023 | -1.770549 | 0.001267481 |
| CCT7     | 22187.9766 | 2329.1001  | -3.297029 | 1.20762E-05 |
| THUMPD2  | 2315.05835 | 676.823181 | -1.780958 | 0.004738686 |
| MBIP     | 11310.1592 | 2735.62988 | -2.091801 | 0.000359503 |
| GMPR2    | 13191.0283 | 5273.98926 | -1.372876 | 0.005869939 |
| CCNI     | 10657.9521 | 5058.19043 | -1.130085 | 0.018489918 |
| DAZAP2   | 29854.6445 | 12991.5176 | -1.301852 | 0.006791025 |
| LETMD1   | 8753.06348 | 1239.20764 | -2.846831 | 5.21799E-05 |
| PMP22    | 1427.28052 | 224.517838 | -2.669672 | 0.001364412 |
| TMEM41A  | 3109.53174 | 892.621887 | -1.809048 | 0.002955428 |
| BAG1     | 5595.49414 | 2609.20239 | -1.130435 | 0.023552248 |
| RTFDC1   | 11608.5488 | 2910.0127  | -2.040963 | 0.000422283 |
| SERPINB1 | 24829.1387 | 11265.1279 | -1.227239 | 0.009880129 |
| BCAP31   | 11646.4248 | 2285.50439 | -2.38743  | 0.000137767 |
| ARSE     | 1734.90808 | 462.11438  | -1.909449 | 0.005055704 |
| MIOS     | 911.796692 | 321.51825  | -1.490179 | 0.039544147 |
| CCDC92   | 776.921021 | 232.147079 | -1.745481 | 0.030711182 |
| CD9      | 18347.7148 | 8277.73242 | -1.206309 | 0.01148798  |
| PPARG    | 5234.28564 | 913.329834 | -2.536485 | 0.000184739 |
| ITGA2    | 5796.88379 | 538.40686  | -3.455666 | 2.67952E-05 |
| ABI2     | 2234.68726 | 655.02533  | -1.776414 | 0.005046083 |
| RNASSET2 | 31989.5605 | 16199.0703 | -1.084155 | 0.018720115 |
| CAPNS1   | 9077.31934 | 3525.80176 | -1.410354 | 0.005735268 |
| RORA     | 2801.9043  | 1075.72375 | -1.384684 | 0.014231688 |
| RALY     | 8914.72949 | 4508.88477 | -1.032007 | 0.030018818 |
| TMEM9B   | 2114.59229 | 720.418884 | -1.557339 | 0.010772898 |
| ZFAND1   | 3380.20679 | 990.712158 | -1.777955 | 0.002968457 |

|          |            |            |           |             |
|----------|------------|------------|-----------|-------------|
| FYN      | 983.853577 | 373.833099 | -1.386698 | 0.046573877 |
| FH       | 39204.4883 | 11731.6016 | -1.878373 | 0.000525085 |
| TIA1     | 1915.974   | 764.014587 | -1.326462 | 0.025320206 |
| WARS2    | 2702.13306 | 1237.02783 | -1.129525 | 0.036710493 |
| SS18     | 4448.12695 | 1455.00635 | -1.622541 | 0.003894788 |
| HNRNPLL  | 12104.6328 | 4650.5708  | -1.429292 | 0.004712832 |
| SRSF3    | 68394.9141 | 31588.3516 | -1.33922  | 0.005248831 |
| PAWR     | 2703.05688 | 1290.43262 | -1.069466 | 0.045545451 |
| PEX13    | 2503.51489 | 535.137146 | -2.236285 | 0.001153616 |
| AGPS     | 811.101807 | 277.922546 | -1.532866 | 0.042061076 |
| NUPL2    | 10957.2656 | 3567.21777 | -1.668169 | 0.001791829 |
| PAAF1    | 11798.8525 | 3860.39893 | -1.65943  | 0.001794972 |
| KDELC1   | 994.015442 | 352.035248 | -1.48569  | 0.035558812 |
| IFNGR2   | 3227.77881 | 733.497559 | -2.150456 | 0.000988928 |
| IVD      | 2142.30664 | 707.340149 | -1.603027 | 0.009152011 |
| ID1      | 192796.5   | 72076.7656 | -1.778387 | 0.00069338  |
| WBSCR22  | 16474.2363 | 7259.77295 | -1.235095 | 0.010296316 |
| MYH7B    | 630.035828 | 124.247734 | -2.431612 | 0.012559077 |
| SLC44A1  | 2177.41113 | 979.813232 | -1.150758 | 0.040304586 |
| UGP2     | 24944.6152 | 4065.29858 | -2.681631 | 4.29628E-05 |
| NAE1     | 36167.0117 | 19554.8496 | -1.006032 | 0.026717307 |
| BUB3     | 8697.63574 | 3828.79199 | -1.230016 | 0.012740047 |
| AP1S1    | 6183.03467 | 3073.49658 | -1.044902 | 0.032209277 |
| KIAA1671 | 1643.45117 | 567.833923 | -1.532332 | 0.015990963 |
| SLC2A3   | 11717.5576 | 5176.98877 | -1.232132 | 0.011401123 |
| SEC22A   | 3261.95972 | 979.813232 | -1.742347 | 0.003490121 |
| MPP1     | 8509.17871 | 3485.47583 | -1.332494 | 0.008242451 |
| VRK1     | 3842.10986 | 1538.9281  | -1.32875  | 0.013395115 |
| NUCB2    | 11068.1221 | 4928.49316 | -1.221196 | 0.012180713 |
| COX7A2L  | 52571.0391 | 11254.2285 | -2.391933 | 0.000103492 |
| MIPOL1   | 2052.69727 | 589.631775 | -1.803834 | 0.005247567 |
| HSPA14   | 4998.71533 | 2026.10999 | -1.322029 | 0.011444537 |
| CSTF2    | 2603.28589 | 483.912231 | -2.439502 | 0.000651911 |
| ASRGL1   | 5777.48389 | 2879.49561 | -1.038159 | 0.041178282 |
| C6orf89  | 1770.0127  | 719.328979 | -1.297941 | 0.03011458  |
| AP2M1    | 3852.27173 | 1314.41028 | -1.558551 | 0.005618786 |
| C3orf52  | 1191.70996 | 451.215454 | -1.397804 | 0.03523989  |
| ACTL6A   | 19774.9961 | 4844.57178 | -2.078346 | 0.000293343 |
| CCNC     | 13771.1787 | 2717.10181 | -2.378899 | 0.000128478 |
| METTL25  | 622.645386 | 202.719986 | -1.63535  | 0.049284156 |
| CLU      | 5777.48389 | 772.733704 | -2.926483 | 6.89269E-05 |
| VBP1     | 13093.1055 | 5199.87646 | -1.382349 | 0.005641914 |
| ZCCHC11  | 3119.6936  | 1531.29883 | -1.032965 | 0.047481764 |
| CHCHD7   | 4710.48779 | 1344.92725 | -1.819735 | 0.001811699 |

|          |            |            |           |             |
|----------|------------|------------|-----------|-------------|
| TRIM13   | 2267.94409 | 675.733276 | -1.753055 | 0.005311588 |
| CLASP1   | 1799.57446 | 632.137573 | -1.509462 | 0.015265012 |
| POLG2    | 7079.12695 | 2436.99927 | -1.573296 | 0.00332625  |
| NECAP2   | 6571.95703 | 1961.80627 | -1.770977 | 0.001626514 |
| LPIN2    | 1807.88867 | 492.631348 | -1.877417 | 0.005162897 |
| LTF      | 2855.48486 | 1075.72375 | -1.412231 | 0.012681035 |
| WRAP53   | 469.293549 | 94.820641  | -2.459107 | 0.022169594 |
| KCNIP4   | 701.168884 | 188.551376 | -1.916034 | 0.024065627 |
| SORL1    | 1030.96765 | 343.316101 | -1.572849 | 0.027309228 |
| TALDO1   | 22142.7109 | 9948.53809 | -1.230219 | 0.009928885 |
| BRAP     | 2087.802   | 577.642944 | -1.858527 | 0.004361262 |
| PLTP     | 1744.14612 | 622.328552 | -1.486106 | 0.01704558  |
| LMBRD1   | 10976.665  | 3386.29565 | -1.74515  | 0.001313643 |
| TSPAN7   | 3289.67383 | 1088.80249 | -1.600407 | 0.005638419 |
| ALG8     | 5117.88623 | 1550.91687 | -1.737808 | 0.002250923 |
| DDX1     | 21095.1152 | 10216.6514 | -1.118541 | 0.016811326 |
| TSEN15   | 966.30127  | 299.720398 | -1.671385 | 0.023805127 |
| CDO1     | 876.692078 | 322.608154 | -1.429559 | 0.047984876 |
| RFC5     | 5775.63623 | 2890.39453 | -1.032339 | 0.034877345 |
| VRK3     | 396.312866 | 97.00042   | -2.17373  | 0.043136556 |
| PSMD11   | 10759.5703 | 2469.69604 | -2.165393 | 0.00028887  |
| KIAA0020 | 4222.71826 | 915.509583 | -2.217041 | 0.00057162  |
| C7orf49  | 891.472961 | 275.742767 | -1.679293 | 0.026448689 |
| KYNU     | 9059.76758 | 3028.81104 | -1.62497  | 0.002344271 |
| PHB2     | 23653.1328 | 5513.76562 | -2.168236 | 0.000202285 |
| TSG101   | 20001.3281 | 9421.03027 | -1.153133 | 0.01575906  |
| HMGCL    | 14138.8535 | 1637.01831 | -3.134824 | 2.03482E-05 |
| TBCE     | 966.30127  | 265.933746 | -1.849106 | 0.015886523 |
| MAPK8    | 1345.9856  | 525.328125 | -1.355004 | 0.034294717 |
| CYP20A1  | 1137.20544 | 406.529846 | -1.476258 | 0.030470094 |
| GPRC5C   | 1537.2135  | 503.530273 | -1.609351 | 0.013988061 |
| MLLT10   | 543.198059 | 148.225372 | -1.934199 | 0.035807595 |
| ASNS     | 72073.5078 | 40808.8398 | -1.078503 | 0.018145863 |
| TFG      | 28869.8672 | 9788.32324 | -1.659202 | 0.001371782 |
| JKAMP    | 15648.3535 | 5090.88721 | -1.66352  | 0.001583859 |
| NR2C2AP  | 3613.92993 | 913.329834 | -1.994121 | 0.001358616 |
| CHM      | 2520.14331 | 1020.13928 | -1.306752 | 0.020704467 |
| ANKRD1   | 920.110962 | 180.922134 | -2.366267 | 0.02041485  |
| SLC35A3  | 1436.51868 | 566.744019 | -1.339639 | 0.033297863 |
| UCK2     | 10037.1543 | 4940.48242 | -1.075739 | 0.023941267 |
| ASMTL    | 821.263733 | 233.236969 | -1.817335 | 0.022405466 |
| CERS5    | 1680.40344 | 566.744019 | -1.567413 | 0.014001186 |
| ABHD3    | 7017.23193 | 2811.92236 | -1.358029 | 0.008103882 |
| ENOSF1   | 1952.00244 | 611.429626 | -1.677279 | 0.008223278 |



|                     |            |            |           |             |
|---------------------|------------|------------|-----------|-------------|
| DFFA                | 31437.125  | 12280.9072 | -1.465626 | 0.003172627 |
| SYAP1               | 34531.875  | 13661.8008 | -1.455146 | 0.003281208 |
| NMD3                | 1454.99475 | 613.609436 | -1.243119 | 0.043594375 |
| CD40                | 3370.96875 | 1550.91687 | -1.12738  | 0.03174955  |
| ANKRD37             | 4330.80322 | 1930.19946 | -1.179309 | 0.02217688  |
| SAAL1               | 2920.15137 | 1022.31903 | -1.519265 | 0.008488071 |
| GNPDA2              | 1011.56775 | 192.91095  | -2.402777 | 0.00475369  |
| CRK                 | 594.931213 | 123.157837 | -2.36343  | 0.015613605 |
| ENO2                | 9907.82129 | 3805.9043  | -1.428712 | 0.005105278 |
| RRP8                | 649.43573  | 115.528595 | -2.592424 | 0.009388391 |
| KCTD18              | 1040.20581 | 374.922974 | -1.461864 | 0.035509441 |
| GPS1                | 4247.66064 | 1063.73499 | -2.006154 | 0.001080589 |
| MOGAT3              | 3823.63379 | 1335.11816 | -1.525301 | 0.006395776 |
| ART4                | 352.893951 | 75.202576  | -2.43203  | 0.03933163  |
| DCDC2               | 5993.65479 | 2631.00024 | -1.219985 | 0.015681528 |
| GDE1                | 9891.19336 | 4594.98633 | -1.156686 | 0.01680862  |
| PLEKHJ1             | 11210.3877 | 4227.69238 | -1.457253 | 0.004294397 |
| ISY1                | 6264.32959 | 1678.43433 | -1.922521 | 0.000976601 |
| ROBO1               | 11040.4082 | 4184.09668 | -1.450553 | 0.004446517 |
| AZI2                | 11671.3672 | 5857.08154 | -1.052355 | 0.025536964 |
| METTL17             | 8535.04492 | 1118.22961 | -2.958052 | 4.20855E-05 |
| TGM2                | 2828.69458 | 1293.70227 | -1.132155 | 0.035172537 |
| L2HGDH              | 1056.83423 | 343.316101 | -1.60811  | 0.024164466 |
| CCDC77              | 2024.98315 | 527.507935 | -1.94511  | 0.003573414 |
| IMP3                | 16103.7891 | 7746.95508 | -1.110417 | 0.018310158 |
| STRAP               | 24151.0645 | 11633.5117 | -1.138657 | 0.014999883 |
| PAPSS1              | 13137.4482 | 5932.28418 | -1.201124 | 0.012692823 |
| TMEM55B             | 1138.12927 | 306.259766 | -1.87518  | 0.011307857 |
| SPSB3               | 622.645386 | 202.719986 | -1.63535  | 0.049281638 |
| IFRD1               | 12775.3154 | 3601.00439 | -1.871042 | 0.000750035 |
| TIMM21              | 8507.33105 | 3818.98291 | -1.201402 | 0.014552662 |
| TGDS                | 1853.15527 | 407.619751 | -2.183025 | 0.002230173 |
| PDZK1               | 13092.1816 | 3883.28662 | -1.797569 | 0.000985788 |
| GPN1                | 3055.95093 | 1044.11694 | -1.554516 | 0.007153056 |
| THOC3 LOC72<br>8554 | 16962.0059 | 3375.39673 | -2.363153 | 0.000121908 |
| KRT12               | 3200.0647  | 1055.01587 | -1.606342 | 0.005683314 |
| SLC3A2              | 8905.49121 | 3537.79077 | -1.377607 | 0.006655386 |
| LTA4H               | 34449.6562 | 5102.87598 | -2.859214 | 2.52994E-05 |
| TEAD4               | 704.864136 | 234.326859 | -1.592756 | 0.044974633 |
| IGF1R               | 3634.25366 | 1649.0072  | -1.148874 | 0.027858542 |
| CCNB1IP1            | 46901.6406 | 12345.2109 | -2.081263 | 0.00023608  |
| UQCRC1              | 8824.19629 | 1543.2876  | -2.544212 | 0.000108077 |
| CDIPT               | 1508.57556 | 374.922974 | -2.000394 | 0.005078503 |

|          |            |            |           |             |
|----------|------------|------------|-----------|-------------|
| AXIN2    | 2214.36353 | 591.811584 | -1.909979 | 0.003438619 |
| MCCC2    | 1156.60535 | 277.922546 | -2.039499 | 0.007549061 |
| NUP88    | 2014.82129 | 764.014587 | -1.400442 | 0.01887795  |
| NDUFS2   | 19585.6152 | 5859.26172 | -1.795298 | 0.000858849 |
| LAP3     | 6202.43457 | 1043.02698 | -2.592444 | 0.000132545 |
| TFB1M    | 12486.1641 | 5544.28271 | -1.224933 | 0.011559892 |
| CYB5D2   | 876.692078 | 277.922546 | -1.643519 | 0.029382298 |
| SLC50A1  | 1755.23181 | 516.609009 | -1.765107 | 0.007405363 |
| HMG20B   | 1147.36731 | 276.832672 | -2.03383  | 0.007771917 |
| ADA      | 1445.75671 | 612.519531 | -1.236441 | 0.044782832 |
| PXN      | 1798.65063 | 764.014587 | -1.233533 | 0.036367532 |
| PMAIP1   | 2847.17065 | 764.014587 | -1.908377 | 0.002413027 |
| TNFRSF1A | 730.730713 | 201.630096 | -1.872739 | 0.024370672 |
| CTSE     | 4276.29883 | 1920.39038 | -1.168098 | 0.023363253 |
| ERO1L    | 1915.05029 | 783.632629 | -1.288675 | 0.028630309 |
| YTHDF2   | 912.72052  | 136.236542 | -2.811866 | 0.003146572 |
| RNFT1    | 1173.23389 | 341.136322 | -1.767849 | 0.013882388 |
| USP18    | 2188.49683 | 839.217163 | -1.384745 | 0.018196747 |
| FPGT     | 1374.62366 | 461.024475 | -1.574718 | 0.01942116  |
| ANAPC7   | 2204.20166 | 943.846802 | -1.223434 | 0.031147491 |
| CLK2     | 686.388    | 115.528595 | -2.671941 | 0.007446153 |
| MAT2A    | 2439.77222 | 837.037354 | -1.548392 | 0.00934939  |
| UNG      | 2041.61169 | 667.01416  | -1.617252 | 0.00982813  |
| PPP2CB   | 7198.29785 | 1206.51086 | -2.599755 | 0.000111951 |
| WARS     | 967.225098 | 310.619324 | -1.622584 | 0.026634596 |
| CYP24A1  | 15282.5254 | 7045.06445 | -1.17164  | 0.013991153 |
| RPS6KB2  | 1716.43188 | 656.115234 | -1.386125 | 0.023631265 |
| APOL1    | 1257.30017 | 526.41803  | -1.252998 | 0.049345769 |
| PPID     | 9105.03418 | 4347.58057 | -1.114968 | 0.020746222 |
| RNF170   | 3073.50317 | 1152.01624 | -1.419068 | 0.011537605 |
| PPP2R5E  | 2693.81885 | 852.295837 | -1.667648 | 0.005597096 |
| ATF4     | 1254.52881 | 386.911804 | -1.688336 | 0.015235533 |
| CENPH    | 3416.23535 | 1627.20935 | -1.077973 | 0.037968792 |
| NADK     | 884.08252  | 320.428375 | -1.451025 | 0.045147277 |
| LYZ      | 660.521423 | 158.034393 | -2.111943 | 0.018856887 |
| C1GALT1  | 3472.5874  | 655.02533  | -2.420815 | 0.000428714 |
| PSMC3    | 668.835693 | 180.922134 | -1.911987 | 0.027454551 |
| PIGK     | 4708.64014 | 1561.8158  | -1.604931 | 0.003959729 |
| CAP2     | 885.006348 | 190.731171 | -2.229874 | 0.008638588 |
| SERPINA1 | 38472.832  | 20687.248  | -1.025895 | 0.024215046 |
| ZNF426   | 448.969818 | 115.528595 | -2.061996 | 0.040588077 |
| GSTM4    | 1546.45154 | 341.136322 | -2.169036 | 0.003254328 |
| PLSCR1   | 1145.51965 | 361.844269 | -1.650365 | 0.019284889 |
| FGA      | 9828.37402 | 4713.78467 | -1.111361 | 0.020579342 |

|                                  |            |            |           |             |
|----------------------------------|------------|------------|-----------|-------------|
| SEC16A                           | 858.215942 | 265.933746 | -1.680314 | 0.02804211  |
| AP3S1                            | 11915.252  | 3137.80029 | -1.969862 | 0.00053722  |
| MORF4L2                          | 6029.68311 | 560.204712 | -3.456214 | 2.54664E-05 |
| MICU2                            | 15043.2598 | 4710.51514 | -1.717543 | 0.001286089 |
| IK                               | 7429.24951 | 2380.32495 | -1.677036 | 0.002139186 |
| GTF2H2 GTF2<br>H2C GTF2H2C<br>_2 | 31572.9238 | 12809.5049 | -1.410165 | 0.004082518 |
| TWF2                             | 13506.9707 | 4227.69238 | -1.719921 | 0.001326398 |
| TULP3                            | 3479.97803 | 1690.4231  | -1.050248 | 0.041722879 |
| XBP1                             | 11916.1758 | 2383.59473 | -2.360251 | 0.000147302 |
| MYH3                             | 766.759155 | 265.933746 | -1.51997  | 0.046690762 |
| NASP                             | 50952.5312 | 24100.791  | -1.252416 | 0.008086486 |
| CRTAP                            | 2133.99219 | 675.733276 | -1.663523 | 0.007606721 |
| EXOSC2                           | 2358.47729 | 1120.40942 | -1.072139 | 0.049656916 |
| POLR2D                           | 795.397156 | 256.124725 | -1.629342 | 0.03499819  |
| PPP2R2A                          | 2106.27808 | 481.732422 | -2.134483 | 0.002009941 |
| DNAJB14                          | 1970.47864 | 601.620605 | -1.71456  | 0.007256988 |
| SPP1                             | 7731.33398 | 3505.09399 | -1.184562 | 0.016248686 |
| LDHA                             | 188419.516 | 115253.938 | -1.084933 | 0.017108388 |
| HPD                              | 4699.40186 | 1852.81702 | -1.357511 | 0.010348836 |
| NOB1                             | 5451.38037 | 2145.99805 | -1.368473 | 0.00897564  |
| RPS10-NUDT3<br> NUDT3            | 8045.42822 | 3861.48877 | -1.104094 | 0.022676149 |
| RUVBL2                           | 2902.59912 | 1344.92725 | -1.114022 | 0.041343492 |
| WIPI1                            | 8326.26562 | 3632.61133 | -1.241609 | 0.012321615 |
| SLC25A20                         | 1755.23181 | 634.317383 | -1.467785 | 0.017893849 |
| FUCA2                            | 15208.6211 | 7791.64062 | -1.021607 | 0.027745614 |
| CHORDC1 LO<br>C727896            | 1581.55615 | 655.02533  | -1.269661 | 0.036955394 |
| TUBE1                            | 1084.54846 | 299.720398 | -1.835657 | 0.01348915  |
| SNAI1                            | 7912.3999  | 3872.3877  | -1.075729 | 0.025786357 |
| SRSF9                            | 44386.1172 | 11965.9287 | -2.042682 | 0.000274224 |
| PCNA                             | 91995.3906 | 46776.     | -1.258131 | 0.007590317 |
| SUMO1 SUMO<br>1P3                | 29241.2383 | 9903.85254 | -1.662453 | 0.001349458 |
| ING4                             | 1131.6626  | 428.327698 | -1.395811 | 0.037778314 |
| TSC22D1                          | 5559.46582 | 1529.11902 | -1.880075 | 0.001256582 |
| EIF3L                            | 11083.8271 | 4670.18896 | -1.299178 | 0.008610619 |
| SNX7                             | 5035.66748 | 1800.5022  | -1.500126 | 0.005611591 |
| GRPEL1                           | 3380.20679 | 1570.53491 | -1.113349 | 0.033423405 |
| RNF130                           | 5749.76953 | 1906.2218  | -1.614643 | 0.003256341 |
| KPNA2                            | 10216.373  | 3323.08179 | -1.667612 | 0.001855366 |
| CSMD2                            | 2485.9624  | 926.408508 | -1.427617 | 0.01378083  |

|                      |            |            |           |             |
|----------------------|------------|------------|-----------|-------------|
| VAPA                 | 28328.5176 | 13455.8115 | -1.167989 | 0.012798023 |
| SFN                  | 3779.29102 | 1735.10864 | -1.132856 | 0.028917043 |
| GNB2                 | 2240.22998 | 815.239502 | -1.461497 | 0.013747528 |
| RPL4                 | 90158.8672 | 36351.1797 | -1.562251 | 0.001841298 |
| HIBCH                | 4574.68848 | 1604.32153 | -1.523917 | 0.005515796 |
| LOC93622             | 1021.72968 | 291.001282 | -1.792212 | 0.016466279 |
| YARS                 | 3037.47485 | 1075.72375 | -1.502084 | 0.008663046 |
| KLF6                 | 2657.79053 | 960.19519  | -1.473521 | 0.010976381 |
| COTL1                | 2032.37366 | 794.531555 | -1.355921 | 0.021629997 |
| ARPC1A               | 36611.3633 | 11222.6221 | -1.835612 | 0.000630305 |
| RNF34                | 8154.43701 | 3470.21729 | -1.276628 | 0.010680798 |
| UBE2I                | 52687.4375 | 14641.6143 | -2.008064 | 0.000304362 |
| TIFA                 | 7700.84863 | 3591.19531 | -1.144066 | 0.019385414 |
| GNL3                 | 14538.8623 | 4197.17578 | -1.83405  | 0.000818297 |
| NDRG1                | 13924.5303 | 7174.76172 | -1.014733 | 0.029099738 |
| RBPJ                 | 38173.5195 | 13423.1143 | -1.637909 | 0.001433376 |
| RSU1                 | 1825.44104 | 321.51825  | -2.494088 | 0.001131899 |
| RNPS1                | 9392.33789 | 2542.71899 | -1.92584  | 0.000720284 |
| NUTF2                | 12052.8994 | 6257.07227 | -1.004452 | 0.031391181 |
| UBE2V2               | 874.844482 | 319.33847  | -1.440863 | 0.046882015 |
| EWSR1                | 2376.95337 | 827.228333 | -1.52727  | 0.010331624 |
| MORF4L1              | 32813.5977 | 14212.1963 | -1.317053 | 0.006246113 |
| TMEM230              | 106516.703 | 59166.9883 | -1.157456 | 0.012233279 |
| RPL15                | 19992.0898 | 9072.26465 | -1.206224 | 0.011301206 |
| PIGC                 | 7701.77197 | 1570.53491 | -2.320594 | 0.000226287 |
| VDAC1                | 75871.2812 | 36092.875  | -1.316726 | 0.005800213 |
| EIF3E                | 108866.867 | 66551.0078 | -1.030934 | 0.022446172 |
| NT5C3A               | 20406.8789 | 9830.8291  | -1.122961 | 0.016558671 |
| FBXO25               | 10884.2842 | 4390.08643 | -1.361528 | 0.006584501 |
| PIH1D2               | 3534.48242 | 1690.4231  | -1.072849 | 0.037938055 |
| CS                   | 1210.18616 | 427.237823 | -1.496834 | 0.026506886 |
| METTL2B              | 6156.24463 | 1982.51428 | -1.659807 | 0.006605715 |
| PSMD10               | 22522.3945 | 11350.1396 | -1.068134 | 0.021037923 |
| CLN3                 | 1561.23242 | 513.339294 | -1.603925 | 0.01390513  |
| SMS                  | 17216.0527 | 5826.56494 | -1.607579 | 0.001944045 |
| TAF1A                | 2132.14478 | 764.014587 | -1.483677 | 0.013510755 |
| EIF4A2               | 132230.844 | 33500.0234 | -2.24212  | 0.000121236 |
| HSP90B1 HSP<br>90B2P | 12594.25   | 5058.19043 | -1.366591 | 0.006125065 |
| CLDN2                | 569.064636 | 147.135468 | -2.012934 | 0.0291028   |
| IMP3                 | 8282.84668 | 2707.29272 | -1.653663 | 0.002195239 |
| MORF4L1              | 18924.1699 | 6764.96191 | -1.540147 | 0.002530174 |
| SFN                  | 4195.00391 | 1606.50134 | -1.394968 | 0.009703705 |
| PCBP1                | 33500.9062 | 15916.7881 | -1.182274 | 0.011729825 |

|                                   |            |            |           |             |
|-----------------------------------|------------|------------|-----------|-------------|
| PIH1D1                            | 8010.32324 | 2568.87646 | -1.679086 | 0.002024752 |
| PRRC1                             | 1237.90027 | 514.429199 | -1.263781 | 0.048688032 |
| ZPR1                              | 3505.84448 | 1216.31995 | -1.532642 | 0.006748573 |
| GOLGA7                            | 25795.4395 | 13209.4961 | -1.051379 | 0.022351703 |
| IDH1                              | 18515.8477 | 5155.19092 | -1.890513 | 0.000601403 |
| WDR13                             | 630.959656 | 156.944504 | -2.057302 | 0.02252472  |
| DIP2B                             | 1553.84204 | 610.339722 | -1.34633  | 0.02984898  |
| RNFT1                             | 4075.83301 | 1560.72595 | -1.394477 | 0.009940161 |
| MTX2                              | 10188.6582 | 5048.38135 | -1.067109 | 0.024767803 |
| TUBE1                             | 1192.63379 | 158.034393 | -2.955949 | 0.00133144  |
| DHRS7                             | 18752.3418 | 9030.84863 | -1.115328 | 0.017402111 |
| ZCCHC8                            | 1543.68018 | 645.216309 | -1.256307 | 0.039438974 |
| ETFA                              | 31184.9258 | 14169.6914 | -1.241883 | 0.008936601 |
| CBL                               | 696.549866 | 211.439117 | -1.732282 | 0.034558658 |
| PDE6D                             | 11718.4814 | 3742.69043 | -1.694112 | 0.00156325  |
| OSGEPL1                           | 1434.67102 | 277.922546 | -2.352441 | 0.002502694 |
| PIGU                              | 2375.10571 | 15.258493  | NA        | NA          |
| ELF3                              | 1797.72681 | 493.721252 | -1.865927 | 0.005377567 |
| BMP4                              | 42371.293  | 19814.2441 | -1.23559  | 0.008900348 |
| TUBA4A                            | 1962.16431 | 806.520386 | -1.282317 | 0.028538743 |
| C11orf58                          | 23264.2109 | 7950.76514 | -1.625063 | 0.001663385 |
| SERPINI1                          | 4972.84863 | 1108.42053 | -2.177846 | 0.000530622 |
| DNTTIP2                           | 1166.76721 | 473.013306 | -1.299399 | 0.047146484 |
| CBR1                              | 1997.26904 | 805.430481 | -1.310373 | 0.025575336 |
| TCEAL1                            | 2746.47583 | 1087.71265 | -1.339418 | 0.017056622 |
| AKAP8L                            | 3558.50146 | 1268.63477 | -1.493983 | 0.007665928 |
| GTF2H4                            | 1599.10852 | 320.428375 | -2.305617 | 0.002221468 |
| NDUFAF1                           | 3244.40723 | 1464.81543 | -1.15357  | 0.029511068 |
| FUS                               | 18870.5898 | 7745.86523 | -1.343772 | 0.00608182  |
| SBDS SBDSP1                       | 35815.043  | 16263.374  | -1.25491  | 0.008268085 |
| LYRM7                             | 1896.5741  | 732.407715 | -1.373282 | 0.022183429 |
| FAM133B FAM<br>133DP FAM13<br>3CP | 6483.27197 | 2478.41528 | -1.420249 | 0.006536301 |
| ARPC5                             | 17874.7266 | 4261.479   | -2.107026 | 0.000275216 |
| YBX3P1 YBX3                       | 2194.96362 | 384.732025 | -2.513123 | 0.000754464 |
| PERP                              | 14140.7012 | 4150.31006 | -1.810983 | 0.000905619 |
| NEK2                              | 2268.86792 | 859.92511  | -1.402138 | 0.016532147 |
| PRMT2                             | 750.130615 | 246.315674 | -1.605392 | 0.040096194 |
| DCAF16                            | 1111.33887 | 268.113525 | -2.03619  | 0.00820597  |
| CNOT2                             | 3370.96875 | 1237.02783 | -1.4514   | 0.009420442 |
| GUSBP3                            | 4131.26123 | 1897.50269 | -1.134881 | 0.027200829 |
| NUP35                             | 3011.60815 | 1216.31995 | -1.311654 | 0.017371303 |
| RPL4                              | 234136.828 | 127644.93  | -1.257781 | 0.007402549 |

|                                      |            |            |           |             |
|--------------------------------------|------------|------------|-----------|-------------|
| CDK11A CDK1<br>1B                    | 1426.35681 | 478.462769 | -1.574601 | 0.01713782  |
| WRB                                  | 6265.25342 | 1561.8158  | -2.025922 | 0.00068547  |
| UTP6                                 | 5559.46582 | 559.114807 | -3.339361 | 3.37935E-05 |
| DDX21                                | 25742.7832 | 11462.3984 | -1.257474 | 0.008534317 |
| APOBEC3B AP<br>OBEC3A APO<br>BEC3A_B | 3968.67139 | 817.419312 | -2.292542 | 0.000499463 |
| TXNDC12                              | 33022.375  | 15820.8779 | -1.168702 | 0.012525157 |
| NDRG2                                | 2692.89502 | 795.62146  | -1.767774 | 0.004042124 |
| DRAM2                                | 5264.77148 | 1669.71509 | -1.673761 | 0.002792759 |
| PIPOX                                | 5551.15137 | 1452.82654 | -1.951204 | 0.000984029 |
| NRBP1                                | 3950.19531 | 990.712158 | -2.004572 | 0.001181387 |
| SRP68                                | 3325.70239 | 591.811584 | -2.504964 | 0.000372085 |
| RNASE4                               | 15236.3359 | 3698.00488 | -2.081299 | 0.000321352 |
| SMN2 SMN1                            | 17784.1934 | 5846.18262 | -1.651624 | 0.001597456 |
| CHEK2                                | 6057.39697 | 2599.39331 | -1.252676 | 0.013606431 |
| GCDH                                 | 1273.00488 | 297.540619 | -2.078417 | 0.005780394 |
| TRAM2                                | 1301.64294 | 536.227051 | -1.276601 | 0.044489764 |
| CMAS                                 | 5395.95215 | 2132.91943 | -1.362059 | 0.00927191  |
| PRCP                                 | 1806.96497 | 770.553894 | -1.227852 | 0.036875282 |
| GABARAPL1                            | 1725.66992 | 635.407288 | -1.440375 | 0.01986523  |
| RBPJ                                 | 76097.6094 | 42834.9492 | -1.09473  | 0.016749455 |
| RNPS1                                | 3507.69214 | 837.037354 | -2.078294 | 0.001090187 |
| GLUD2                                | 1616.66089 | 689.901855 | -1.226407 | 0.041258778 |
| EIF2A                                | 4755.75439 | 1724.20972 | -1.477867 | 0.00639002  |
| HDHD2                                | 1590.79431 | 439.226624 | -1.855176 | 0.006738706 |
| GLTP                                 | 1744.14612 | 568.923828 | -1.616067 | 0.01153524  |
| PSRC1                                | 1066.07239 | 353.125122 | -1.580933 | 0.025509317 |
| FGFR1OP2 LO<br>C100335030            | 659.597595 | 104.629669 | -2.781864 | 0.007073163 |
| PEX13                                | 2575.57178 | 1160.73535 | -1.150191 | 0.035352264 |
| PARP2                                | 5053.21973 | 1368.90479 | -1.897937 | 0.001290559 |
| DCAF7                                | 3560.34912 | 967.824463 | -1.887645 | 0.001943769 |
| PPP1R35                              | 4141.42334 | 2090.41357 | -1.001473 | 0.045890648 |
| ZNF830                               | 3450.41602 | 1421.21973 | -1.28639  | 0.017092697 |
| LYPLA2                               | 884.08252  | 213.618912 | -2.055924 | 0.012068903 |
| SHISA5                               | 1572.31812 | 494.811157 | -1.667451 | 0.011498593 |
| KLHDC2                               | 6320.68213 | 2427.19043 | -1.41236  | 0.006853841 |
| CCT8                                 | 46609.7188 | 23546.0352 | -1.147393 | 0.013414582 |
| COX7A2L                              | 52389.0508 | 21596.2168 | -1.444729 | 0.003278611 |
| CFDP1                                | 5352.5332  | 2556.88745 | -1.093658 | 0.028005498 |
| RAPGEF6                              | 614.331116 | 160.214188 | -1.985703 | 0.026663212 |
| KATNA1                               | 3496.60645 | 1152.01624 | -1.606633 | 0.005183647 |

|             |            |            |           |             |
|-------------|------------|------------|-----------|-------------|
| YIPF3       | 2982.97021 | 1195.61194 | -1.322364 | 0.016842408 |
| OAS1        | 11608.5488 | 5067.99951 | -1.248991 | 0.010603637 |
| RPL4        | 190706.859 | 72844.0469 | -1.748164 | 0.000788173 |
| NBPF14      | 6012.13086 | 1226.12891 | -2.31187  | 0.000291856 |
| EEF1A1      | 204939.938 | 109789.219 | -1.274508 | 0.006847864 |
| HNRNPC      | 548.740906 | 127.51741  | -2.191251 | 0.023542799 |
| LUZP1       | 1346.90942 | 544.946167 | -1.302893 | 0.039761975 |
| HNRNPA1L2 H | 38148.5781 | 20742.832  | -1.009004 | 0.026233342 |
| NRNPA1 HNR  |            |            |           |             |
| NPA1P10     |            |            |           |             |
| CES1        | 838.81604  | 235.416748 | -1.833271 | 0.020905891 |
| NBPF15 NBPF | 2340.9248  | 719.328979 | -1.709073 | 0.005838482 |
| 14 NBPF11   |            |            |           |             |
| HNRNPCL1 H  | 3597.30127 | 850.116089 | -2.092305 | 0.00101169  |
| NRNPCL3 HN  |            |            |           |             |
| RNPCL2      |            |            |           |             |
| GPKOW       | 2069.32593 | 566.744019 | -1.873046 | 0.004239014 |
| RBMX        | 2575.57178 | 535.137146 | -2.278015 | 0.000988197 |
| HNRNPCL3 H  | 5019.03906 | 1022.31903 | -2.309729 | 0.000356577 |
| NRNPCL1 HN  |            |            |           |             |
| RNPCL2      |            |            |           |             |
| TMEM69      | 6329.91992 | 1000.52124 | -2.683278 | 0.000103939 |
| FANCL       | 2278.10596 | 622.328552 | -1.878884 | 0.003610437 |
| SEC61A2     | 967.225098 | 329.147491 | -1.54122  | 0.03228211  |
| SLC25A5     | 739.96875  | 178.742355 | -2.075753 | 0.016583409 |
| ZCCHC7      | 2386.19141 | 935.127686 | -1.353677 | 0.018516691 |
| GOLGA8T LOC | 1084.54846 | 384.732025 | -1.484997 | 0.031693932 |
| 645752 GOLG |            |            |           |             |
| A6D GOLGA6B |            |            |           |             |
| GOLGA6A     |            |            |           |             |
| HNRNPCL2 H  | 767.682922 | 170.023209 | -2.208654 | 0.01194205  |
| NRNPCL3 HN  |            |            |           |             |
| RNPCL1      |            |            |           |             |
| SMS         | 342.732086 | 63.21376   | -2.701605 | 0.03189401  |
| EIF3IP1     | 3037.47485 | 720.418884 | -2.088289 | 0.001287337 |
| PDHA1       | 23444.3535 | 6334.45459 | -1.958899 | 0.000430535 |
| CENPA       | 3561.27295 | 1131.30835 | -1.659768 | 0.004213375 |
| OMA1        | 2577.41919 | 1001.61108 | -1.366607 | 0.016424639 |
| TUSC2       | 1470.69946 | 483.912231 | -1.602665 | 0.015167839 |
| TBC1D7      | 2828.69458 | 958.015381 | -1.567996 | 0.00740956  |
| NINJ1       | 1581.55615 | 676.823181 | -1.222242 | 0.04269515  |
| TMEM237     | 8850.06348 | 4377.00781 | -1.063864 | 0.026180819 |
| HAT1        | 18335.7051 | 6235.27441 | -1.607155 | 0.001911319 |
| TRUB2       | 4520.18359 | 828.318237 | -2.463167 | 0.000267054 |

|            |            |            |           |             |
|------------|------------|------------|-----------|-------------|
| HSPBAP1    | 1219.42419 | 204.899765 | -2.5802   | 0.002282785 |
| FAM49B     | 4061.052   | 634.317383 | -2.695003 | 0.000176998 |
| HOXA5      | 1400.49023 | 331.327271 | -2.066004 | 0.004966136 |
| PCCB       | 8444.5127  | 1670.80505 | -2.366272 | 0.00018355  |
| IMPDH2     | 17260.3945 | 2319.29102 | -2.92116  | 2.82646E-05 |
| LSM4       | 10244.0869 | 3850.58984 | -1.460714 | 0.004388124 |
| ID3        | 71722.4688 | 39640.4766 | -1.109689 | 0.015634414 |
| PROCR      | 7079.12695 | 2383.59473 | -1.604644 | 0.002934752 |
| TMCO1      | 9505.04199 | 4120.8833  | -1.254352 | 0.011076734 |
| CDK4       | 16654.3789 | 6852.15332 | -1.331986 | 0.006608309 |
| HDAC8      | 1906.73596 | 322.608154 | -2.553413 | 0.000916981 |
| UMAD1      | 1047.59619 | 234.326859 | -2.156604 | 0.007101816 |
| LINC00998  | 15651.124  | 7919.1582  | -1.03888  | 0.025518911 |
| TTC3       | 1298.87146 | 446.855865 | -1.536511 | 0.02163408  |
| RBM41      | 1807.88867 | 504.620178 | -1.842589 | 0.00568863  |
| ARL6IP6    | 5523.43701 | 935.127686 | -2.581247 | 0.000155029 |
| GMPS       | 739.96875  | 212.529022 | -1.810503 | 0.02691336  |
| MTIF2      | 2107.2019  | 787.992188 | -1.421181 | 0.016798187 |
| NIT1       | 1364.46179 | 450.125549 | -1.59783  | 0.017089585 |
| RNF170     | 741.816345 | 245.225784 | -1.59628  | 0.04152761  |
| SERPINF1   | 12648.7539 | 2351.98779 | -2.463225 | 0.000105343 |
| CKB        | 3761.73877 | 748.756042 | -2.342977 | 0.000468216 |
| MRPL44     | 7458.81104 | 2855.51807 | -1.425324 | 0.005920448 |
| AHSA1      | 14229.3867 | 7390.56006 | -1.003168 | 0.030529676 |
| RTCA       | 7910.55225 | 3127.99121 | -1.380903 | 0.006929903 |
| MSRB1      | 2675.34277 | 1031.03821 | -1.379099 | 0.015173015 |
| GDF15      | 108151.836 | 20462.7305 | -2.605141 | 4.05045E-05 |
| NUDT9      | 5895.73096 | 2349.80811 | -1.355614 | 0.009016767 |
| DDOST      | 79984.9844 | 47899.6797 | -1.019356 | 0.023960326 |
| MAGEF1     | 2296.58228 | 1032.12805 | -1.153052 | 0.038292173 |
| IMPA2      | 3397.75928 | 471.923401 | -2.864035 | 0.000164056 |
| PSMG2      | 3950.19531 | 1972.7052  | -1.014716 | 0.044631194 |
| TCEAL8     | 1770.93652 | 708.430054 | -1.320823 | 0.027999898 |
| C16orf87   | 12261.6797 | 4444.58105 | -1.511994 | 0.003280198 |
| HLA-F      | 648.511963 | 115.528595 | -2.590379 | 0.009443814 |
| TAF12      | 2168.1731  | 1010.33026 | -1.099652 | 0.048104756 |
| ARPC1B     | 4030.56641 | 395.630951 | -3.361369 | 5.24307E-05 |
| CENPL      | 793.5495   | 244.135895 | -1.698987 | 0.030290196 |
| FBXL4      | 1173.23389 | 395.630951 | -1.559727 | 0.024330569 |
| IDH3B      | 21010.125  | 5143.20215 | -2.086116 | 0.00027957  |
| ALG8       | 14321.7676 | 2135.09912 | -2.77518  | 4.35204E-05 |
| AURKB      | 1454.07092 | 578.732849 | -1.326958 | 0.034054078 |
| HNRNPA1P10 | 78003.4219 | 24034.3066 | -1.902884 | 0.000438164 |
| HNRNPA1L2  |            |            |           |             |



|                      |            |            |           |             |
|----------------------|------------|------------|-----------|-------------|
| HACD3                | 6616.2998  | 2843.5293  | -1.255763 | 0.012844972 |
| CD99                 | 4701.24951 | 2330.18994 | -1.033771 | 0.037984364 |
| SNX1                 | 1129.81494 | 409.79953  | -1.455538 | 0.032373685 |
| RNPS1                | 2107.2019  | 214.708801 | -3.307106 | 0.000202493 |
| LRRFIP1              | 3200.98853 | 709.519958 | -2.186622 | 0.00090231  |
| NBEAL1               | 946.901367 | 265.933746 | -1.820247 | 0.017525444 |
| RSL1D1               | 32097.6465 | 12497.7959 | -1.472296 | 0.003068345 |
| KLF6                 | 20388.4023 | 1831.01917 | -3.508713 | 8.88504E-06 |
| BCAP31               | 9058.84375 | 4045.68066 | -1.210543 | 0.013661075 |
| MALAT1               | 29475.8848 | 15087.3799 | -1.061143 | 0.021035746 |
| RNFT1                | 1120.5769  | 331.327271 | -1.742121 | 0.015925016 |
| CCZ1 CCZ1B           | 16237.7412 | 7866.84326 | -1.100193 | 0.019156823 |
| RTN3                 | 2648.55225 | 622.328552 | -2.100465 | 0.001521143 |
| VDAC2                | 30876.375  | 14102.1172 | -1.233392 | 0.009311509 |
| ATXN7L3B             | 2222.67773 | 17.438278  | NA        | NA          |
| NBPF15 NBPF14 NBPF11 | 2882.27539 | 923.138855 | -1.649518 | 0.005495102 |
| YKT6                 | 1383.86169 | 267.023621 | -2.360946 | 0.002648555 |
| CLMN                 | 1236.97644 | 277.922546 | -2.137081 | 0.005352515 |
| NA                   | 415.712799 | 95.91053   | -2.263606 | 0.035507146 |
| DDX41                | 1438.36621 | 234.326859 | -2.615835 | 0.001478547 |
| GFPT1                | 776.921021 | 265.933746 | -1.538705 | 0.044032324 |
| GGNBP2               | 18444.7148 | 6191.67871 | -1.626079 | 0.00176025  |
| RAF1                 | 1256.37646 | 461.024475 | -1.444065 | 0.029089978 |
| TRA2B                | 22125.1582 | 6558.97217 | -1.821607 | 0.000745907 |
| AKAP2 PALM2-AKAP2    | 595.85498  | 126.427521 | -2.323441 | 0.016509743 |
| RHNO1                | 4249.5083  | 884.992615 | -2.275817 | 0.000479378 |
| FNBP1L               | 2532.15283 | 816.329407 | -1.639684 | 0.006612241 |
| UGT2B28 UGT2B11      | 913.644348 | 332.417175 | -1.446243 | 0.043775395 |
| BCKDHA               | 1472.54712 | 373.833099 | -1.969372 | 0.005726059 |
| ZNF7                 | 1690.56531 | 408.709656 | -2.04466  | 0.003713743 |
| GJB1                 | 11453.3496 | 2328.01025 | -2.337799 | 0.00016139  |
| TMEM101              | 8933.20605 | 3784.10645 | -1.285817 | 0.009949588 |
| HNRNPA0              | 2566.3335  | 515.519104 | -2.326831 | 0.000878764 |
| FIBP                 | 1237.90027 | 362.934174 | -1.758797 | 0.013018327 |
| HSPA8                | 23417.5625 | 2664.78687 | -3.188622 | 1.43712E-05 |
| DNAJB6               | 6835.24219 | 925.318665 | -2.910756 | 5.7629E-05  |
| SUMO1 SUMO1P3        | 50417.6484 | 13618.2051 | -2.047402 | 0.000264421 |
| SNX5                 | 64197.1406 | 19315.0723 | -1.909032 | 0.000435651 |
| CHMP4B               | 30562.2793 | 11535.4209 | -1.513931 | 0.002564173 |
| IGBP1                | 533.959961 | 159.124283 | -1.795229 | 0.046355393 |

|             |            |            |           |             |
|-------------|------------|------------|-----------|-------------|
| PSMC2       | 46783.3945 | 14039.9941 | -1.887517 | 0.000492921 |
| CCT2        | 39594.332  | 4162.29883 | -3.366265 | 8.91661E-06 |
| ALG1        | 812.949463 | 171.113098 | -2.279883 | 0.009392791 |
| BIRC5       | 2911.83716 | 1250.10657 | -1.223401 | 0.024665531 |
| ALDOC       | 2024.05933 | 384.732025 | -2.393912 | 0.001148882 |
| ADA         | 803.711365 | 246.315674 | -1.703566 | 0.029379157 |
| MORF4L1     | 1402.33777 | 590.72168  | -1.244638 | 0.045076121 |
| 15-Sep      | 63156.9336 | 14830.166  | -2.267455 | 0.000118772 |
| IDI1        | 8390.00781 | 2804.29321 | -1.62262  | 0.00246766  |
| LGMN        | 1534.44214 | 115.528595 | -3.826792 | 0.000244627 |
| TUBA1C      | 37161.9531 | 5460.36084 | -2.882132 | 2.35488E-05 |
| MLF2        | 4056.43286 | 1216.31995 | -1.744781 | 0.0027341   |
| PRIMPOL     | 613.407288 | 159.124283 | -1.994539 | 0.026343957 |
| TMX2-CTNND1 | 3724.78662 | 515.519104 | -2.869687 | 0.000139609 |
| TMX2        |            |            |           |             |
| PRDX3       | 42441.5039 | 5672.88965 | -3.035926 | 1.63187E-05 |
| TAB2        | 2232.8396  | 980.903137 | -1.1861   | 0.034985207 |
| CNBP        | 10434.3906 | 3095.29443 | -1.80005  | 0.001087409 |
| DAZAP2      | 2992.20825 | 850.116089 | -1.824468 | 0.002947677 |
| CCR6        | 1546.45154 | 515.519104 | -1.583971 | 0.014916468 |
| CDC45       | 522.874329 | 126.427521 | -2.135701 | 0.028022572 |
| SF3A3       | 6021.36865 | 719.328979 | -3.092033 | 4.65373E-05 |
| CCDC82      | 1472.54712 | 353.125122 | -2.0494   | 0.00470806  |
| RNF41       | 667.911865 | 170.023209 | -2.010112 | 0.022059536 |
| ZNF791      | 361.208221 | 71.9329    | -2.542908 | 0.033636458 |
| CSDE1       | 2908.14185 | 1162.91516 | -1.325149 | 0.017090626 |
| CEP76       | 939.510925 | 354.215027 | -1.396775 | 0.047534399 |
| TSPAN12     | 2024.05933 | 753.115662 | -1.428182 | 0.017164126 |
| TCP11L2     | 3996.3855  | 667.01416  | -2.598855 | 0.000225876 |
| EIF2AK1     | 3857.8147  | 1604.32153 | -1.275054 | 0.016429355 |
| UTP15       | 1227.7384  | 246.315674 | -2.309917 | 0.003771169 |
| ANGEL2      | 1002.32971 | 277.922546 | -1.834092 | 0.015446182 |
| MAGT1       | 2177.41113 | 913.329834 | -1.253515 | 0.028439598 |
| SLC2A3      | 7405.23047 | 2383.59473 | -1.670368 | 0.002200262 |
| HNRNPR      | 16087.1611 | 7932.23682 | -1.075257 | 0.021509664 |
| RSRP1       | 1898.42175 | 418.518677 | -2.181461 | 0.002142684 |
| RBM45       | 2031.44983 | 902.430908 | -1.169028 | 0.040186066 |
| C2orf15     | 1147.36731 | 406.529846 | -1.48918  | 0.029123161 |
| RTFDC1      | 13180.8672 | 2815.19214 | -2.266976 | 0.000185515 |
| CA14        | 677.149963 | 211.439117 | -1.691843 | 0.039203171 |
| SRPX2       | 18108.4492 | 7583.47119 | -1.311251 | 0.007118659 |
| ERICH1      | 4547.89795 | 1228.30872 | -1.897923 | 0.001433453 |
| ARHGDI1B    | 99526.2578 | 58000.8047 | -1.084025 | 0.017451264 |
| NSRP1       | 4060.12817 | 1863.71594 | -1.13504  | 0.027457815 |

|           |            |            |           |             |
|-----------|------------|------------|-----------|-------------|
| MFAP1     | 3381.13062 | 481.732422 | -2.827101 | 0.000178046 |
| ZCCHC10   | 4464.75537 | 2219.021   | -1.026852 | 0.040027741 |
| UNCX      | 2710.44727 | 1128.03857 | -1.266778 | 0.022364153 |
| SLC16A9   | 377.836731 | 95.91053   | -2.122118 | 0.049920496 |
| OR2AG1    | 4963.61084 | 1304.6012  | -1.940505 | 0.001136182 |
| OR10AD1   | 7584.44873 | 754.205505 | -3.361687 | 2.26202E-05 |
| KRTAP20-4 | 1284.09058 | 204.899765 | -2.655255 | 0.001778611 |
| DDOST     | 77327.1953 | 13512.4854 | -2.708943 | 3.17202E-05 |
| LACE1     | 2539.54321 | 992.891968 | -1.357621 | 0.017193196 |
| SLC25A40  | 1537.2135  | 577.642944 | -1.410455 | 0.024961628 |
| ALB       | 74848.625  | 26083.3047 | -1.730315 | 0.000893741 |
| GALT      | 2871.1897  | 1097.52161 | -1.39087  | 0.013605996 |
| TRMT11    | 2765.87573 | 568.923828 | -2.294037 | 0.000844446 |
| ILF2      | 15805.4004 | 7736.05615 | -1.086065 | 0.020541458 |
| FAM49B    | 21274.332  | 8428.1377  | -1.405845 | 0.004469502 |
| SNRNP40   | 3821.78613 | 1873.52502 | -1.039635 | 0.041235793 |
| YBX1      | 146527.672 | 73933.9375 | -1.336031 | 0.005146547 |
| AKR1B1    | 42895.0938 | 23742.2148 | -1.008182 | 0.026104573 |
| ID2       | 69704.875  | 36977.8672 | -1.159443 | 0.012338034 |
| TMEM59    | 53943.8164 | 25868.5957 | -1.243481 | 0.008399161 |
| SGCE      | 17116.2812 | 8437.94727 | -1.074519 | 0.02134032  |
| MTRF2     | 3803.31006 | 1355.82617 | -1.495497 | 0.007180005 |
| PRDX3     | 109299.203 | 34814.4336 | -1.90385  | 0.00042583  |
| SLC50A1   | 1961.2406  | 903.520813 | -1.115537 | 0.049397212 |
| KARS      | 55327.6758 | 29700.6582 | -1.095144 | 0.016999833 |
| LIAS      | 9874.56445 | 5111.59521 | -1.003848 | 0.033004243 |
| PKIB      | 12847.373  | 6213.47656 | -1.10429  | 0.019767439 |
| SDCBP     | 9256.53809 | 3796.09521 | -1.333177 | 0.007932254 |
| CCBL2     | 9837.6123  | 5082.16797 | -1.006526 | 0.032650691 |
| BTF3      | 8715.1875  | 3894.18555 | -1.208722 | 0.01396799  |
| RBMS1     | 8968.31055 | 3838.60107 | -1.271078 | 0.010524525 |
| SLC4A1AP  | 1644.375   | 719.328979 | -1.190594 | 0.045344319 |
| GLRX      | 3823.63379 | 1808.13147 | -1.090751 | 0.033814482 |
| PSMD12    | 19520.9492 | 9034.11816 | -1.175941 | 0.016333139 |
| SDHD      | 21482.1895 | 9332.74805 | -1.275252 | 0.008105579 |
| SEC22C    | 5990.8833  | 1583.61365 | -1.940058 | 0.000955011 |
| SMPDL3B   | 703.940308 | 202.719986 | -1.811385 | 0.029126488 |
| RPL7L1    | 38102.3867 | 15474.292  | -1.425108 | 0.003715408 |
| S100PBP   | 1988.03088 | 677.913086 | -1.554663 | 0.011712135 |
| LACTB     | 8444.5127  | 2502.39282 | -1.793215 | 0.001260196 |
| IFT74     | 1644.375   | 419.608582 | -1.967463 | 0.004747764 |
| FBXO4     | 3071.65552 | 1355.82617 | -1.184784 | 0.0273035   |
| ETNK1     | 2800.98047 | 1138.9375  | -1.300697 | 0.019239288 |
| PPHLN1    | 17974.4961 | 8015.06885 | -1.221018 | 0.010778888 |

|          |            |            |           |             |
|----------|------------|------------|-----------|-------------|
| TM9SF1   | 2819.45654 | 1377.62402 | -1.037339 | 0.049739186 |
| FBXO3    | 1581.55615 | 485.002106 | -1.704963 | 0.033738278 |
| WDR20    | 929.348999 | 340.046417 | -1.438629 | 0.043562975 |
| MSI2     | 2194.96362 | 937.307434 | -1.227425 | 0.030843921 |
| SF3B1    | 8877.77734 | 3689.28564 | -1.313051 | 0.008805122 |
| ORC5     | 3497.53027 | 590.72168  | -2.580895 | 0.000287461 |
| CLK1     | 8986.78711 | 3612.99316 | -1.360766 | 0.007127389 |
| BCKDHB   | 2351.08667 | 977.633484 | -1.266874 | 0.025347004 |
| ADAL     | 1824.51721 | 773.823608 | -1.235876 | 0.03560688  |
| TAF1D    | 26790.3789 | 11914.7031 | -1.261235 | 0.008335778 |
| IP6K2    | 19158.8164 | 8468.46387 | -1.239652 | 0.00976536  |
| HACD2    | 434.188904 | 93.730743  | -2.366862 | 0.028849628 |
| CRIM1    | 2783.42798 | 1227.21887 | -1.184289 | 0.029457392 |
| MBTD1    | 2521.06714 | 859.92511  | -1.557145 | 0.00874254  |
| JMJD6    | 5252.76221 | 1388.52295 | -1.934632 | 0.001096705 |
| CEP63    | 2387.11523 | 1088.80249 | -1.131738 | 0.039991602 |
| MBD2     | 6275.41553 | 2329.1001  | -1.460128 | 0.005662708 |
| GART     | 712.254578 | 244.135895 | -1.545192 | 0.048897337 |
| IKBIP    | 6455.55762 | 3072.40674 | -1.108985 | 0.024163777 |
| PINX1    | 1480.86133 | 634.317383 | -1.220638 | 0.045904264 |
| VWA5A    | 430.493683 | 82.831818  | -2.563111 | 0.023373134 |
| GFM2     | 1807.88867 | 764.014587 | -1.241067 | 0.035325483 |
| IFT81    | 1091.93896 | 319.33847  | -1.756283 | 0.016059078 |
| SLC28A1  | 1300.71912 | 297.540619 | -2.1097   | 0.005167836 |
| LLGL2    | 1226.81458 | 459.934601 | -1.412908 | 0.032626092 |
| PCK2     | 11363.7402 | 3148.69922 | -1.898105 | 0.000716725 |
| MTA3     | 8409.4082  | 2781.40527 | -1.637584 | 0.004743267 |
| MAPKAP1  | 2938.62744 | 1065.91479 | -1.467367 | 0.010127148 |
| IFNAR2   | 3100.29346 | 1161.82532 | -1.41954  | 0.011425459 |
| AGPAT2   | 4094.30908 | 1313.32031 | -1.648356 | 0.003822981 |
| BCCIP    | 61251.1211 | 26062.5957 | -1.428343 | 0.003488423 |
| MPZL2    | 3047.63672 | 1388.52295 | -1.139223 | 0.032513704 |
| USP48    | 1455.91858 | 555.845093 | -1.387251 | 0.028497737 |
| SLC30A5  | 2324.29639 | 861.015015 | -1.435781 | 0.014386779 |
| PPIE     | 4076.75684 | 1929.1095  | -1.092195 | 0.032418974 |
| TNFRSF19 | 2919.22754 | 686.632202 | -2.10012  | 0.001317348 |
| MAX      | 1925.21216 | 480.642548 | -2.005573 | 0.003288186 |
| ITGB1    | 23608.791  | 6461.97217 | -1.941405 | 0.000459142 |
| KYNU     | 38914.4102 | 9161.63574 | -2.220343 | 0.000149897 |
| MAPK14   | 1853.15527 | 710.609863 | -1.383113 | 0.02188427  |
| ZEB1     | 912.72052  | 331.327271 | -1.449416 | 0.043604188 |
| MTERF1   | 3306.30225 | 1601.05188 | -1.053626 | 0.042453528 |
| GLRX3    | 43999.043  | 23212.5273 | -1.078345 | 0.018703412 |
| NCK1     | 2792.66602 | 1172.72424 | -1.254189 | 0.02281224  |

|             |            |            |           |             |
|-------------|------------|------------|-----------|-------------|
| MAD2L1      | 34168.8203 | 17818.6504 | -1.046544 | 0.022201339 |
| RAB4A       | 7351.6499  | 3288.20532 | -1.202486 | 0.015357822 |
| CXorf40B    | 1390.32837 | 222.338043 | -2.646417 | 0.001507478 |
| POFUT1      | 938.587097 | 147.135468 | -2.727627 | 0.003499957 |
| RIOK2       | 6725.30908 | 2069.70557 | -1.729229 | 0.001871551 |
| RBM34       | 7115.15527 | 2006.49194 | -1.855703 | 0.001121647 |
| LGMN        | 11391.4541 | 5134.48291 | -1.203988 | 0.013038776 |
| RFC3        | 1472.54712 | 623.418457 | -1.237564 | 0.043781802 |
| NOVA1       | 5713.74121 | 2337.81909 | -1.316635 | 0.010781225 |
| SAMD4A      | 1138.12927 | 398.900604 | -1.504043 | 0.028261524 |
| ABHD11      | 2024.05933 | 470.833496 | -2.109074 | 0.002306456 |
| IDS         | 1039.28198 | 371.65329  | -1.472901 | 0.034582231 |
| SEPP1       | 52324.3828 | 18108.5625 | -1.683781 | 0.001128921 |
| PTPN2       | 8381.69336 | 3828.79199 | -1.176018 | 0.016345115 |
| CNOT7       | 15651.124  | 6721.36621 | -1.271618 | 0.008822489 |
| RBM34       | 8550.75    | 2187.41406 | -2.001782 | 0.000585088 |
| KDELR3      | 11670.4434 | 5178.07861 | -1.226157 | 0.011723669 |
| GIT2        | 549.664673 | 166.75354  | -1.761424 | 0.047027148 |
| MTFR1       | 1156.60535 | 357.484711 | -1.681377 | 0.017590106 |
| PCBP1       | 50798.2539 | 17457.8965 | -1.692343 | 0.00109184  |
| KPNA2       | 47787.5703 | 9842.81836 | -2.436552 | 7.24991E-05 |
| ERCC2       | 560.750366 | 147.135468 | -1.991786 | 0.030904187 |
| HMGCL       | 6735.4707  | 2274.60547 | -1.597902 | 0.003112455 |
| PRMT1       | 27223.6445 | 13414.3955 | -1.110666 | 0.016830953 |
| LIMS1       | 15442.3447 | 7831.9668  | -1.035741 | 0.025974581 |
| MORF4L1     | 17385.1094 | 8590.53223 | -1.071405 | 0.021587879 |
| AMACR C1QT  | 2487.81006 | 883.90271  | -1.497397 | 0.010852295 |
| NF3-AMACR   |            |            |           |             |
| AMACR       | 1959.39294 | 633.227478 | -1.632096 | 0.009393241 |
| FCF1        | 2467.48633 | 826.138428 | -1.584171 | 0.008191118 |
| PIGY PYURF  | 25815.7637 | 12982.7979 | -1.078128 | 0.019727184 |
| H2AFV       | 4150.66113 | 1660.99597 | -1.331715 | 0.012506239 |
| PWARSN      | 1862.39331 | 461.024475 | -2.017149 | 0.003370796 |
| FAM127A     | 3390.36865 | 1486.61316 | -1.196401 | 0.024345886 |
| ATP5SL      | 1518.73743 | 190.731171 | -3.008077 | 0.000674333 |
| LOC389831   | 1074.3866  | 362.934174 | -1.55351  | 0.027006449 |
| ARMCX6      | 803.711365 | 147.135468 | -2.506875 | 0.006607795 |
| NBPF1 NBPF1 | 1083.62463 | 298.630524 | -1.83956  | 0.013370247 |
| 4 NBPF10    |            |            |           |             |
| MED18       | 983.853577 | 354.215027 | -1.462399 | 0.038215883 |
| MKRN1 MKRN  | 2133.0686  | 459.934601 | -2.220143 | 0.001579436 |
| 7P          |            |            |           |             |
| HLA-C HLA-B | 9980.80176 | 4236.41162 | -1.286059 | 0.009465924 |
| HLA-H       |            |            |           |             |

|                                     |            |            |           |             |
|-------------------------------------|------------|------------|-----------|-------------|
| PDZK1                               | 8055.58984 | 4032.60181 | -1.043885 | 0.029415216 |
| SNRPN SNUR<br>F                     | 3433.7876  | 1335.11816 | -1.368912 | 0.012580686 |
| UBE2M UBE2<br>MP1                   | 7150.25977 | 3192.29492 | -1.204315 | 0.015420544 |
| DNAJB6                              | 10611.7617 | 4302.89502 | -1.353233 | 0.006894573 |
| TUBA3C TUBA<br>3D TUBA3E TU<br>BA1A | 4176.52783 | 1218.49963 | -1.784646 | 0.002308334 |
| MTCH1                               | 2274.41089 | 633.227478 | -1.851349 | 0.00392733  |
| C1GALT1                             | 17476.5664 | 6589.48926 | -1.45614  | 0.003740784 |
| SUMO4                               | 79164.6484 | 38778.3711 | -1.284641 | 0.006738401 |
| WASH1 WASH<br>3P WASH7P W<br>ASH2P  | 1263.76685 | 449.035675 | -1.489879 | 0.026610158 |
| ACOT2                               | 4746.51611 | 2404.30249 | -1.003599 | 0.042677634 |
| HAVCR1                              | 396.312866 | 93.730743  | -2.231678 | 0.040164307 |
| ATRAID                              | 3517.854   | 1746.00757 | -1.019633 | 0.046582677 |
| ATRAID                              | 2005.58325 | 492.631348 | -2.030034 | 0.002877144 |
| ALG11                               | 6247.70117 | 2079.51465 | -1.613962 | 0.003075835 |
| HMG3                                | 4756.67822 | 2114.39111 | -1.188536 | 0.020222524 |
| CXADR                               | 5595.49414 | 2423.92065 | -1.234643 | 0.015296831 |
| BMPR1A                              | 859.139771 | 287.731598 | -1.561956 | 0.039768569 |
| ISCA1                               | 3432.86377 | 1140.02747 | -1.595135 | 0.005524853 |
| GAPDH                               | 236695.781 | 142709.422 | -1.119909 | 0.014398824 |
| GIGYF2                              | 651.283386 | 191.82106  | -1.784063 | 0.034767021 |
| BORA                                | 1182.47192 | 483.912231 | -1.285823 | 0.048222344 |
| FAM213A                             | 23627.2676 | 11158.3184 | -1.16532  | 0.013287811 |
| HNRNPUL2                            | 2649.47607 | 1010.33026 | -1.394482 | 0.014503152 |
| DLD                                 | 19981.0039 | 8590.53223 | -1.283186 | 0.007925574 |
| EIF4G2                              | 3671.20581 | 1647.91724 | -1.164533 | 0.026057743 |
| SDHC                                | 32831.1484 | 15247.5947 | -1.214098 | 0.01011962  |
| PSAT1                               | 17746.3164 | 6061.98145 | -1.597218 | 0.00201982  |
| NA                                  | 2042.53552 | 741.126831 | -1.465013 | 0.015080227 |
| CASP7                               | 2584.80981 | 503.530273 | -2.371464 | 0.000777242 |
| BAAT                                | 8596.94043 | 4356.2998  | -1.028303 | 0.030838262 |
| SNX6                                | 10587.7432 | 4960.1001  | -1.14808  | 0.017100165 |
| BZW1                                | 34320.3242 | 15020.8965 | -1.30556  | 0.006552789 |
| NA                                  | 1264.69067 | 287.731598 | -2.116481 | 0.005370418 |
| UBAC2                               | 1054.98669 | 330.237396 | -1.660165 | 0.040251568 |
| PDXDC1                              | 838.81604  | 256.124725 | -1.704972 | 0.027428897 |
| TMEM242                             | 3950.19531 | 1583.61365 | -1.328084 | 0.013156354 |
| BAG5                                | 3969.59521 | 1099.70142 | -1.859064 | 0.001888141 |
| NA                                  | 3661.96777 | 1757.99646 | -1.068217 | 0.037823007 |

|                                    |            |            |           |             |
|------------------------------------|------------|------------|-----------|-------------|
| RNF183                             | 7142.86963 | 3505.09399 | -1.069029 | 0.027519299 |
| AS3MT C10orf<br>32-ASMT            | 5353.45703 | 1055.01587 | -2.358765 | 0.000288798 |
| PHACTR2                            | 2971.88452 | 5.449462   | NA        | NA          |
| CAPZB                              | 26014.3828 | 6235.27441 | -2.139467 | 0.000217261 |
| CACNA2D4                           | 2331.68677 | 741.126831 | -1.659726 | 0.006863077 |
| C4orf33                            | 3155.72192 | 1347.10693 | -1.233295 | 0.02235215  |
| SBDS SBDSP1                        | 21557.0176 | 7196.55957 | -1.651083 | 0.00151666  |
| SVIL                               | 2440.69604 | 914.419739 | -1.41964  | 0.014435403 |
| NA                                 | 4925.73438 | 1874.61487 | -1.410297 | 0.008121615 |
| ASPH                               | 4085.07104 | 1559.63599 | -1.398771 | 0.009759934 |
| LCOR                               | 3062.41748 | 1247.92676 | -1.299227 | 0.017927753 |
| SMNDC1                             | 5802.42676 | 1874.61487 | -1.651735 | 0.002804545 |
| PMAIP1                             | 9168.77637 | 3580.29639 | -1.403034 | 0.005892107 |
| ALG9                               | 2657.79053 | 871.91394  | -1.614566 | 0.006785282 |
| MAX                                | 2431.45801 | 579.822754 | -2.077167 | 0.001860068 |
| RALB                               | 3225.93115 | 473.013306 | -2.785224 | 0.000209813 |
| ERAL1                              | 1113.1864  | 310.619324 | -1.823144 | 0.013270048 |
| PPIL4                              | 8822.34863 | 2587.40454 | -1.809829 | 0.001151751 |
| PTAFR                              | 3200.0647  | 1067.00464 | -1.589818 | 0.006022556 |
| SMUG1                              | 2214.36353 | 718.239075 | -1.629529 | 0.008069299 |
| LANCL1                             | 1309.95715 | 555.845093 | -1.233803 | 0.049905803 |
| KIF4A KIF4B                        | 1029.12012 | 361.844269 | -1.496481 | 0.033045322 |
| ZCCHC9                             | 13862.6357 | 5599.86719 | -1.358245 | 0.006170649 |
| TOE1                               | 1942.7644  | 859.92511  | -1.173939 | 0.04109272  |
| GJB1                               | 7123.46973 | 2339.99902 | -1.639872 | 0.002542771 |
| NKIRAS1                            | 6898.06104 | 2231.00977 | -1.660425 | 0.002396251 |
| NMNAT3                             | 2107.2019  | 869.734131 | -1.27684  | 0.027117075 |
| ACVR1                              | 868.377808 | 224.517838 | -1.954692 | 0.01528734  |
| CSGALNACT2                         | 1156.60535 | 439.226624 | -1.392191 | 0.037130997 |
| ELF3                               | 379.684357 | 51.224941  | -3.238096 | 0.016618226 |
| NEK2                               | 2224.52539 | 447.94577  | -2.319162 | 0.001148317 |
| BZW1                               | 17848.8594 | 6506.65771 | -1.506072 | 0.00450336  |
| PGM3                               | 15884.8477 | 5544.28271 | -1.564245 | 0.002398425 |
| LARP4                              | 2703.98071 | 1302.42139 | -1.056718 | 0.047664736 |
| FCGR3B FCG<br>R3A                  | 4030.56641 | 1335.11816 | -1.60195  | 0.004595107 |
| LOC391003 PR<br>AMEF19             | 1682.2511  | 526.41803  | -1.675925 | 0.010175272 |
| DEFB131 LOC<br>100129216           | 4130.3374  | 1379.80371 | -1.590338 | 0.004689145 |
| HNRNPCL3 H<br>NRNPCL2 HN<br>RNPCL1 | 26573.2852 | 8264.6543  | -1.772227 | 0.000869695 |

|                                                              |            |            |           |             |
|--------------------------------------------------------------|------------|------------|-----------|-------------|
| SERF1A SERF<br>1B                                            | 4755.75439 | 2101.3125  | -1.197028 | 0.019542908 |
| SRSF10                                                       | 15442.3447 | 7142.06494 | -1.167002 | 0.014258089 |
| ZFAND6 ATP8<br>B5P                                           | 25987.5918 | 5685.96875 | -2.268063 | 0.000140999 |
| ZFAND6 ATP8<br>B5P                                           | 27877.6992 | 14677.5811 | -1.014633 | 0.026297979 |
| PLGLB2 PLGL<br>B1                                            | 12356.832  | 4518.69385 | -1.499223 | 0.003455041 |
| DDX11 LOC64<br>2846 DDX12P                                   | 525.645752 | 158.034393 | -1.783753 | 0.048424512 |
| RDH14 NT5C1<br>B-RDH14                                       | 6228.30127 | 1831.01917 | -1.789421 | 0.00158286  |
| THOC3 LOC72<br>8554                                          | 54116.5664 | 18961.9473 | -1.671926 | 0.001183651 |
| CDK11B CDK1<br>1A                                            | 1687.79395 | 481.732422 | -1.809195 | 0.006947176 |
| TRIM74 TRIM7<br>3 TRIM50                                     | 1896.5741  | 590.72168  | -1.684823 | 0.008365598 |
| TRIM73 TRIM7<br>4 TRIM50                                     | 1518.73743 | 515.519104 | -1.557704 | 0.016484425 |
| CCDC74B CC<br>DC74A                                          | 2250.39185 | 1044.11694 | -1.106283 | 0.045707781 |
| FAM72A FAM7<br>2B FAM72D                                     | 10106.4395 | 5240.20264 | -1.002649 | 0.032980945 |
| GUSBP3 GUS<br>BP4 GUSBP2 <br>GUSBP1 SMA5<br> GUSBP9 GUS<br>B | 5433.82812 | 1743.82788 | -1.658118 | 0.002880272 |
| RSL24D1                                                      | 94852.7266 | 49444.0586 | -1.22844  | 0.008737558 |
| CDKN2AIPNL                                                   | 3615.77734 | 1238.1178  | -1.552093 | 0.00610528  |
| CSNK2A3 CSN<br>K2A1                                          | 3108.60791 | 1105.15088 | -1.49628  | 0.008643473 |
| SETSIP SET                                                   | 2287.34424 | 321.51825  | -2.825821 | 0.000369406 |
| CTAGE9 CTAG<br>E15 CTAGE6 C<br>TAGE8 CTAGE<br>4              | 848.054077 | 223.427933 | -1.928398 | 0.016835116 |
| POTEF POTEJ<br> POTEM ACTB <br>POTEE                         | 87210.0781 | 34752.3086 | -1.572575 | 0.001761446 |
| POTEF POTEJ<br> POTEI POTE                                   | 24656.3867 | 6236.36426 | -2.057633 | 0.000294745 |



|              |            |            |           |             |  |
|--------------|------------|------------|-----------|-------------|--|
| M POTEE      |            |            |           |             |  |
| POTEF POTEJ  | 18183.2773 | 4516.51416 | -2.049888 | 0.000334631 |  |
| POTEI POTE   |            |            |           |             |  |
| M POTEE      |            |            |           |             |  |
| ACTG1        | 119887.875 | 49719.8008 | -1.569963 | 0.001751975 |  |
| SEC13        | 23191.2305 | 9721.83984 | -1.333496 | 0.00611072  |  |
| SEC13        | 27674.4629 | 10283.1348 | -1.522762 | 0.002508835 |  |
| SYNGR2       | 6066.63525 | 1712.22095 | -1.846699 | 0.001312493 |  |
| LOC101929087 | 1382.01404 | 384.732025 | -1.836849 | 0.008915031 |  |
| NA           | 8109.1709  | 1918.21057 | -2.110197 | 0.000419756 |  |
| NA           | 776.921021 | 234.326859 | -1.731258 | 0.029216163 |  |
| NA           | 4889.70605 | 883.90271  | -2.484006 | 0.000229301 |  |
| NA           | 739.044922 | 202.719986 | -1.880634 | 0.023752663 |  |
| NA           | 4593.16455 | 680.092834 | -2.774211 | 0.000124902 |  |
| NA           | 13145.7617 | 827.228333 | -4.019931 | 5.94422E-06 |  |
| NA           | 19961.6035 | 5544.28271 | -1.902225 | 0.000560802 |  |
| NA           | 2089.64966 | 481.732422 | -2.122827 | 0.002100789 |  |
| NA           | 6925.7749  | 2328.01025 | -1.606066 | 0.002959314 |  |
| NA           | 3904.92871 | 1692.60291 | -1.215954 | 0.020507049 |  |
| NA           | 7667.59131 | 3126.90137 | -1.335877 | 0.008517321 |  |
| NA           | 867.454041 | 156.944504 | -2.51149  | 0.00553115  |  |
| NA           | 9863.47852 | 2685.49487 | -1.919979 | 0.000714543 |  |
| NA           | 11816.4053 | 5846.18262 | -1.072391 | 0.023296392 |  |
| NA           | 1934.4502  | 601.620605 | -1.687422 | 0.008075701 |  |
| NA           | 6915.61328 | 1137.84766 | -2.625571 | 0.000109136 |  |
| NA           | 1708.11768 | 297.540619 | -2.505477 | 0.001268705 |  |
| TNFAIP8      | 8786.32031 | 4274.55811 | -1.087211 | 0.023695601 |  |
| SIGMAR1      | 1607.42273 | 643.036499 | -1.319982 | 0.031858437 |  |
| PDIA5        | 7124.39355 | 1182.5332  | -2.613457 | 0.000109243 |  |
| TMEM116      | 1988.03088 | 765.104431 | -1.378672 | 0.020557592 |  |
| ADM          | 25741.8594 | 8976.35352 | -1.606054 | 0.001765306 |  |
| PIGB         | 7413.54492 | 3365.58765 | -1.181433 | 0.016751794 |  |
| MRFAP1L1     | 27704.0234 | 14006.207  | -1.073968 | 0.019946346 |  |
| UBC UBA52    | 149545.75  | 93501.8672 | -1.036252 | 0.021716073 |  |
| CDC25C       | 1824.51721 | 602.71051  | -1.598756 | 0.01142396  |  |

“a” refers to the group treated with siCtr RNA.

“b” refers to the group treated with siPCNAP1.

“Downreg<sup>gene</sup>” refers to the genes downregulated by siPCNAP1.

**Table S6. List of siRNAs used in this paper**

| <b>Gene</b>    |       | <b>Sequence (5'-3')</b> |
|----------------|-------|-------------------------|
| siPCNA-human-1 | Sense | GGAGAAAGUUUCAGACUAU     |
| siPCNA-human-2 | Sense | GAUCGAGGAUGAAGAAGGA     |
| siPCNAP1-1     | Sense | GCACUAAAUCAAGAGAACU     |
| siPCNAP1-2     | Sense | GAGUACAGCUGUGUAAUAA     |
| siPCNAP1-3     | Sense | CCUAGAGAGAUUCUGCUU      |
| siHBc          | Sense | GAUCUCAAUUCUGGGAAUCUCA  |
